# Supplementary material for: A draft genome sequence of the elusive giant squid, Architeuthis dux
Source: Oxford University Press journal article supplement (doi:10.1093/gigascience/giz152), 2020-01-01
Supplement: giz152_giga-d-19-00236_original_submission.pdf [file giz152_giga-d-19-00236_original_submission.pdf]

|                             |                                                                                                                                                                                                                                                                                                                                                                                                                                                                                                                                                                                                                                                                                                                 |                         |
|-----------------------------|-----------------------------------------------------------------------------------------------------------------------------------------------------------------------------------------------------------------------------------------------------------------------------------------------------------------------------------------------------------------------------------------------------------------------------------------------------------------------------------------------------------------------------------------------------------------------------------------------------------------------------------------------------------------------------------------------------------------|-------------------------|
| <b>Manuscript Number:</b>   | GIGA-D-19-00236                                                                                                                                                                                                                                                                                                                                                                                                                                                                                                                                                                                                                                                                                                 |                         |
| <b>Full Title:</b>          | A draft genome sequence of the elusive giant squid, <i>Architeuthis dux</i>                                                                                                                                                                                                                                                                                                                                                                                                                                                                                                                                                                                                                                     |                         |
| <b>Article Type:</b>        | Data Note                                                                                                                                                                                                                                                                                                                                                                                                                                                                                                                                                                                                                                                                                                       |                         |
| <b>Funding Information:</b> | Villum Fonden (VKR023446)                                                                                                                                                                                                                                                                                                                                                                                                                                                                                                                                                                                                                                                                                       | Dr Rute R. da Fonseca   |
|                             | FP7 People: Marie-Curie Actions (272927)                                                                                                                                                                                                                                                                                                                                                                                                                                                                                                                                                                                                                                                                        | Dr Rute R. da Fonseca   |
|                             | Fundação para a Ciência e a Tecnologia (PTDC/MAR/115347/2009)                                                                                                                                                                                                                                                                                                                                                                                                                                                                                                                                                                                                                                                   | Dr Rute R. da Fonseca   |
|                             | Danmarks Grundforskningsfond (DNRF96)                                                                                                                                                                                                                                                                                                                                                                                                                                                                                                                                                                                                                                                                           | Dr Rute R. da Fonseca   |
|                             | Programa Operacional Temático Factores de Competitividade (PT) (COMPETE-FCOMP-01-012)                                                                                                                                                                                                                                                                                                                                                                                                                                                                                                                                                                                                                           | Dr Rute R. da Fonseca   |
|                             | Rede Nacional de Espectrometria de Massa (ROTEIRO/0028/2013)                                                                                                                                                                                                                                                                                                                                                                                                                                                                                                                                                                                                                                                    | Dr Hugo Osorio          |
|                             | Fundação para a Ciência e a Tecnologia (UID/Multi/04423/2019)                                                                                                                                                                                                                                                                                                                                                                                                                                                                                                                                                                                                                                                   | Dr Alexandre Campos     |
|                             | Wellcome Trust (WT108749/Z/15/Z)                                                                                                                                                                                                                                                                                                                                                                                                                                                                                                                                                                                                                                                                                | Dr Mateus Patricio      |
|                             | Danmarks Grundforskningsfond (DNRF94)                                                                                                                                                                                                                                                                                                                                                                                                                                                                                                                                                                                                                                                                           | Dr M. Thomas P. Gilbert |
|                             | Lundbeckfonden (R52-5062)                                                                                                                                                                                                                                                                                                                                                                                                                                                                                                                                                                                                                                                                                       | Dr M. Thomas P. Gilbert |
|                             | Novo Nordisk Fonden (NNF14CC0001)                                                                                                                                                                                                                                                                                                                                                                                                                                                                                                                                                                                                                                                                               | Dr Simon Rasmussen      |
|                             | Biotechnology and Biological Sciences Research Council (BB/N020146/1)                                                                                                                                                                                                                                                                                                                                                                                                                                                                                                                                                                                                                                           | Dr Alex Hayward         |
|                             | Biotechnology and Biological Sciences Research Council (BB/M009122/1)                                                                                                                                                                                                                                                                                                                                                                                                                                                                                                                                                                                                                                           | Dr Tobias Baril         |
|                             | Lundbeckfonden (R52-A4895)                                                                                                                                                                                                                                                                                                                                                                                                                                                                                                                                                                                                                                                                                      | Dr Blagoy Blagoev       |
|                             | Nederlandse Organisatie voor Wetenschappelijk Onderzoek (NL) (#825.09.016)                                                                                                                                                                                                                                                                                                                                                                                                                                                                                                                                                                                                                                      | Dr Henk-Jan Hoving      |
|                             | Deutsche Forschungsgemeinschaft (DE) (HO 5569/1-2)                                                                                                                                                                                                                                                                                                                                                                                                                                                                                                                                                                                                                                                              | Dr Henk-Jan Hoving      |
|                             | Slovak grant agency VEGA (VEGA 1/0684/16)                                                                                                                                                                                                                                                                                                                                                                                                                                                                                                                                                                                                                                                                       | Dr Brona Brejova        |
|                             | Slovak grant agency VEGA (VEGA 1/0458/18)                                                                                                                                                                                                                                                                                                                                                                                                                                                                                                                                                                                                                                                                       | Dr Tomas Vinar          |
| <b>Abstract:</b>            | <p><b>Background</b></p> <p>The giant squid (<i>Architeuthis dux</i>; Steenstrup, 1857) is an enigmatic giant mollusk with a circumglobal distribution in the deep ocean, except in the high Arctic and Antarctic waters. The elusiveness of the species makes it difficult to study. Thus, having a genome assembled for this deep-sea dwelling species will allow unlocking several pending evolutionary questions.</p> <p><b>Findings</b></p> <p>We present a draft genome assembly that includes 200 Gb of Illumina reads, 4 Gb of Moleculo synthetic long-reads and 108 Gb of Chicago libraries, with a final size matching the estimated genome size of 2.7 Gb, and a scaffold N50 of 4.8 Mb. We also</p> |                         |

|                                                      |                                                                                                                                                                                                                                                                                                                                                                                                                                                                                                                                                                                                                                                                                                                       |
|------------------------------------------------------|-----------------------------------------------------------------------------------------------------------------------------------------------------------------------------------------------------------------------------------------------------------------------------------------------------------------------------------------------------------------------------------------------------------------------------------------------------------------------------------------------------------------------------------------------------------------------------------------------------------------------------------------------------------------------------------------------------------------------|
|                                                      | <p>present an alternative assembly including 27 Gb raw reads generated using the Pacific Biosciences platform. In addition, we sequenced the proteome of the same individual and RNA from three different tissue types from three other species of squid to assist genome annotation. We annotated 51,225 unique protein coding genes, from which 30,472 have transcript evidence. Genome completeness estimated by BUSCO reached 92%. Repetitive regions cover 49.17% of the genome.</p> <p>Conclusions</p> <p>This annotated draft genome of <i>A. dux</i> provides a critical resource to investigate the unique traits of this species, including its gigantism and key adaptations to deep-sea environments.</p> |
| <b>Corresponding Author:</b>                         | Rute R. da Fonseca<br>University of Copenhagen<br>Copenhagen, DENMARK                                                                                                                                                                                                                                                                                                                                                                                                                                                                                                                                                                                                                                                 |
| <b>Corresponding Author Secondary Information:</b>   |                                                                                                                                                                                                                                                                                                                                                                                                                                                                                                                                                                                                                                                                                                                       |
| <b>Corresponding Author's Institution:</b>           | University of Copenhagen                                                                                                                                                                                                                                                                                                                                                                                                                                                                                                                                                                                                                                                                                              |
| <b>Corresponding Author's Secondary Institution:</b> |                                                                                                                                                                                                                                                                                                                                                                                                                                                                                                                                                                                                                                                                                                                       |
| <b>First Author:</b>                                 | Rute R. da Fonseca                                                                                                                                                                                                                                                                                                                                                                                                                                                                                                                                                                                                                                                                                                    |
| <b>First Author Secondary Information:</b>           |                                                                                                                                                                                                                                                                                                                                                                                                                                                                                                                                                                                                                                                                                                                       |
| <b>Order of Authors:</b>                             | Rute R. da Fonseca                                                                                                                                                                                                                                                                                                                                                                                                                                                                                                                                                                                                                                                                                                    |
|                                                      | Alvarina Couto                                                                                                                                                                                                                                                                                                                                                                                                                                                                                                                                                                                                                                                                                                        |
|                                                      | Andre Machado                                                                                                                                                                                                                                                                                                                                                                                                                                                                                                                                                                                                                                                                                                         |
|                                                      | Brona Brejova                                                                                                                                                                                                                                                                                                                                                                                                                                                                                                                                                                                                                                                                                                         |
|                                                      | Caroline B. Albertin                                                                                                                                                                                                                                                                                                                                                                                                                                                                                                                                                                                                                                                                                                  |
|                                                      | Filipe Silva                                                                                                                                                                                                                                                                                                                                                                                                                                                                                                                                                                                                                                                                                                          |
|                                                      | Paul Gardner                                                                                                                                                                                                                                                                                                                                                                                                                                                                                                                                                                                                                                                                                                          |
|                                                      | Tobias Baril                                                                                                                                                                                                                                                                                                                                                                                                                                                                                                                                                                                                                                                                                                          |
|                                                      | Alex Hayward                                                                                                                                                                                                                                                                                                                                                                                                                                                                                                                                                                                                                                                                                                          |
|                                                      | Alexandre Campos                                                                                                                                                                                                                                                                                                                                                                                                                                                                                                                                                                                                                                                                                                      |
|                                                      | Angela Ribeiro                                                                                                                                                                                                                                                                                                                                                                                                                                                                                                                                                                                                                                                                                                        |
|                                                      | Inigo Barrio Hernandez                                                                                                                                                                                                                                                                                                                                                                                                                                                                                                                                                                                                                                                                                                |
|                                                      | Henk-Jan Hoving                                                                                                                                                                                                                                                                                                                                                                                                                                                                                                                                                                                                                                                                                                       |
|                                                      | Ricardo Tafur-Jimenez                                                                                                                                                                                                                                                                                                                                                                                                                                                                                                                                                                                                                                                                                                 |
|                                                      | Chong Chu                                                                                                                                                                                                                                                                                                                                                                                                                                                                                                                                                                                                                                                                                                             |
|                                                      | Barbara Frazao                                                                                                                                                                                                                                                                                                                                                                                                                                                                                                                                                                                                                                                                                                        |
|                                                      | Bent Petersen                                                                                                                                                                                                                                                                                                                                                                                                                                                                                                                                                                                                                                                                                                         |
|                                                      | Fernando Penalosa                                                                                                                                                                                                                                                                                                                                                                                                                                                                                                                                                                                                                                                                                                     |
|                                                      | Francesco Musacchia                                                                                                                                                                                                                                                                                                                                                                                                                                                                                                                                                                                                                                                                                                   |
|                                                      | Graham C. Alexander Jr.                                                                                                                                                                                                                                                                                                                                                                                                                                                                                                                                                                                                                                                                                               |
|                                                      | Hugo Osorio                                                                                                                                                                                                                                                                                                                                                                                                                                                                                                                                                                                                                                                                                                           |
|                                                      | Inger Winkelmann                                                                                                                                                                                                                                                                                                                                                                                                                                                                                                                                                                                                                                                                                                      |
|                                                      | Oleg Simakov                                                                                                                                                                                                                                                                                                                                                                                                                                                                                                                                                                                                                                                                                                          |
|                                                      |                                                                                                                                                                                                                                                                                                                                                                                                                                                                                                                                                                                                                                                                                                                       |

|                                                                                                                                                                                                                                                                                                                                                                                                                              |                         |
|------------------------------------------------------------------------------------------------------------------------------------------------------------------------------------------------------------------------------------------------------------------------------------------------------------------------------------------------------------------------------------------------------------------------------|-------------------------|
|                                                                                                                                                                                                                                                                                                                                                                                                                              | Simon Rasmussen         |
|                                                                                                                                                                                                                                                                                                                                                                                                                              | M. Ziaur Rahman         |
|                                                                                                                                                                                                                                                                                                                                                                                                                              | Davide Pisani           |
|                                                                                                                                                                                                                                                                                                                                                                                                                              | Erich Jarvis            |
|                                                                                                                                                                                                                                                                                                                                                                                                                              | Guojie Zhang            |
|                                                                                                                                                                                                                                                                                                                                                                                                                              | Jakob Vinther           |
|                                                                                                                                                                                                                                                                                                                                                                                                                              | Jan Strugnell           |
|                                                                                                                                                                                                                                                                                                                                                                                                                              | L. Filipe C. Castro     |
|                                                                                                                                                                                                                                                                                                                                                                                                                              | Olivier Fedrigo         |
|                                                                                                                                                                                                                                                                                                                                                                                                                              | Mateus Patricio         |
|                                                                                                                                                                                                                                                                                                                                                                                                                              | Qiye Li                 |
|                                                                                                                                                                                                                                                                                                                                                                                                                              | Sara Rocha              |
|                                                                                                                                                                                                                                                                                                                                                                                                                              | Agostinho Antunes       |
|                                                                                                                                                                                                                                                                                                                                                                                                                              | Yufeng Wu               |
|                                                                                                                                                                                                                                                                                                                                                                                                                              | Bin Ma                  |
|                                                                                                                                                                                                                                                                                                                                                                                                                              | Remo Sanges             |
|                                                                                                                                                                                                                                                                                                                                                                                                                              | Tomas Vinar             |
|                                                                                                                                                                                                                                                                                                                                                                                                                              | Blagoy Blagoev          |
|                                                                                                                                                                                                                                                                                                                                                                                                                              | Thomas Sicheritz-Ponten |
|                                                                                                                                                                                                                                                                                                                                                                                                                              | Rasmus Nielsen          |
|                                                                                                                                                                                                                                                                                                                                                                                                                              | M. Thomas P. Gilbert    |
| <b>Order of Authors Secondary Information:</b>                                                                                                                                                                                                                                                                                                                                                                               |                         |
| <b>Additional Information:</b>                                                                                                                                                                                                                                                                                                                                                                                               |                         |
| <b>Question</b>                                                                                                                                                                                                                                                                                                                                                                                                              | <b>Response</b>         |
| Are you submitting this manuscript to a special series or article collection?                                                                                                                                                                                                                                                                                                                                                | No                      |
| <b>Experimental design and statistics</b><br><br>Full details of the experimental design and statistical methods used should be given in the Methods section, as detailed in our <a href="#">Minimum Standards Reporting Checklist</a> . Information essential to interpreting the data presented should be made available in the figure legends.<br><br>Have you included all the information requested in your manuscript? | Yes                     |
| <b>Resources</b>                                                                                                                                                                                                                                                                                                                                                                                                             | Yes                     |

|                                                                                                                                                                                                                                                                                                                                                                                                                                                                                                                                                         |            |
|---------------------------------------------------------------------------------------------------------------------------------------------------------------------------------------------------------------------------------------------------------------------------------------------------------------------------------------------------------------------------------------------------------------------------------------------------------------------------------------------------------------------------------------------------------|------------|
| <p>A description of all resources used, including antibodies, cell lines, animals and software tools, with enough information to allow them to be uniquely identified, should be included in the Methods section. Authors are strongly encouraged to cite <a href="#">Research Resource Identifiers</a> (RRIDs) for antibodies, model organisms and tools, where possible.</p> <p>Have you included the information requested as detailed in our <a href="#">Minimum Standards Reporting Checklist</a>?</p>                                             |            |
| <p><b>Availability of data and materials</b></p> <p>All datasets and code on which the conclusions of the paper rely must be either included in your submission or deposited in <a href="#">publicly available repositories</a> (where available and ethically appropriate), referencing such data using a unique identifier in the references and in the “Availability of Data and Materials” section of your manuscript.</p> <p>Have you have met the above requirement as detailed in our <a href="#">Minimum Standards Reporting Checklist</a>?</p> | <p>Yes</p> |

# 1 A draft genome sequence of the elusive giant squid, *Architeuthis dux*

2

3 Rute R. da Fonseca<sup>\*1,2</sup>, Alvarina Couto<sup>3</sup>, Andre Machado<sup>4</sup>, Brona Brejova<sup>5</sup>, Carolin B. Albertin<sup>6</sup>, Filipe  
4 Silva<sup>4</sup>, Paul Gardner<sup>7</sup>, Toby Baril<sup>8</sup>, Alex Hayward<sup>8</sup>, Alexandre Campos<sup>4</sup>, Ângela Ribeiro<sup>4</sup>, Inigo Barrio  
5 Hernandez<sup>9</sup>, Henk-Jan Hoving<sup>10</sup>, Ricardo Tafur-Jimenez<sup>11</sup>, Chong Chu<sup>12</sup>, Barbara Frazão<sup>4,13</sup>, Bent  
6 Petersen<sup>14,15</sup>, Fernando Peñaloza<sup>16</sup>, Francesco Musacchia<sup>17</sup>, Graham C. Alexander Jr.<sup>18</sup>, Hugo  
7 Osório<sup>19,20,21</sup>, Inger Winkelmann<sup>22</sup>, Oleg Simakov<sup>23</sup>, Simon Rasmussen<sup>24</sup>, M. Ziaur Rahman<sup>25</sup>, Davide  
8 Pisani<sup>26</sup>, Jakob Vinther<sup>27</sup>, Erich Jarvis<sup>28</sup>, Guojie Zhang<sup>30,31,32,33</sup>, Jan Strugnell<sup>34</sup>, L. Filipe C. Castro<sup>4,36</sup>, Olivier  
9 Fedrigo<sup>28</sup>, Mateus Patricio<sup>29</sup>, Qiye Li<sup>37</sup>, Sara Rocha<sup>3</sup>, Agostinho Antunes<sup>4,36</sup>, Yufeng Wu<sup>38</sup>, Bin Ma<sup>39</sup>, Remo  
10 Sanges<sup>40,41</sup>, Tomas Vinar<sup>5</sup>, Blagoy Blagoev<sup>9</sup>, Thomas Sicheritz-Ponten<sup>14,15</sup>, Rasmus Nielsen<sup>22,42</sup>, M. Thomas  
11 P. Gilbert<sup>22,43</sup>

12

13 <sup>1</sup>Center for Macroecology, Evolution and Climate, Natural History Museum of Denmark, University of  
14 Copenhagen, Copenhagen, Denmark.

15 <sup>2</sup>The Bioinformatics Centre, Department of Biology, University of Copenhagen, Copenhagen, Denmark.

16 <sup>3</sup>Department of Biochemistry, Genetics and Immunology, University of Vigo, Vigo, Spain.

17 <sup>4</sup>CIIMAR, Interdisciplinary Centre of Marine and Environmental Research, University of Porto, Porto,  
18 Portugal.

19 <sup>5</sup>Faculty of Mathematics, Physics and Informatics, Comenius University in Bratislava, Bratislava, Slovak  
20 Republic.

21 <sup>6</sup>Department of Organismal Biology and Anatomy, University of Chicago, Chicago, USA.

22 <sup>7</sup>Department of Biochemistry, University of Otago, New Zealand.

23 <sup>8</sup>Centre for Ecology and Conservation, University of Exeter, Penryn Campus, Cornwall, UK.

24 <sup>9</sup>Department of Biochemistry and Molecular Biology, University of Southern Denmark, Odense,  
25 Denmark.

26 <sup>10</sup>GEOMAR Helmholtz Centre for Ocean Research Kiel, Kiel, Germany.

27 <sup>11</sup>Instituto del Mar del Perú.

28 <sup>12</sup>Department of Biomedical Informatics, Harvard Medical School, Boston, USA.

29 <sup>13</sup>IPMA, Fitoplâncton Lab, Lisboa, Portugal.

30 <sup>14</sup>Centre of Excellence for Omics-Driven Computational Biodiscovery (COMBio), Faculty of Applied  
31 Sciences, AIMST University, Kedah, Malaysia.

32 <sup>17</sup>Genomic Medicine, Telethon Institute of Genetics and Medicine, Pozzuoli, Naples, Italy

33 <sup>18</sup>GCB Sequencing and Genomic Technologies Shared Resource, Duke University, Durham, NC, USA.

34 <sup>19</sup>i3S-Instituto de Investigação e Inovação em Saúde, Universidade do Porto, Porto, Portugal.

35 <sup>20</sup>IPATIMUP -Institute of Molecular Pathology and Immunology, University of Porto, Porto, Portugal.

36 <sup>21</sup>Faculty of Medicine of the University of Porto, Porto, Portugal.

37 <sup>22</sup>Centre for GeoGenetics, Natural History Museum of Denmark, University of Copenhagen, Copenhagen,  
38 Denmark.

39 <sup>23</sup>Department of Molecular Evolution and Development, University of Vienna, Vienna, Austria.

40 <sup>24</sup>Novo Nordisk Foundation Center for Protein Research, Faculty of Health and Medical Sciences,  
41 University of Copenhagen, Copenhagen, Denmark

42 <sup>25</sup>Bioinformatics Solutions Inc, Waterloo, Ontario, Canada.

43 <sup>26</sup>Departments of Biological sciences and Earth Sciences, University of Bristol, Bristol, UK.

44 <sup>27</sup>Departments of Biological sciences and Earth Sciences, University of Bristol, Bristol, UK.

45 <sup>28</sup>The Rockefeller University, New York, USA.

46 <sup>29</sup>European Molecular Biology Laboratory, European Bioinformatics Institute (EMBL-EBI), Wellcome  
47 Genome Campus, Hinxton, UK.

48 <sup>30</sup>Section for Ecology and Evolution, Department of Biology, University of Copenhagen, Copenhagen,  
49 Denmark.

50 <sup>31</sup>China National Genebank, BGI-Shenzhen, Shenzhen, China.

51 <sup>32</sup>State Key Laboratory of Genetic Resources and Evolution, Kunming Institute of Zoology, Chinese  
52 Academy of Sciences, Kunming, China.

53 <sup>33</sup>CAS Center for Excellence in Animal Evolution and Genetics, Chinese Academy of Sciences, Kunming,  
54 China.

55 <sup>34</sup>Centre for Sustainable Tropical Fisheries & Aquaculture, James Cook University, Townsville,  
56 Queensland, Australia

57 <sup>35</sup>Department of Ecology, Environment and Evolution, School of Life Sciences, La Trobe University,  
58 Melbourne, Victoria, Australia

59 <sup>36</sup>Department of Biology, Faculty of Sciences, University of Porto, Portugal.

60 <sup>37</sup>BGI-Shenzhen, Shenzhen, China

61 <sup>38</sup>Department of Computer Science and Engineering, University of Connecticut, Storrs, USA.

62 <sup>39</sup>School of Computer Science, University of Waterloo, Canada.

63 <sup>40</sup>Area of Neuroscience, Scuola Internazionale Superiore di Studi Avanzati (SISSA), Trieste, Italy.

64 <sup>41</sup>Biology and Evolution of Marine Organisms, Stazione Zoologica Anton Dohrn, Napoli, Italy.

65 <sup>42</sup>Departments of Integrative Biology and Statistics, University of California, Berkeley, U.S.A.

66 <sup>43</sup>Norwegian University of Science and Technology, University Museum, Trondheim, Norway

67

68 Email addresses:

69 Rute R da Fonseca: rfonseca@bio.ku.dk (corresponding author)  
70 Alvarina Couto: alvarinacouto@gmail.com  
71 Andre M.Machado: andre.machado@ciimar.up.pt  
72 Brona Brejova: brejova@fmph.uniba.sk  
73 Caroline B.Albertin: calbertin@mbl.edu

74 Filipe Silva: [filipecgilva@gmail.com](mailto:filipecgilva@gmail.com)  
75 Paul Gardner: [paul.gardner@otago.ac.nz](mailto:paul.gardner@otago.ac.nz)  
76 Tobias Baril: [tb529@exeter.ac.uk](mailto:tb529@exeter.ac.uk)  
77 Alex Hayward Hayward: [Alex.Hayward@exeter.ac.uk](mailto:Alex.Hayward@exeter.ac.uk)  
78 Alexandre Campos: [acampos@ciimar.up.pt](mailto:acampos@ciimar.up.pt)  
79 Ângela Ribeiro [ribeiro.angela@gmail.com](mailto:ribeiro.angela@gmail.com)  
80 Inigo Barrio Hernandez: [ibarrioh@ebi.ac.uk](mailto:ibarrioh@ebi.ac.uk)  
81 Henk-Jan Hoving: [hoving@geomar.de](mailto:hoving@geomar.de)  
82 Ricardo Tafur-Jiménez: [rtafur@imarpe.gob.pe](mailto:rtafur@imarpe.gob.pe)  
83 Chong Chu: [Chong\\_Chu@hms.harvard.edu](mailto:Chong_Chu@hms.harvard.edu)  
84 Barbara Frazão: [bmfrazao@gmail.com](mailto:bmfrazao@gmail.com)  
85 Bent Petersen: [bent.petersen@bio.ku.dk](mailto:bent.petersen@bio.ku.dk)  
86 Fernando Peñaloza: [fpenaloz@lcg.unam.mx](mailto:fpenaloz@lcg.unam.mx)  
87 Francesco Musacchia: [f.musacchia@tigem.it](mailto:f.musacchia@tigem.it)  
88 Graham C. Alexander Jr.: [gca2@duke.edu](mailto:gca2@duke.edu)  
89 Hugo Osório: [hosorio@ipatimup.pt](mailto:hosorio@ipatimup.pt)  
90 Inger E. Winkelmann: [inger.winkelmann@gmail.com](mailto:inger.winkelmann@gmail.com)  
91 Oleg Simakov: [oleg.simakov@univie.ac.at](mailto:oleg.simakov@univie.ac.at)  
92 Simon Rasmussen: [simon.rasmussen@cpr.ku.dk](mailto:simon.rasmussen@cpr.ku.dk)  
93 M. Ziaur Rahman: [zrahman@bioinfor.com](mailto:zrahman@bioinfor.com)  
94 Davide Pisani: [Davide.Pisani@bristol.ac.uk](mailto:Davide.Pisani@bristol.ac.uk)  
95 Erich D. Jarvis: [ejarvis@rockefeller.edu](mailto:ejarvis@rockefeller.edu)  
96 Guojie Zhang: [zhanggjconi@gmail.com](mailto:zhanggjconi@gmail.com)  
97 Jakob Vinther: [vinther.jakob@gmail.com](mailto:vinther.jakob@gmail.com)  
98 Jan M. Strugnell: [jan.strugnell@jcu.edu.au](mailto:jan.strugnell@jcu.edu.au)  
99 L. Filipe C. Castro: [filipe.castro@ciimar.up.pt](mailto:filipe.castro@ciimar.up.pt)  
100 Olivier Fedrigo: [ofedrigo@rockefeller.edu](mailto:ofedrigo@rockefeller.edu)  
101 Mateus Patricio: [mateus@ebi.ac.uk](mailto:mateus@ebi.ac.uk)  
102 Qiye Li: [liqiye@genomics.cn](mailto:liqiye@genomics.cn)  
103 Sara Rocha: [sprocha@gmail.com](mailto:sprocha@gmail.com)  
104 Agostinho Antunes: [aantunes@ciimar.up.pt](mailto:aantunes@ciimar.up.pt)  
105 Yufeng Wu: [ywu@engr.uconn.edu](mailto:ywu@engr.uconn.edu)  
106 Bin Ma: [binma@uwaterloo.ca](mailto:binma@uwaterloo.ca)  
107 Remo Sanges: [remo.sanges@gmail.com](mailto:remo.sanges@gmail.com)  
108 Tomas Vinar: [tomas.vinar@fmph.uniba.sk](mailto:tomas.vinar@fmph.uniba.sk)  
109 Blagoy Blagoev: [bab@bmb.sdu.dk](mailto:bab@bmb.sdu.dk)  
110 Thomas Sicheritz-Ponten: [thomassp@bio.ku.dk](mailto:thomassp@bio.ku.dk)  
111 Rasmus Nielsen: [rasmus\\_nielsen@berkeley.edu](mailto:rasmus_nielsen@berkeley.edu)  
112 M. Thomas P. Gilbert: [tgilbert@snm.ku.dk](mailto:tgilbert@snm.ku.dk)



## 113 Abstract

### 114 Background

115 The giant squid (*Architeuthis dux*; Steenstrup, 1857) is an enigmatic giant mollusk with a circumglobal  
116 distribution in the deep ocean, except in the high Arctic and Antarctic waters. The elusiveness of the  
117 species makes it difficult to study. Thus, having a genome assembled for this deep-sea dwelling species  
118 will allow unlocking several pending evolutionary questions.

### 119 Findings

120 We present a draft genome assembly that includes 200 Gb of Illumina reads, 4 Gb of Moleculo synthetic  
121 long-reads and 108 Gb of Chicago libraries, with a final size matching the estimated genome size of 2.7  
122 Gb, and a scaffold N50 of 4.8 Mb. We also present an alternative assembly including 27 Gb raw reads  
123 generated using the Pacific Biosciences platform. In addition, we sequenced the proteome of the same  
124 individual and RNA from three different tissue types from three other species of squid to assist genome  
125 annotation. We annotated 51,225 unique protein coding genes, from which 30,472 have transcript  
126 evidence. Genome completeness estimated by BUSCO reached 92%. Repetitive regions cover 49.17% of  
127 the genome.

### 128 Conclusions

129 This annotated draft genome of *A. dux* provides a critical resource to investigate the unique traits of this  
130 species, including its gigantism and key adaptations to deep-sea environments.

### 131 Keywords

132 Cephalopod, invertebrate, genome assembly.

133

## 134 Data description

### 135 Context

136 Cephalopods are the most behaviourally complex of the invertebrate protostomes [1]. Their large, highly  
137 differentiated brains are comparable in relative size and complexity to those of vertebrates [2], as are  
138 their cognitive capabilities [1]. Cephalopods are distributed worldwide from tropical to polar marine  
139 habitats, from benthic to pelagic zones and from intertidal areas down to the abyssal parts of the deep  
140 sea, with the only exception being the Black Sea. Cephalopod populations are thought to be currently  
141 increasing locally for a variety of reasons [3], including potential predator release as a consequence of the  
142 depletion of fish stocks [4]. The class Cephalopoda contains approximately 800 species, with the vast  
143 majority belonging to the soft-bodied subclass Coleoidea (cuttlefishes, octopuses and squids), and a small  
144 handful belonging to the Nautiloidea (nautiluses) [5]. Cephalopods are ecologically important as a primary  
145 food source for marine mammals, birds and for many fish species. They are also increasingly important as  
146 a high-protein food source for humans and are a growing target for commercial fisheries and farming [6].  
147 Cephalopods show a wide variety of morphologies, lifestyles and behaviours [7], but with the exception  
148 of the nautiluses they are characterised by having rapid growth and short lifespans, despite a considerable  
149 investment in costly sensory adaptations [2]. They range in size from the tiny pygmy squids (~2cm) to  
150 animals that are nearly 3 orders of magnitude larger, such as the giant squid, *Architeuthis dux* (at least 10-  
151 12m and reported up to 20m total length) [6,8,9], to the colossal squid, *Mesonychoteuthis hamiltoni*  
152 (maximum length remains unclear, but a recorded weight of 500kg makes it the largest known  
153 invertebrate [10]). A sophisticated adaptive body patterning system that can rapidly alter the texture,  
154 pattern, colour and brightness of its skin, facilitates a complex communication system, while also  
155 providing exceptional camouflage and mimicry [11]. Together these allow cephalopods to both avoid  
156 predators, and hunt prey highly efficiently, making them some of the top predators in the ocean. The  
157 remarkable adaptations of cephalopods also extend to their genome, with recent work demonstrating

158 increased levels of RNA editing to diversify proteins involved in neural functions [12].  
159 Over recent years, oceanic warming and acidification, pollution, expanding hypoxia and fishing [13–15]  
160 have been shown to affect cephalopod populations. Depletion due to high rates of cephalopod by-catch  
161 in commercial fisheries can also result in regional extinction [16]. Mercury has been found in high  
162 concentrations in the tissue of giant squid specimens [17], and accumulation of flame retardant chemicals  
163 has also been detected in the tissue of deep-sea cephalopods [18]. Consequently, there is an urgent need  
164 for greater biological understanding of these important, but rarely encountered animals, in order to aid  
165 conservation efforts and ensure their continued existence. A genome is an important resource for future  
166 population genomics studies aiming at characterizing the diversity of the legendary giant squid, the  
167 species which has inspired generations to tell tales of the fabled Kraken.

168

## 169 Methods

### 170 *DNA extraction, library building, and de novo genome assembly*

171 High-molecular-weight genomic DNA was extracted from a *Architeuthis dux* (NCBI taxon id: 256136)  
172 sample using a CTAB based buffer followed by organic solvent purification, following Winkelmann et al  
173 [19] (details in the Supplementary Information). We generated 116 Gb of raw reads from Illumina short-  
174 insert libraries, 76 Gb of paired-end reads from libraries ranging from 500 bp to 800 bp in insert size, and  
175 5.4 Gb of mate-pair with a 5 kb insert (Table S1). Furthermore, we generated 3.7 Gb of Moleculo  
176 libraries (3 High-Throughput libraries and 4 High-Fidelity libraries). The kmer distribution of the reads  
177 under a diploid model in kmergenie [20] predicted the genome size to be 2.7 Gb.

178 An initial assembly generated with Meraculous [21] using Illumina and Moleculo data (N50 of 32 Kb,  
179 assembly statistics in Table S2) was used as input for Dovetail Genomic's HiRise scaffolding software  
180 together with the Hi-C data generated from two Chicago libraries corresponding to a physical coverage  
181 of the genome of 52.1X. The final assembly with an N50 of 4.8 Mb (other statistics in Table 1) was used

182 for the genome annotation presented in this paper. The genome gene content completeness was  
183 evaluated through the Benchmarking Universal Single-Copy Orthologs (BUSCO v.3.0.2, datasets:  
184 Eukaryota, Metazoan) [22]. For Eukaryota and Metazoa we identified a total of 90.4 % and 92.1 % of  
185 BUSCO ortholog genes, respectively. Further scaffolding was done using 23.38Gb of PacBio reads (19  
186 SMRT cells, average read length is 14.79kb) using the default parameters in PBJelly [23] (see assembly  
187 statistics in Table S2).

#### 188 *Transcriptome sequencing and de novo assembly*

189 Given the extreme rarity of live giant squid sightings, we were unable to collect fresh organ samples  
190 (following the recommendations in [24]) containing intact RNA from the species to assist with the  
191 genome annotation. As an alternative, we extracted total RNA from gonad, liver and brain tissue from  
192 live caught specimens of three other oegopsid squid species (*Onychoteuthis banksii*, *Dosidicus gigas*, and  
193 *Sthenoteuthis oualaniensis*; NCBI taxon ids 392296, 346249 and 34553, respectively; Supplementary  
194 Figure S1), using the Qiagen RNeasy extraction kit (Qiagen, CA, USA). The RNA integrity and quantity was  
195 measured on a Qubit fluorometer (Invitrogen, OR, USA) and on the Agilent Bioanalyzer 2100 (Agilent,  
196 CA, USA). The Illumina TruSeq Kit v.2.0 was used to isolate the mRNA and prepare cDNA libraries for  
197 sequencing, following the recommended protocol. Compatible index sequences were assigned to  
198 individual libraries to allow for multiplexing on four lanes of 100bp paired-end technology on an Illumina  
199 HiSeq 2000 flow cell. Sequencing of the cDNA libraries was done at the National High-throughput  
200 Sequencing Center at the University of Copenhagen in Denmark. We assessed the quality of the raw  
201 reads using FastQC v0.10.0 [25]. After removing indexes and adaptors with CutAdapt [26], we trimmed  
202 the reads with the FASTX-toolkit ([http://hannonlab.cshl.edu/fastx\\_toolkit](http://hannonlab.cshl.edu/fastx_toolkit)) removing bases with a Phred-  
203 scale quality score lower than 25. Reference transcriptomes were built with Trinity [27]. This software  
204 was used with the default settings including a fixed k-mer size of 25 as suggested by the authors.  
205 Annotation of coding regions was done with the EvidentialGene pipeline [28].

206 *Protein extraction, separation by 1D SDS–PAGE, MALDI-TOF/TOF and Protein Identification*

207 Given the practical impossibility of obtaining RNA from a giant squid specimen, we produced a library of  
208 giant squid peptide sequences to guide the gene annotation process.

209 Proteins were solubilised from a giant squid mantle tissue sample according to the procedure described  
210 by Kleffmann et al. [29] and employing the following buffers: (1) 40 mM Tris–HCl, 5 mM MgCl<sub>2</sub> and 1  
211 mM DTT, pH 8.5; (2) 8 M urea, 20 mM Tris, 5 mM MgCl<sub>2</sub> and 20 mM DTT; (3) 7 M urea, 2 M thiourea, 20  
212 mM Tris, 40 mM DTT, 2% CHAPS (w/v) and 1% Triton X-100 (v/v) and (4) 40 mM Tris, 4% SDS (w/v)  
213 and 40 mM DTT. All buffers were augmented with protease inhibitors (Halt™ Protease Inhibitor Cocktail,  
214 EDTA-Free, Thermo Scientific). Tissue samples were ground in liquid nitrogen before homogenization, or  
215 homogenized directly with ultrasound (probe sonication at 60 Hz, for 3 min) in buffer 1. Solubilised  
216 proteins were collected by ultracentrifugation at 100,000 g and 4 °C. Each extraction was performed in  
217 duplicate for each specific buffer and extracts were pooled. Protein extracts were subsequently stored  
218 at -20 °C. Total protein content was estimated according to the Bradford (1976) method [30].

219 Protein separation by 1D SDS–PAGE electrophoresis was carried out as described in Santos et al. [31]. 53  
220 µL of sample (39 µg protein) was diluted in 72 µL of Loading Buffer (0.01% bromophenol blue, 2% SDS  
221 (Sodium-DodecylSulfate), 20% glycerol, 5% β-mercaptoethanol (w/v/v) in 62.5 mM Tris – HCl, pH 6.8).  
222 The resulting solution was heated for 3 min at 99°C. Proteins were separated by SDS–PAGE with 12%  
223 (w/v) polyacrylamide gels. Electrophoresis was carried out using the mini Protean Cell (BioRad) at a  
224 constant voltage of 150 V. The separated proteins were visualized by staining with Colloidal Coomassie  
225 Brilliant Blue (CCB) [32], and lanes were cut into 15 gel sections for subsequent LC-MS/MS analysis.

226 *LC–MS/MS analyses*

227 All samples were analysed with the Easy-nLC system (Thermo Fisher Scientific), connected online to a Q  
228 Exactive mass spectrometer (Thermo Fisher Scientific) equipped with a nanoelectrospray ion source  
229 (Thermo Fisher Scientific). Tryptic peptides were loaded in a fused silica column (75 µm inner diameter)

230 packed with C18 resin (3- $\mu$ m beads, Reprosil, Dr. Maisch), with solvent A (0.5% acetic acid). They were  
231 then eluted with a 120 minute gradient of solvent B (80% ACN, 0.5% acetic acid) with a constant flow of  
232 250 nL/min. The Q exactive was operated in positive mode with a capillary temperature of 250 °C, using  
233 the data dependent acquisition method, which switches from full MS scans to MS/MS scans for the 12  
234 most intense ions. Fragmentation was achieved by higher-energy collisional dissociation (HCD) with a  
235 normalized collisional energy (NCE) of 25. Full MS ranged from 300 to 1750 m/z at a resolution of  
236 70,000, an Automatic Gain Control (AGC) of 1e6 and a maximum injection time of 120 ms, whereas  
237 MS/MS events were scanned at a resolution of 35,000, an AGC of 1e5, maximum injection time of 124  
238 ms, isolation windows of 2 m/z and an exclusion window of 45 seconds.

#### 239 *de novo peptide prediction*

240 Raw LC-MS/MS data were read using Thermo Fisher MSRawFileReader 2.2 library and imported into  
241 PEAKS Studio 7.0 and subsequently preprocessed for precursor mass and charge correction, MS/MS de-  
242 isotoping, and deconvolution. PEAKS de novo sequencing [31] was performed on each refined MS/MS  
243 spectrum with a precursor and fragment ion error tolerance of 7 ppm and 0.02 da respectively.  
244 Carbamidomethylation (Cys) was set as a fixed modification and oxidation (Met) and N-terminal  
245 Acetylation as variable modifications. At most, five variable modifications per peptide were allowed. For  
246 each tandem spectrum, five *de novo* candidates were reported along with their Local Confidence Scores  
247 (the likelihood of each amino acid assignment in a *de novo* candidate peptide). This score was used to  
248 determine the accuracy of the *de novo* peptide sequences. The top *de novo* peptide for each spectrum  
249 was determined by the highest Average Local Confidence score (ALC) among the candidates for that  
250 spectrum.

#### 251 *Genome annotation*

252 Protein-coding genes were predicted by ExonHunter [33] , combining probabilistic models of sequence  
253 features with external evidence from alignments. As external evidence, we have used proteins from  
254 Octopus bimaculatus, Crassostrea gigas (Pacific oyster) and Lottia gigantea (Giant owl limpet) and

255 predicted proteins encoded by the transcriptomes of the three other oegopsid species analysed. These  
256 proteins were aligned to the genome by BLASTX. De-novo identified MS/MS-based peptides were  
257 initially also used as evidence, but these were later omitted due to low coverage. Evidence from  
258 predicted repeat locations was used to discourage the model to predict genes overlapping repeats.  
259 Initially, ExonHunter was run using Drosophila parameters on a randomly chosen subset of 118 contigs  
260 longer than 200kb (total length 199Mb). Out of 12,912 exons predicted in this run, 5,716 were  
261 supported by alignment data and selected to train parameters of the model for *A. dux*, using the  
262 methods described in [33]. The final predicted gene set using this model on the entire genome  
263 contained 51,225 protein-coding genes. The function of the protein-coding genes was inferred with  
264 Annocript 0.2 [34], which is based on the results from blastp [35] runs against the SwissProt (SP) and  
265 UniRef90 (Uf). In addition, we performed an rpsblast search using matrices from the conserved domain  
266 database (CDD) to annotate specific domains present on the protein queries.

267 Non-coding RNAs were annotated using the cmsearch program from INFERNAL 1.1 and the covariance  
268 models (CMs) from the Rfam database v12.0 [36,37]. All matches above the curated GA threshold were  
269 included. INFERNAL was selected because it implements the CMs that provide the most accurate  
270 bioinformatic annotation tool for ncRNAs available [38]. tRNA-scan v.1.3.1 was subsequently used to  
271 refine the annotation of tRNA genes (Table S3). The method uses a number of heuristics to increase the  
272 search-speed, annotates the Isoacceptor Type of each prediction, infers if predictions are likely to be  
273 functional or tRNA-derived pseudogenes [39,40]. This method uses CMs to identify tRNAs. Rfam  
274 matches and the tRNA-scan results for families belonging to the same clan were then “competed”, so  
275 that only the best match was retained for any genomic region [37].

#### 276 *Transposable element annotation*

277 Repetitive elements were identified using a bespoke pipeline. Firstly, elements were identified using  
278 RepeatMasker v.4.0.8 [41] with the eukaryota RepBase [42] repeat library. Low-complexity repeats were

279 ignored (-nolow) and a sensitive (-s) search was performed. Following this, a de novo repeat library was  
280 constructed using RepeatModeler v.1.0.11 [43] , including RECON v.1.08 [44] and RepeatScout v.1.0.5  
281 [45]. Novel repeats identified by RepeatModeler were analyzed with a 'BLAST, Extract, Extend' process  
282 to characterise elements along their entire length [46]. Consensus sequences and classification  
283 information for each repeat family were generated. The resulting de novo repeat library was utilized to  
284 identify repetitive elements using RepeatMasker.

## 285 Data analyses

### 286 *Comparative analyses of transposable elements*

287 We estimated the total repeat content of the giant squid genome to be approximately half its total size  
288 (~49.1%) (Figure 1, Supplementary Table S4). Out of all the repeats present in the giant squid genome,  
289 only a few were predicted to be small RNAs, satellites, simple or low complexity repeats (~0.89% of the  
290 total genome), with the vast majority (~48.21%) instead consisting of Transposable elements (TEs; i.e.  
291 SINEs, LINEs, LTR retrotransposons, and DNA transposons; Figure 1, Supplementary Table S4). Of the TE  
292 portion of the giant squid genome, the main contribution from annotated TEs is from DNA elements  
293 (11.06%) and LINEs (6.96%), with only a small contribution from SINEs (1.99%) and LTR elements  
294 (0.72%). TEs are a nearly universal feature of eukaryotic genomes, often comprising a large proportion  
295 of the total genomic DNA (e.g. the maize genome is ~85% TEs [47], stick insect genome is ~52% TEs [48],  
296 and the human genome is >45% TEs [49]), consequently these account for the majority of observed  
297 genome size variation among animals.

298 In Figure 1, we summarise the recently reported TE analyses performed on assembled cephalopod  
299 genomes, as follows: California two-spot octopus (*Octopus bimaculatus*) [11] and long-arm octopus (*O.*  
300 *minor*) [50], Hawaiian bobtail squid (*Euprymna scolopes*) [51], and giant squid (*Architeuthis dux*). The  
301 varying sequencing strategies employed to generate currently available cephalopod genomes (and  
302 accompanying variation in assembly quality) complicates the comparative analysis of TE content for this  
303 group. However, notwithstanding this caveat, it does seem clear that TEs make up a large fraction of the



304 total genomic content across all cephalopod genomes published to date (Figure 1). DNA transposons  
305 and LINEs dominate in available cephalopod genomes, while LTR elements and SINEs generally  
306 represent a minor portion of cephalopod TEs (Figure 1). Within decapod cephalopods (i.e. squid and  
307 cuttlefish), patterns in TE content are generally similar, however, the giant squid has a notably larger  
308 proportion of DNA transposons (1,626,482 elements, 11.06% of the total genome) than the Hawaiian  
309 bobtail squid (855,308 elements, 4.05% of the total genome), with the bobtail squid in turn having a  
310 similar proportion of LINEs (752,629 elements, 6.83% of the total genome) than the giant squid (766,382  
311 elements, 6.96% of the total genome; Figure 1).

312 The defining ability of TEs to mobilise, in other words, to transfer copies of themselves into other parts  
313 of the genome, can result in harmful mutations. However, TEs can also facilitate the generation of  
314 genomic novelty, and there is increasing evidence of their importance for the evolution of host-adaptive  
315 processes [52]. In the giant squid genome, all classes of TEs were more frequent (~38.23) in intergenic  
316 regions (here defined as regions >2kb upstream or downstream of an annotated gene), than in genic  
317 regions versus % of the genome in intergenic regions (~16.6%; Figure 2A). These findings are broadly  
318 similar to those reported for other cephalopods, although a larger proportion of the giant squid genome  
319 is composed of repeats located within genic regions (percentage of the genome represented by TEs for  
320 *O. bimaculoides*: ~6% genic versus ~30% intergenic, and for *O. minor* ~6% genic versus ~40% intergenic  
321 [50]).

322 A Kimura distance-based copy divergence analysis revealed that the most frequent TE sequence  
323 divergence relative to the TE consensus sequence in the giant squid genome was ~5-8% across all repeat  
324 classes, suggesting a relatively recent transposition burst across all major TE types (Figure 2B).  
325 Divergence peaks were most pronounced in LINE RTE elements, Tc/Mar and hAT DNA transposons, and  
326 unclassified TEs, with smaller divergence peaks in SINE tRNA elements and Penelope LINE elements  
327 (Figure 2B). Divergence peaks were most pronounced in LINE RTE elements, Tc/Mar and hAT DNA

328 transposons, and unclassified TEs, with smaller divergence peaks in SINE tRNA elements and Penelope  
329 LINE elements (Figure 2B). In comparison to observations from other cephalopods, these results suggest  
330 a shorter and more intense burst of recent TE activity in the giant squid genome. Overall, further  
331 genomic sampling within each of the cephalopod clades will be needed to understand TE evolution, as  
332 closely related species can show significant differences (*e.g.*, *O. bimaculoides* to *O. vulgaris*) [53].

### 333 *Non-coding RNAs*

334 We identified 50,598 ncRNA associated loci in the squid sequencing data, using curated homology-based  
335 probabilistic models from the Rfam database[54] and the specialized tRNAscan-SE transfer RNA  
336 annotation tool [39]. The essential and well conserved Metazoan ncRNAs: tRNAs, rRNAs (5S, 5.8S, SSU  
337 and LSU), RNase P, RNase MRP, SRP and the major spliceosomal snRNAs (U1, U2, U4, U5, U6), as well as  
338 the minor spliceosomal snRNAs (U11, U12, U4atac & U6atac), are all found in the *A. dux* genome. Some  
339 of the copy numbers associated with the core ncRNAs are extreme. For example, we identified: i)  
340 approximately 24,000 loci that appear to derive from 5S rRNA; ii) approximately 17,000 loci that are  
341 predicted to be tRNA derived; iii) approximately 3,200 Valine tRNAs isotypes and approximately 1,300  
342 U2 spliceosomal RNAs. The microRNA mir-598 also exhibits high copy-numbers at 172. Many of these  
343 are likely to be SINEs derived by transposition. All 20 tRNA isotypes were identified in *A. dux* genome.  
344 Again, many of these had relatively large copy numbers (summarised in Table 1). These ranged from 46  
345 (Cys) up to 2,541 (Val). We identified 174 loci that share homology with 34 known snoRNA families,  
346 these included 15 scaRNA, 41 H/ACA box and 118 C/D box snoRNA associated loci [10]. The snoRNAs are  
347 predominantly involved in rRNA maturation. We identified 7,049 loci that share homology with 283  
348 families of microRNA. Some of these may be of limited reliability, as CMs for simple hairpin structures  
349 can also match other, non-homologous, hairpin-like structures in the genome *e.g.* inverted repeats. A  
350 number of cis-regulatory elements were also identified. These included 235 hammerhead 1 ribozymes,  
351 133 Histone 30 UTR stem-loops, and 14 Potassium channel RNA editing signal sequences. There are very

352 few matches to obvious non-metazoan RNA families in the current assemblies. The only notable  
353 exceptions are babIM, IMES-2, PhotoRC-II and rspL. Each of these families are also found in marine  
354 metagenomic datasets, possibly explaining their presence as “contamination” from the environment.

355

### 356 *Analyses of specific gene families*

357 A number of gene families involved in development, such as transcription factors or signalling ligands,  
358 are highly conserved across metazoans and may therefore reveal signatures of genomic events, such as  
359 a whole genome duplication.

360 WNT is a family of secreted lipid-modified signaling glycoproteins with a key role during development  
361 [55]. Comparative analysis of molluscan genomes indicates that the ancestral state was 12 *WNT* genes,  
362 as *Wnt3* is absent in all protostomes examined thus far [56]. The giant squid has the typical 12  
363 lophotrochozoan WNTs (1, 2, 4, A, 5, 6, 7, 8, 9, 10, 11 and 16; Supplementary Figure S2), and therefore  
364 has retained the ancestral molluscan complement, including *Wnt8*, which is absent, for instance, in the  
365 genome of the slipper snail *Lottia gigantea* [57].

366 Protocadherins are a family of cell adhesion molecules that appear to play an important role in  
367 vertebrate brain development [58]. It is thought that they act as multimers at the cell surface in a  
368 manner akin to DSCAM in flies, which lack protocadherins [59]. Cephalopods have massively expanded  
369 this family, with 168 identified in the *O. bimaculoides* genome, whereas only 17-25 protocadherins have  
370 been identified in the genomes of annelids and non-cephalopod molluscs [11]. We identified  
371 approximately 135 protocadherin genes in *A. dux*, many of which are located in clusters in the genome.  
372 The possibility that this gene family plays a developmental role parallel to that of protocadherins in  
373 vertebrate neurodevelopment thus remains a compelling hypothesis.

374 Development organisation of the highly diverse body plans found in the Metazoa is controlled by a  
375 conserved cluster of homeotic genes, which includes, among others, the Hox genes. These are

376 characterized by a DNA sequence referred to as the homeobox, comprising 180 nucleotides that encode  
377 the homeodomain [60]. Hox genes are usually found in tight physical clusters in the genome and are  
378 sequentially expressed in the same chronological order as they are physically located in the DNA  
379 (temporal and spatial collinearity) [61]. Different combinations of Hox gene expression in the same  
380 tissue type can lead to a wide variety of different structures [62]. This makes the Hox genes a key subject  
381 for understanding the origins of the multitude of forms found in the cephalopods. In *Octopus*  
382 *bimaculoides* genome assembly no scaffold contained more than a single Hox gene, meaning that they  
383 are fully atomised [11]. However, in *Euprymna scolopes*, the Hox cluster was found spanning two  
384 scaffolds [51]. In the giant squid, we recovered a full Hox gene cluster in a single scaffold (Figure 3). The  
385 Hox gene organization found in the giant squid genome suggests either the presence of a disorganised  
386 cluster, so-called type D, or atomised clusters, type A [62], or possibly a combination of the two (the  
387 genes are still organized, but physically distant from each other). The existence of a "true" cluster seems  
388 unlikely, given the presence of other unrelated genes in between and the relatively large distances. The  
389 classification as type D (atomised) might seem most obvious, despite the co-presence of the genes in a  
390 single scaffold, due to these large distances. However, the definition of type A (disorganised) does allow  
391 for the presence of non-Hox genes in between members of the cluster. Thus, it is difficult to clearly  
392 categorise the recovered "cluster", but it does remain clear that these genes are not as tightly bundled  
393 as they are in other Bilateria lineages. The *A. dux* Hox "cluster" is spread across 11 Mb of a 38 Mb  
394 scaffold, and this suggests a far larger size range in the cephalopods than in other described animals, as  
395 recently suggested based on the genome of *Euprymna scolopes* [51]. It is possible that this is the reason  
396 for the apparent atomisation of Hox genes in the more fragmented *O. bimaculoides* assembly. Hox  
397 clusters are usually found in contigs of around 100 kb length in vertebrates [6, 7] and between 500 -  
398 10,000 kb in invertebrates [8] An assembled contig easily containing the complete cluster for these  
399 smaller cluster sizes, would manage to cover only one member of the Hox gene cluster in the studied

400 coleoids. As such, our results suggest that the Hox cluster may not be fully atomised in *O. bimaculoides*  
401 as previously hypothesised. Further improvements of genome assemblies in cephalopods will be  
402 required to address this question. The biological reason for this dramatic increase in the distance  
403 between the genes in the Hox cluster presents an intriguing avenue of future research. The  
404 homeodomain of all the obtained Hox genes in cephalopods were compared with those of other  
405 mollusks. Few differences were found relative to a previous study [63], as no significant modifications  
406 were observed in Hox 1, Hox 4, ANTP, Lox 2, Lox 5, Post 1 and Post 2. Hox 1 did, however, show reduced  
407 conservation in residues 22 to 25 in the *A. dux* sequence. This observation for Hox 1 in *A. dux* is visible  
408 only in the Pacbio assembly. Additionally, the Hox 3 homeodomain analysis supports a basal placement  
409 of the nautiloids within cephalopods. The Lox 4 gene was the most variable among all groups. As of to  
410 date, Hox 2 still remains undetected in the coleoid cephalopods [64]. Assembly errors notwithstanding,  
411 gain and loss of Hox genes has been attributed to fundamental changes in animal body plans, and the  
412 apparent loss of Hox 2 may therefore be significant. For example, Hox gene loss has been associated  
413 with the reduced body-plan segmentation of spider mites [42]. The circumstance that Hox 2 has been  
414 readily found in *Nautilus*, but remains undetected in all coleoids sequenced thus far, might signify an  
415 important developmental split within the Cephalopoda. Alternatively, and equally intriguing, this Hox  
416 gene may have undergone such drastic evolutionary modifications that it is presently undetectable by  
417 conventional means.

418 On a final note, we analyzed genes encoding reflectins, a class of cephalopod-specific proteins first  
419 described in *E. scolopes* [65]. Reflectins form flat structures that reflect ambient light (other marine  
420 animals use purine-based platelets), thus modulating iridescence for communication or camouflage  
421 purposes [66]. The giant squid genome contains 7 reflectin genes and 3 reflectin-like genes  
422 (Supplementary Figure S3). All of these genes, with the exception of 1 reflectin gene, appear on the

423 same scaffold, which corresponds very well with the distribution pattern of octopus reflectin genes  
424 [11]).

## 425 [Conclusions](#)

426 Not only because of its astonishing proportions, but also for the lack of knowledge of the key facets of  
427 its deep-sea lifestyle, the giant squid has long captured the imagination of scientists and the general  
428 public alike. With the release of this annotated giant squid genome, we set the stage for future research  
429 into the enigmas that enshroud this truly awe-inspiring creature. Further, given the paucity of available  
430 cephalopod genomes, we provide a valuable contribution to the genomic description of cephalopods,  
431 and more widely to the growing number of fields that are recognizing the potential, which this group of  
432 behaviourally advanced invertebrates holds for improving our understanding of the diversity of life on  
433 Earth in general.

## 434 [Availability of supporting data](#)

435 The data sets supporting the results of this article are available in the NCBI database a Bioproject  
436 PRJNA534469. The three transcriptome data sets (tsa) have ids GHKK01000000, GHKL01000000 and  
437 GHKH01000000 and the sequence data used for the genome assemblies has id VCCN01000000.

## 438 [Additional files](#)

439 Supplement.txt. Supplementary methods, tables and figures.

## 440 [Declarations](#)

## 441 [Abbreviations](#)

442 Gb: gigabase pairs; Mb: megabase pairs; BUSCO: Benchmarking Universal Single-copy Orthologs; bp:  
443 base pair; NCBI: National Center for Biotechnology Information; LC-MS/MS: liquid chromatography (LC)  
444 tandem mass spectrometry (MS); CCB: Colloidal Coomassie Brilliant Blue; HCD: higher-energy collisional

445 dissociation; NCE: normalized collisional energy; AGC: Automatic Gain Control; ALC: Average Local  
446 Confidence; SP: SwissProt; Uf: UniRef90; CDD: conserved domain database; CM: covariance model; TE:  
447 transposable element; LINE: Long interspersed nuclear element; SINE: Short interspersed nuclear  
448 element; LRT: long terminal repeat.

#### 449 Ethics statement

450 Sampling was following the recommendations from Moltschaniwskyj et al., 2007 [24].

#### 451 Consent for publication

452 Not applicable.

#### 453 Competing interests

454 The authors declare that they have no competing interests.

#### 455 Funding

456 R.R.F. thanks the Villum Fonden for grant VKR023446 (Villum Fonden Young Investigator Grant), the  
457 Portuguese Science Foundation (FCT) for grant PTDC/MAR/115347/2009;COMPETE-FCOMP-01-012;  
458 FEDER-015453, Marie Curie Actions (FP7-PEOPLE-2010-IEF, Proposal 272927), and the Danish National  
459 Research Foundation (DNRF96) for its funding of the Center for Macroecology, Evolution, and Climate.  
460 H.O. thanks the Rede Nacional de Espectrometria de Massa, ROTEIRO/0028/2013, ref. LISBOA-01-0145-  
461 FEDER-022125, supported by COMPETE and North Portugal Regional Operational Programme  
462 (Norte2020), under the PORTUGAL 2020 Partnership Agreement, through the European Regional  
463 Development Fund (ERDF). A.C. thanks FCT for project UID/Multi/04423/2019. M.P. acknowledges the  
464 support from the Wellcome Trust (grant number WT108749/Z/15/Z) and the European Molecular  
465 Biology Laboratory. M.P.T.G. thanks the Danish National Research Foundation for its funding of the  
466 Center for GeoGenetics (grant DNRF94) and Lundbeck Foundation for grant R52-5062 on Pathogen

467 Palaeogenomics. S.R. was supported by the Novo Nordisk Foundation grant NNF14CC0001. A.H. is  
468 supported by a Biotechnology and Biological Sciences Research Council David Phillips Fellowship  
469 [fellowship reference: BB/N020146/1]. T.B. is supported by the Biotechnology and Biological Sciences  
470 Research Council-funded South West Biosciences Doctoral Training Partnership [training grant reference  
471 BB/M009122/1]. This work was partially funded by the Lundbeck Foundation (R52-A4895 to BB).

472 HJTH was supported by the David and Lucile Packard Foundation, the Netherlands Organization for  
473 Scientific Research (#825.09.016) and currently by the Deutsche Forschungsgemeinschaft (DFG) under  
474 grant HO 5569/1-2 (Emmy Noether Junior Research Group). T.V. and B.Br. were supported by grants  
475 from the Slovak grant agency VEGA (1/0684/16, 1/0458/18). Computation for the work described in this  
476 paper was partially supported by the DeiC National Life Science Supercomputer at DTU.

#### 477 [Authors contributions](#)

478 R.D.F. and M.T.P.G. designed the study. J.S., H-J.H. AND R.T. carried out the sampling. Alex.C., A.R., B.F.,  
479 G.C.A.Jr, H.O. and I.W. performed the laboratory work. R.D.F., Alv.C., A.M., C.B.A., F.S., P.G., T.B., A.H.,  
480 I.B.H., C.C., B.P., F.P., M.P., F.M., O.S., S.R., M.Z.R. and D.P. analyzed the data. E.J., G.Z., J.V., O.F. and Q.L.  
481 contributed with genomic resources. R.D.F., L.F.C.C., A.A., Y.W., B.M., R.S., T.V., B.B., T.S-P., M.T.P.G.  
482 contributed with supervision and computational resources. R.R.F., T.S-P., R.N., M.T.P.G paid for  
483 sequencing. R.D.F. wrote the manuscript with contributions from all authors. All authors have read and  
484 approved the manuscript.

485

#### 486 [Acknowledgments](#)

487 We would like to thank: Anders Hansen, Tobias Mourier, Kristin Rós Kjartansdóttir and Lars Hestbjerg  
488 Hansen for help with generating sequencing data; Shawn Hoon for sharing transcriptome data; Annie  
489 Lingren for help with sample shipping; Peter Smith for providing samples and the support of the entire  
490 team at Dovetail.



491 **References**

- 492 1. Zullo L, Hochner B. A new perspective on the organization of an invertebrate brain. *Commun. Integr.*  
493 *Biol.* 2011;4:26–9.
- 494 2. Nixon M, Young JZ. *The brains and lives of cephalopods*. Oxford: Oxford University Press, Oxford;  
495 2003.
- 496 3. Doubleday ZA, Prowse TAA, Arkhipkin A, Pierce GJ, Semmens J, Steer M, et al. Global proliferation of  
497 cephalopods. *Curr. Biol.* 2016;26:R406–7.
- 498 4. Vecchione M, Allcock L, Piatkowski U, Jorgensen E, Barratt I. Persistent Elevated Abundance of  
499 Octopods in an Overfished Antarctic Area. *Smithson. Poles Contrib. to Int. Polar Year Sci.* 2009:197–204.
- 500 5. Young RE, Vecchione M, Mangold KM. Cephalopoda, Cuvier 1797. *Tree Life*. 2018. Available from:  
501 <http://tolweb.org/Cephalopoda/19386>
- 502 6. Roper CF, Sweeney MJ, Nauen CE. *FAO Species Catalogue Vol. 3. Cephalopods of the world. An*  
503 *annotated and illustrated catalogue of species of interest to fisheries*. *FAO Fish. Synopsis.* 1984;125:277.
- 504 7. Jereb P, Roper CFE. *Cephalopods of the world. An annotated and illustrated catalogue of cephalopod*  
505 *species known to date. Myopsid and Oegopsid Squids*. *FAO Species Cat. Fish. Purp.* 2010;2:605.
- 506 8. McClain CR, Balk MA, Benfield MC, Branch TA, Chen C, Cosgrove J, et al. Sizing ocean giants: patterns  
507 of intraspecific size variation in marine megafauna. *PeerJ.* 2015;3:e715.
- 508 9. Paxton CGM. Unleashing the Kraken: on the maximum length in giant squid (*Architeuthis* sp.). *J. Zool.*  
509 2016;300:82–8.
- 510 10. Rosa R, Seibel BA. Slow pace of life of the Antarctic colossal squid. *J. Mar. Biol. Assoc. United*  
511 *Kingdom.* 2010;90:1375–8.

- 512 11. Albertin CB, Simakov O, Mitros T, Wang ZY, Pungor JR, Edsinger-Gonzales E, et al. The octopus  
513 genome and the evolution of cephalopod neural and morphological novelties. *Nature*. 2015;524:220–4.
- 514 12. Liscovitch-Brauer N, Alon S, Porath HT, Elstein B, Unger R, Ziv T, et al. Trade-off between  
515 Transcriptome Plasticity and Genome Evolution in Cephalopods. *Cell*. 2017;169:191-202.e11.
- 516 13. Gilly WF, Beman JM, Litvin SY, Robison BH. Oceanographic and Biological Effects of Shoaling of the  
517 Oxygen Minimum Zone. *Ann. Rev. Mar. Sci.* 2013;5:393–420.
- 518 14. Golikov AV, Sabirov RM, Lubin PA, Jørgensen LL. Changes in distribution and range structure of Arctic  
519 cephalopods due to climatic changes of the last decades. *Biodiversity*. 2013;14:28–35.
- 520 15. Balmaseda MA, Trenberth KE, Källén E. Distinctive climate signals in reanalysis of global ocean heat  
521 content. *Geophys. Res. Lett.* 2013;40:1754–9.
- 522 16. Freeman D, Marshall B, Ahyong S, Wing S, Hitchmough R. Conservation status of New Zealand  
523 marine invertebrates, 2009. *New Zeal. J. Mar. Freshw. Res.* 2010;44:129–48.
- 524 17. Bustamante P, González AF, Rocha F, Miramand P, Guerra A. Metal and metalloid concentrations in  
525 the giant squid *Architeuthis dux* from Iberian waters. *Mar. Environ. Res.* 2008;66:278–87.
- 526 18. Unger MA, Harvey E, Vadas GG, Vecchione M. Persistent pollutants in nine species of deep-sea  
527 cephalopods. *Mar. Pollut. Bull.* 2008;56:1498–500.
- 528 19. Winkelmann I, Campos PF, Strugnell J, Cherel Y, Smith PJ, Kubodera T, et al. Mitochondrial genome  
529 diversity and population structure of the giant squid *Architeuthis*: genetics sheds new light on one of the  
530 most enigmatic marine species. *Proceedings. Biol. Sci.* 2013;280:20130273.
- 531 20. Chikhi R, Medvedev P. Informed and automated k-mer size selection for genome assembly.  
532 *Bioinformatics*. 2014;30:31–7.

- 533 21. Chapman J a, Ho I, Sunkara S, Luo S, Schroth GP, Rokhsar DS. Meraculous: de novo genome assembly  
534 with short paired-end reads. PLoS One. 2011;6:e23501.
- 535 22. Simão FA, Waterhouse RM, Ioannidis P, Kriventseva E V., Zdobnov EM. BUSCO: assessing genome  
536 assembly and annotation completeness with single-copy orthologs. Bioinformatics. 2015;31:3210–2.
- 537 23. English AC, Richards S, Han Y, Wang M, Vee V, Qu J, et al. Mind the Gap: Upgrading Genomes with  
538 Pacific Biosciences RS Long-Read Sequencing Technology. Liu Z, editor. PLoS One. 2012;7:e47768.
- 539 24. Moltschaniwskij NA, Hall K, Lipinski MR, Marian JEAR, Nishiguchi M, Sakai M, et al. Ethical and  
540 welfare considerations when using cephalopods as experimental animals. Rev. Fish Biol. Fish.  
541 2007;17:455–76.
- 542 25. Patel RK, Jain M. NGS QC Toolkit: A Toolkit for Quality Control of Next Generation Sequencing Data.  
543 Liu Z, editor. PLoS One. 2012;7:e30619.
- 544 26. Martin M. Cutadapt removes adapter sequences from high-throughput sequencing reads.  
545 EMBnet.journal. 2011;17:10–2.
- 546 27. Haas BJ, Papanicolaou A, Yassour M, Grabherr M, Blood PD, Bowden J, et al. De novo transcript  
547 sequence reconstruction from RNA-seq using the Trinity platform for reference generation and analysis.  
548 Nat. Protoc. 2013;8:1494–512.
- 549 28. Gilbert D. Gene-omes built from mRNA seq not genome DNA. Notre Dame: 7th annual arthropod  
550 genomics symposium; 2013. Available from: [http://globalhealth.nd.edu/7th-annual-arthropod-  
551 genomics-symposium/](http://globalhealth.nd.edu/7th-annual-arthropod-<br/>551 genomics-symposium/)
- 552 29. Kleffmann T, Russenberger D, von Zychlinski A, Christopher W, Sjölander K, Gruissem W, et al. The  
553 Arabidopsis thaliana chloroplast proteome reveals pathway abundance and novel protein functions.  
554 Curr. Biol. 2004;14:354–62.

- 555 30. Bradford MM. A rapid and sensitive method for the quantitation of microgram quantities of protein  
556 utilizing the principle of protein-dye binding. *Anal. Biochem.* 1976;72:248–54.
- 557 31. Santos R, da Costa G, Franco C, Gomes-Alves P, Flammang P, Coelho A V. First Insights into the  
558 Biochemistry of Tube Foot Adhesive from the Sea Urchin *Paracentrotus lividus* (Echinoidea,  
559 Echinodermata). *Mar. Biotechnol.* 2009;11:686–98.
- 560 32. Neuhoff V, Arold N, Taube D, Ehrhardt W. Improved staining of proteins in polyacrylamide gels  
561 including isoelectric focusing gels with clear background at nanogram sensitivity using Coomassie  
562 Brilliant Blue G-250 and R-250. *Electrophoresis.* 1988;9:255–62.
- 563 33. Brejová B, Vinar T, Chen Y, Wang S, Zhao G, Brown DG, et al. Finding genes in *Schistosoma*  
564 *japonicum*: annotating novel genomes with help of extrinsic evidence. *Nucleic Acids Res.* 2009;37:e52.
- 565 34. Musacchia F, Basu S, Petrosino G, Salvemini M, Sanges R. Annocript: a flexible pipeline for the  
566 annotation of transcriptomes able to identify putative long noncoding RNAs. *Bioinformatics.*  
567 2015;31:2199–201.
- 568 35. Camacho C, Coulouris G, Avagyan V, Ma N, Papadopoulos J, Bealer K, et al. BLAST+: architecture and  
569 applications. *BMC Bioinformatics.* 2009;10:421.
- 570 36. Burge SW, Daub J, Eberhardt R, Tate J, Barquist L, Nawrocki EP, et al. Rfam 11.0: 10 years of RNA  
571 families. *Nucleic Acids Res.* 2013;41:D226–32.
- 572 37. Gardner PP, Daub J, Tate J, Moore BL, Osuch IH, Griffiths-Jones S, et al. Rfam: Wikipedia, clans and  
573 the “decimal” release. *Nucleic Acids Res.* 2011;39:D141–5.
- 574 38. Freyhult EK, Bollback JP, Gardner PP. Exploring genomic dark matter: a critical assessment of the  
575 performance of homology search methods on noncoding RNA. *Genome Res.* 2007;17:117–25.

- 576 39. Chan PP, Lowe TM. GtRNAdb: a database of transfer RNA genes detected in genomic sequence.  
577 Nucleic Acids Res. 2009;37:D93–7.
- 578 40. Lowe TM, Eddy SR. tRNAscan-SE: a program for improved detection of transfer RNA genes in  
579 genomic sequence. Nucleic Acids Res. 1997;25:955–64.
- 580 41. Smit AFA, Hubley RR, Green PR. RepeatMasker Open-4.0. 2013.
- 581 42. Bao W, Kojima KK, Kohany O. Repbase Update, a database of repetitive elements in eukaryotic  
582 genomes. Mob. DNA. 2015;6:11.
- 583 43. Smit A, Hubley R. RepeatModeler Open-1.0. 2015.
- 584 44. Bao Z, Eddy SR. Automated de novo identification of repeat sequence families in sequenced  
585 genomes. Genome Res. 2002;12:1269–76.
- 586 45. Price AL, Jones NC, Pevzner PA. De novo identification of repeat families in large genomes.  
587 Bioinformatics. 2005;21:i351–8.
- 588 46. Platt RN, Blanco-Berdugo L, Ray DA. Accurate Transposable Element Annotation Is Vital When  
589 Analyzing New Genome Assemblies. Genome Biol. Evol. 2016;8:403–10.
- 590 47. Schnable PS, Ware D, Fulton RS, Stein JC, Wei F, Pasternak S, et al. The B73 Maize Genome:  
591 Complexity, Diversity, and Dynamics. Science. 2009;326:1112–5.
- 592 48. Wu C, Twort VG, Crowhurst RN, Newcomb RD, Buckley TR. Assembling large genomes: analysis of  
593 the stick insect (*Clitarchus hookeri*) genome reveals a high repeat content and sex-biased genes  
594 associated with reproduction. BMC Genomics. 2017;18:884.
- 595 49. Initial sequencing and analysis of the human genome. Nature. 2001;409:860–921.
- 596 50. Kim B-M, Kang S, Ahn D-H, Jung S-H, Rhee H, Yoo JS, et al. The genome of common long-arm octopus

597 Octopus minor. Gigascience. 2018;7.

598 51. Belcaid M, Casaburi G, McAnulty SJ, Schmidbaur H, Suria AM, Moriano-Gutierrez S, et al. Symbiotic  
599 organs shaped by distinct modes of genome evolution in cephalopods. Proc. Natl. Acad. Sci. U. S. A.  
600 2019;116:3030–5.

601 52. Schrader L, Schmitz J. The impact of transposable elements in adaptive evolution. Mol. Ecol.  
602 2018;28:1537-1549.

603 53. Zarrella I, Herten K, Maes GE, Tai S, Yang M, Seuntjens E, et al. The survey and reference assisted  
604 assembly of the Octopus vulgaris genome. Sci. Data. 2019;6:13.

605 54. Nawrocki EP, Burge SW, Bateman A, Daub J, Eberhardt RY, Eddy SR, et al. Rfam 12.0: updates to the  
606 RNA families database. Nucleic Acids Res. 2015;43:D130–7.

607 55. Cadigan KM, Nusse R. Wnt signaling: a common theme in animal development. Genes Dev.  
608 1997;11:3286–305.

609 56. Cho S-J, Valles Y, Giani VC, Seaver EC, Weisblat DA. Evolutionary Dynamics of the wnt Gene Family: A  
610 Lophotrochozoan Perspective. Mol. Biol. Evol. 2010;27:1645–58.

611 57. Simakov O, Marletaz F, Cho S-J, Edsinger-Gonzales E, Havlak P, Hellsten U, et al. Insights into  
612 bilaterian evolution from three spiralian genomes. Nature. 2012;493:526–31.

613 58. Chen W V, Maniatis T. Clustered protocadherins. Development. 2013;140:3297–302.

614 59. Zipursky SL, Sanes JR. Chemoaffinity revisited: dscams, protocadherins, and neural circuit assembly.  
615 Cell. 2010;143:343–53.

616 60. Pratihari S, Prasad Nath R, Kumar Kundu J. Hox genes and its role in animal development. Int. J.  
617 Science and Nature. 2010;1:101-103

- 618 61. Fröblius AC, Matus DQ, Seaver EC. Genomic Organization and Expression Demonstrate Spatial and  
619 Temporal Hox Gene Colinearity in the Lophotrochozoan *Capitella* sp. I. Butler G, editor. PLoS One.  
620 2008;3:e4004.
- 621 62. Mallo M, Wellik DM, Deschamps J. Hox genes and regional patterning of the vertebrate body plan.  
622 Dev. Biol. 2010;344:7–15.
- 623 63. Pernice M, Deutsch JS, Andouche A, Boucher-Rodoni R, Bonnaud L. Unexpected variation of Hox  
624 genes' homeodomains in cephalopods. Mol. Phylogenet. Evol. 2006;40:872–9.
- 625 64. Barucca M, Canapa A, Biscotti MA, Zappavigna V. An Overview of Hox Genes in Lophotrochozoa:  
626 Evolution and Functionality. J. Dev. Biol. 2016;4:1-15.
- 627 65. Crookes WJ, Ding L-L, Huang QL, Kimbell JR, Horwitz J, McFall-Ngai MJ. Reflectins: The Unusual  
628 Proteins of Squid Reflective Tissues. Science. 2004;303:235–8.
- 629 66. Wardill TJ, Gonzalez-Bellido PT, Crook RJ, Hanlon RT. Neural control of tuneable skin iridescence in  
630 squid. Proc. R. Soc. B Biol. Sci. 2012;279:4243–52.

631

632

634 **Table 1.** Statistics of the genome assembly, gene prediction and functional annotation of giant squid.  
 635 The transcript evidence was confirmed by blastp hits with e-value < 10E<sup>-6</sup> using the transcriptomes of  
 636 three other species of squid (see the “Transcriptome sequencing” section).

637

| Global Statistics                                           | Meraculous + Dovetail |
|-------------------------------------------------------------|-----------------------|
| <b>Genome assembly*</b>                                     |                       |
| Input assembly                                              | Meraculous            |
| Contig N50 length (Mb)                                      | 0.005                 |
| Longest contig (Mb)                                         | 0.120                 |
| Scaffold N50 length (Mb)                                    | 4.852                 |
| Longest scaffold (Mb)                                       | 32.889                |
| Total length (Gb)                                           | 2.693                 |
| <b>Busco statistics (<sup>1</sup>Euk / <sup>2</sup>Met)</b> |                       |
| Complete BUSCOs, (%)                                        | 86.1 / 88.5           |
| Complete and single-copy, (%)                               | 85.1 / 87.6           |
| Complete and duplicated, (%)                                | 1.0 / 0.9             |
| Partial, (%)                                                | 4.3 / 3.6             |
| Missing, (%)                                                | 9.6 / 7.9             |
| Total Buscos found, (%)                                     | 90.4 / 92.1           |
| <b>Genome annotation / Gene Prediction</b>                  |                       |
| Protein-coding gene number                                  | 51,225                |
| Transcript evidence                                         | 30,472                |
| Average Protein length, (aa)                                | 253                   |
| Longest Protein, (aa)                                       | 17,047                |
| Average CDS length, (bp)                                    | 758                   |
| Longest CDS, (bp)                                           | 51,138                |
| Average exon length, (bp)                                   | 186                   |



|                        |   |     |
|------------------------|---|-----|
| Average exons per gene | 4 | 638 |
|------------------------|---|-----|

---

**Functional annotation (Number of Hits)**

---

|           |        |
|-----------|--------|
| Swissprot | 15,749 |
|-----------|--------|

|          |        |
|----------|--------|
| Uniref90 | 29,553 |
|----------|--------|

|          |       |
|----------|-------|
| GO Terms | 4,712 |
|----------|-------|

|                                  |        |
|----------------------------------|--------|
| Conserved Domains Database (CDD) | 15,280 |
|----------------------------------|--------|

---

\*The presented statistics are to contigs/scaffolds with length  $\geq$  500 bp.

<sup>1</sup>Euk: Database of Eukaryota orthologs genes, containing a total of 303 BUSCO groups.

<sup>2</sup>Met: Database of Metazoa orthologs genes, containing a total of 978 BUSCO groups.

639

640

641

## 642 Figure legends

643 **Figure 1.** Comparison of genome repeat content among available cephalopod genomes with assembled  
644 genomes (repeat data for *O. minor* and *O. bimaculoides* from [50] and for *E. scolopes* from [51]). The  
645 tree indicates evolutionary relationships among the two available octopod cephalopods and the two  
646 available decapod cephalopods. Pie charts are scaled according to genome size (*O. bimaculoides*: 2.7Gb,  
647 *O. minor*: 5.09Gb, *E. scolopes*: 5.1Gb, *Architeuthis dux*: 2.7Gb), with different repeat types indicated by  
648 the colours presented in the key.

649 **Figure 2. A)** Stacked bar chart illustrating the proportions (expressed as percentage of the total genome)  
650 of repeats found in genic ( $\leq 2$ kb from an annotated gene) and intergenic regions ( $> 2$ kb from an  
651 annotated gene) for the giant squid genome. **B)** Transposable element (TE) accumulation history in the  
652 giant squid genome, based on a Kimura distance-based copy divergence analysis of TEs, with Kimura  
653 substitution level (CpG adjusted) illustrated on the x-axis, and percentage of the genome represented by  
654 each repeat type on the y-axis. Repeat type is indicated by the colour chart below the x-axis.

655 **Figure 3.** Schematic representation of the Hox gene cluster chromosomal organization in various  
656 invertebrates. Different scaffolds are separated by two slashes. Scaffold length is shown underneath.  
657 Unlike in other coleoids, for *Architeuthis dux* all Hox genes were found in the same scaffold. However,  
658 the distance between the genes was larger than expected for invertebrate organisms, and non-  
659 homeobox genes were also present within the cluster. Hox 2 remains undetected in coleoids.

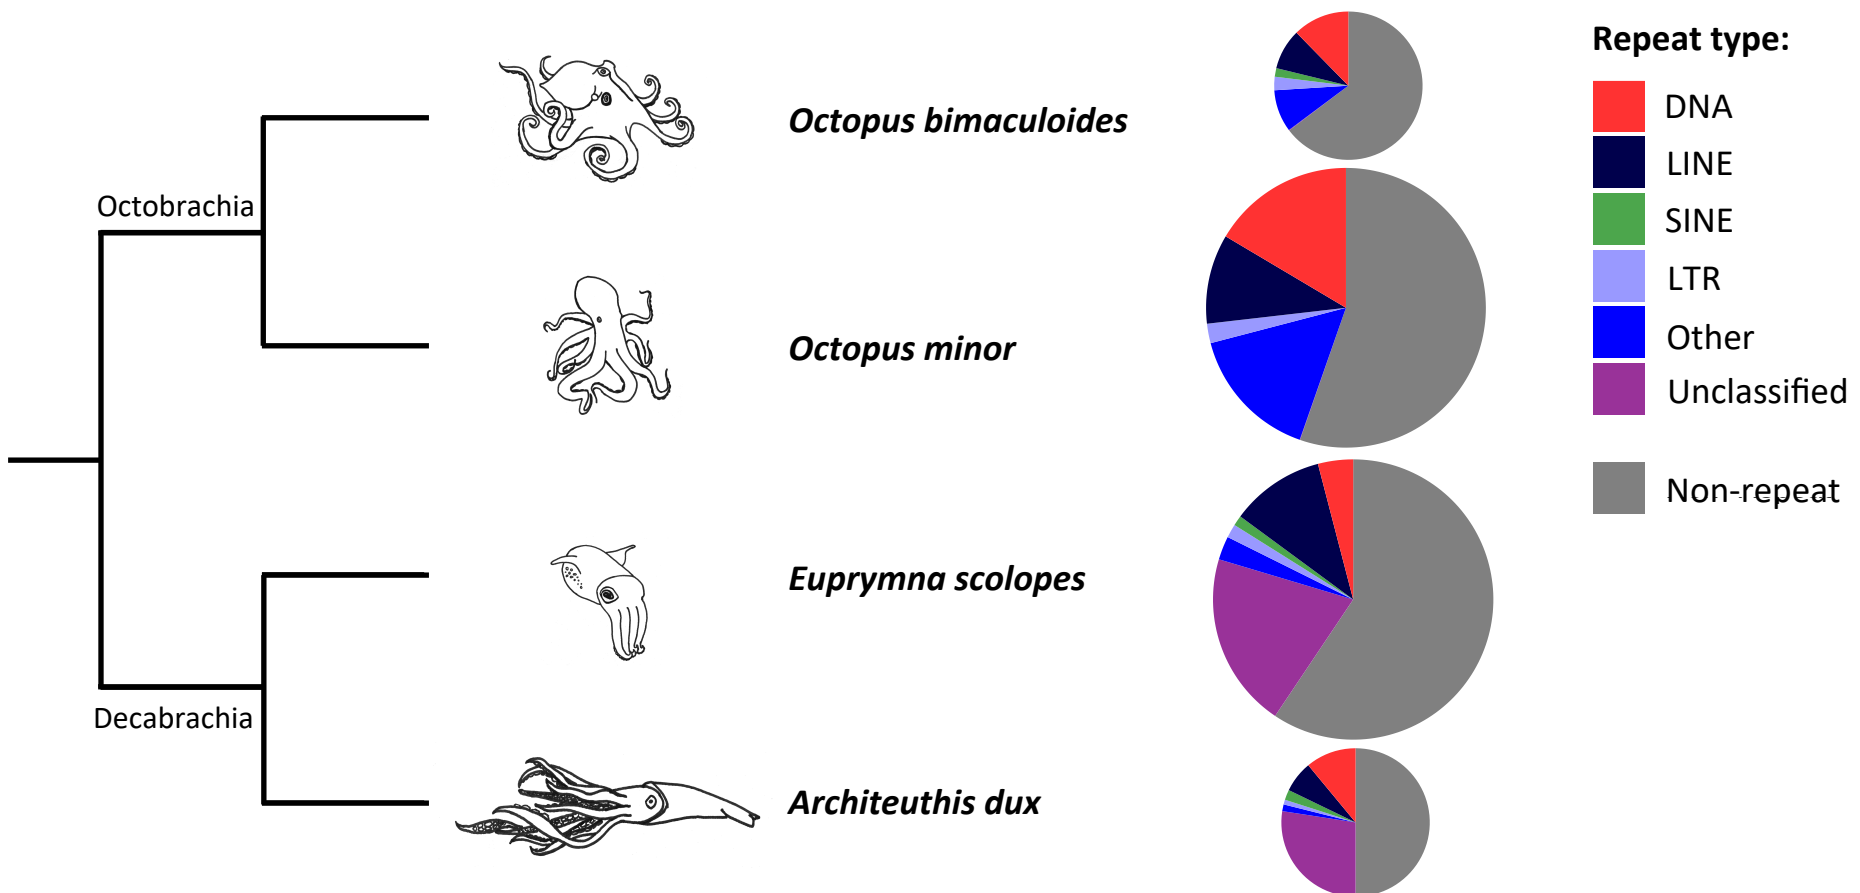

**A**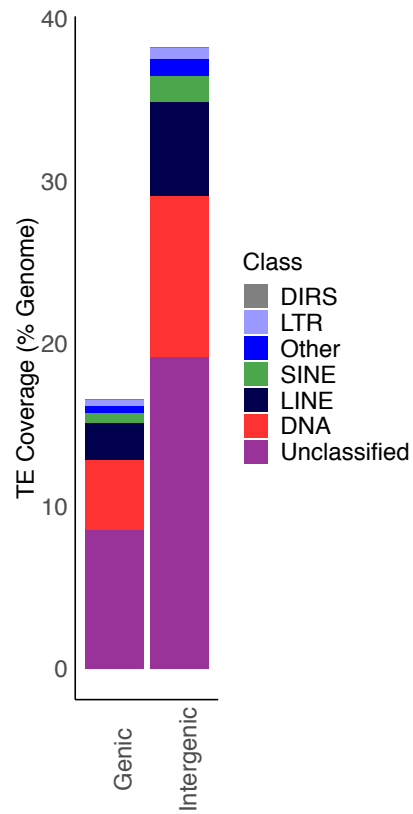**B**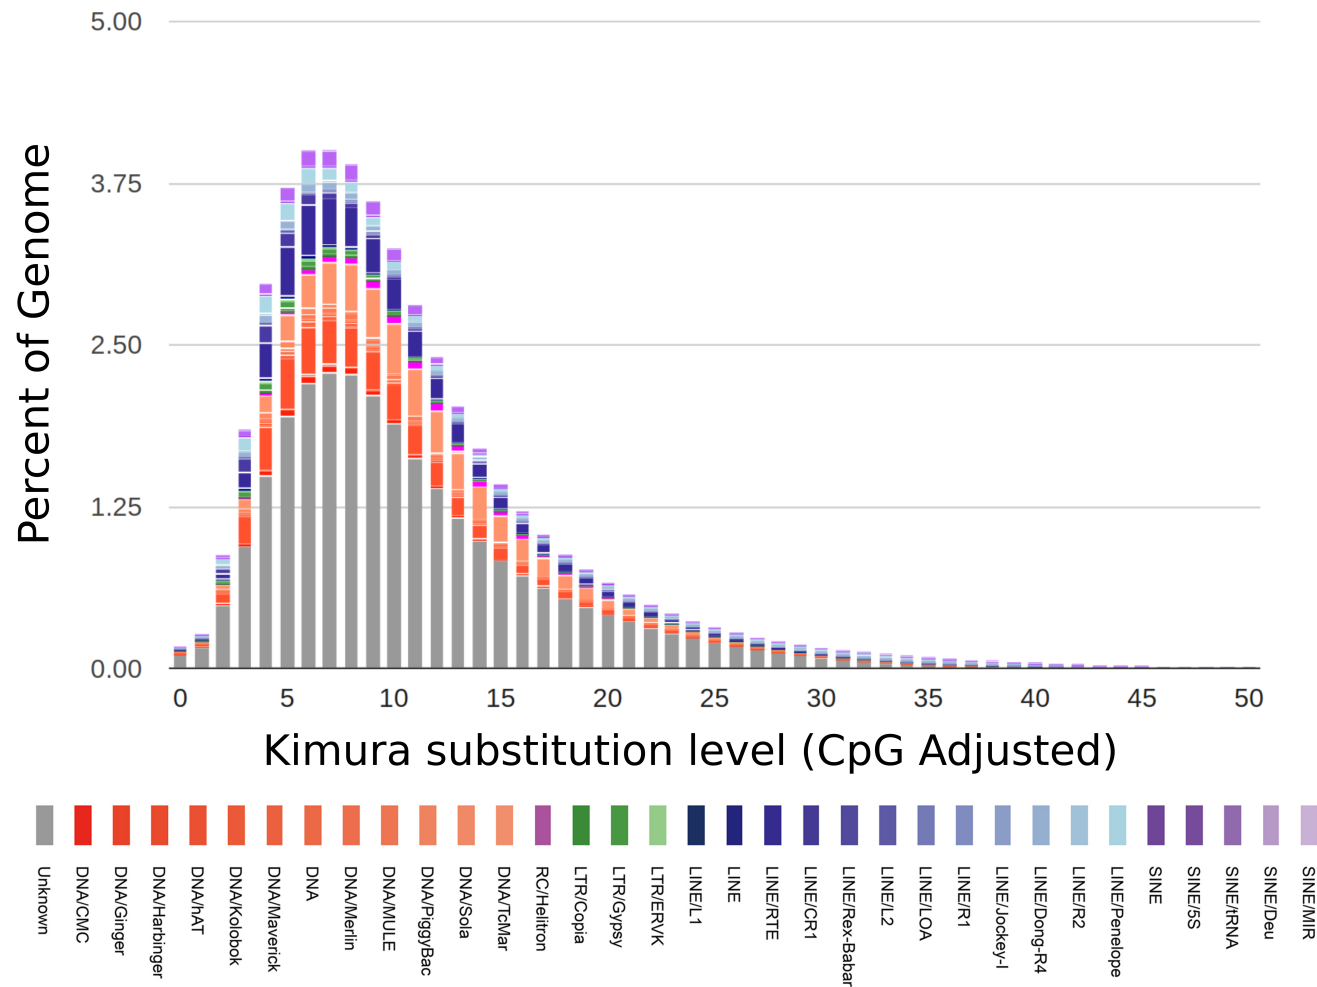

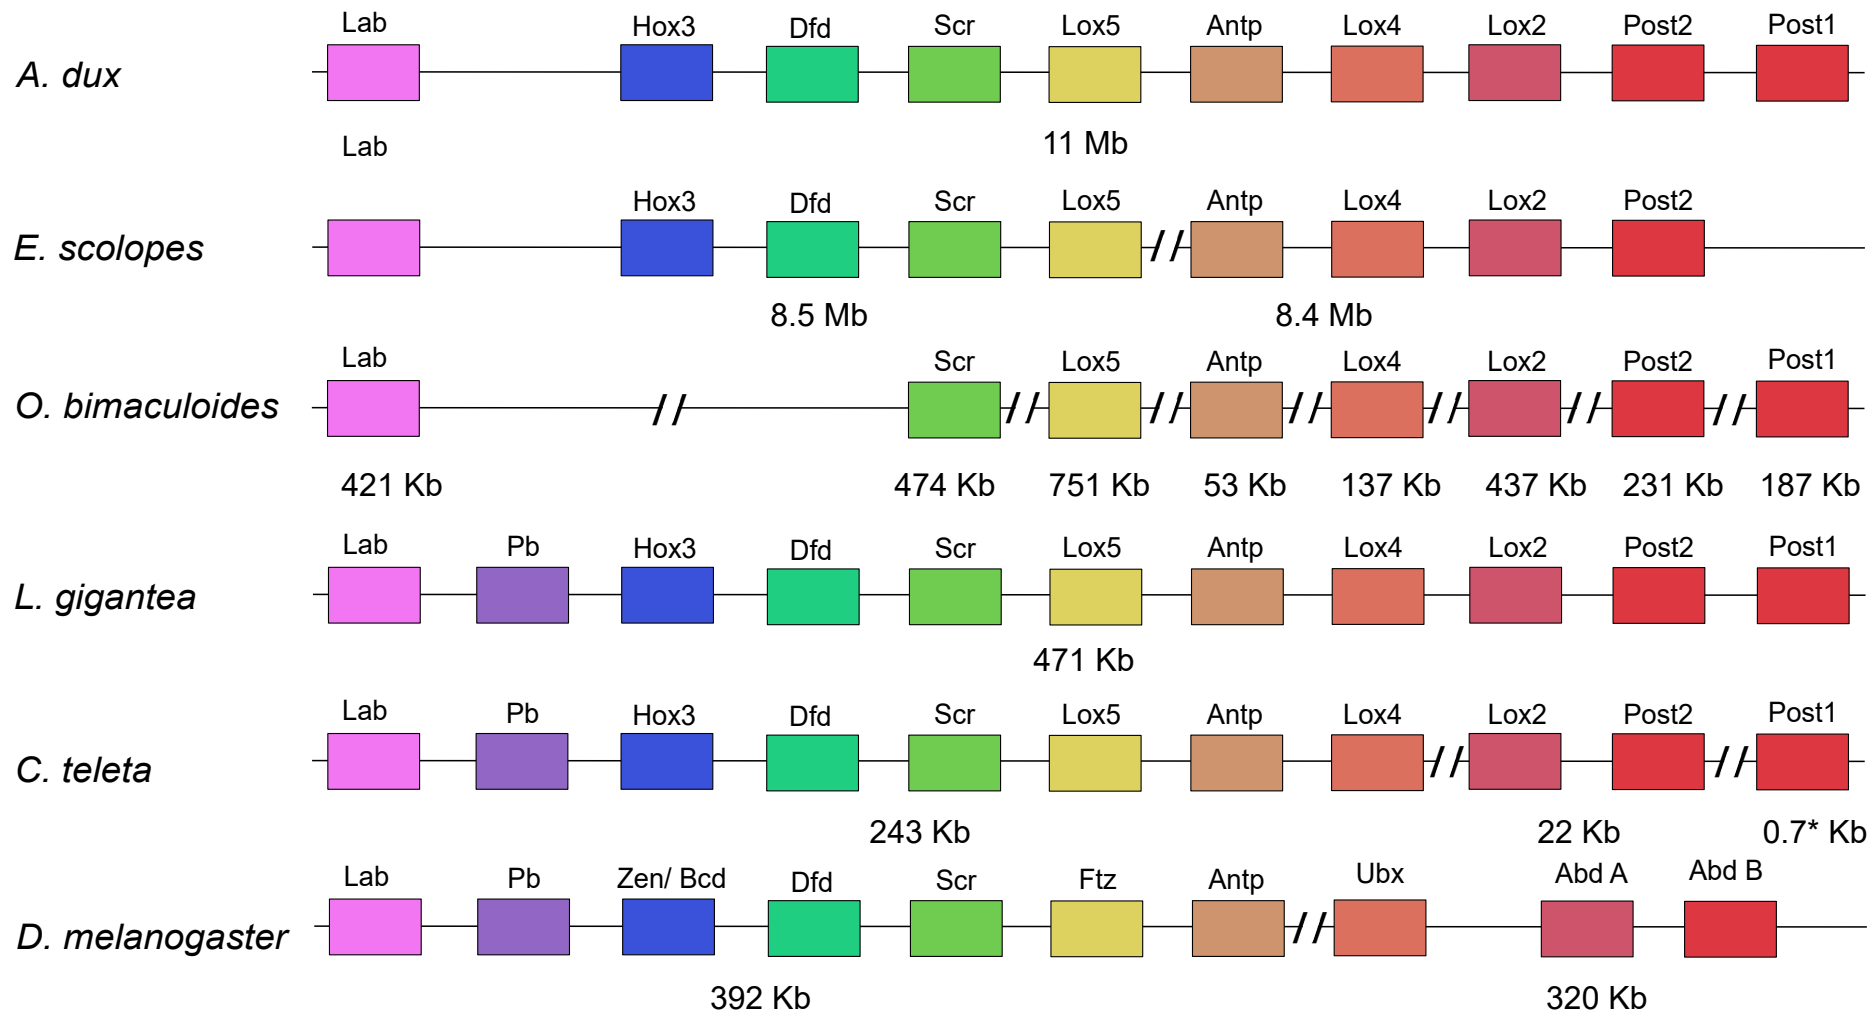

\*Gene size only.



Click here to access/download  
**Supplementary Material**  
RFonseca\_supplement.docx



Dear Editor,

We herewith submit our manuscript 'A draft genome sequence of the elusive giant squid, *Architeuthis dux*' as Data Note for your formal consideration as a publication in GigaScience.

We present a draft genome assembly with a scaffold N50 of 4.8 Mb (estimated genome size of 2.7 Gb) produced using Illumina, Moleculo and Chicago libraries. We also provide the corresponding gene, RNAs and transposable element annotations, as well as the results of a comparative genomics analyses with other available cephalopod genomes.

Besides providing the community with an important resource for further studying this enigmatic animal, given the paucity of available cephalopod genomes, this is a valuable contribution to the genomic description of cephalopods, and therefore we believe it has the potential to be published in GigaScience.

The sequence data and annotations have been submitted to the NCBI database as Bioproject PRJNA534469, which will be made available upon request from your journal.

We have no competing interests and all authors have approved the manuscript for submission.

We look forward to your assessment.

Best wishes,

Rute Fonseca on behalf of all the authors
