# Supplementary material for: A draft genome sequence of the elusive giant squid, Architeuthis dux
Source: Oxford University Press journal article supplement (doi:10.1093/gigascience/giz152), 2020-01-01
Supplement: giz152_giga-d-19-00236_revision_1.pdf [file giz152_giga-d-19-00236_revision_1.pdf]

|                             |                                                                                                                                                                                                                                                                                                                                                                                                                                                                                                                                                                                                                                                                                                                                                                                                                                                                             |                         |
|-----------------------------|-----------------------------------------------------------------------------------------------------------------------------------------------------------------------------------------------------------------------------------------------------------------------------------------------------------------------------------------------------------------------------------------------------------------------------------------------------------------------------------------------------------------------------------------------------------------------------------------------------------------------------------------------------------------------------------------------------------------------------------------------------------------------------------------------------------------------------------------------------------------------------|-------------------------|
| <b>Manuscript Number:</b>   | GIGA-D-19-00236R1                                                                                                                                                                                                                                                                                                                                                                                                                                                                                                                                                                                                                                                                                                                                                                                                                                                           |                         |
| <b>Full Title:</b>          | A draft genome sequence of the elusive giant squid, <i>Architeuthis dux</i>                                                                                                                                                                                                                                                                                                                                                                                                                                                                                                                                                                                                                                                                                                                                                                                                 |                         |
| <b>Article Type:</b>        | Data Note                                                                                                                                                                                                                                                                                                                                                                                                                                                                                                                                                                                                                                                                                                                                                                                                                                                                   |                         |
| <b>Funding Information:</b> | Villum Fonden (VKR023446)                                                                                                                                                                                                                                                                                                                                                                                                                                                                                                                                                                                                                                                                                                                                                                                                                                                   | Dr Rute R. da Fonseca   |
|                             | FP7 People: Marie-Curie Actions (272927)                                                                                                                                                                                                                                                                                                                                                                                                                                                                                                                                                                                                                                                                                                                                                                                                                                    | Dr Rute R. da Fonseca   |
|                             | Fundação para a Ciência e a Tecnologia (PTDC/MAR/115347/2009)                                                                                                                                                                                                                                                                                                                                                                                                                                                                                                                                                                                                                                                                                                                                                                                                               | Dr Rute R. da Fonseca   |
|                             | Danmarks Grundforskningsfond (DNRF96)                                                                                                                                                                                                                                                                                                                                                                                                                                                                                                                                                                                                                                                                                                                                                                                                                                       | Dr Rute R. da Fonseca   |
|                             | Programa Operacional Temático Factores de Competitividade (PT) (COMPETE-FCOMP-01-012)                                                                                                                                                                                                                                                                                                                                                                                                                                                                                                                                                                                                                                                                                                                                                                                       | Dr Rute R. da Fonseca   |
|                             | Rede Nacional de Espectrometria de Massa (ROTEIRO/0028/2013)                                                                                                                                                                                                                                                                                                                                                                                                                                                                                                                                                                                                                                                                                                                                                                                                                | Dr Hugo Osório          |
|                             | Fundação para a Ciência e a Tecnologia (UID/Multi/04423/2019)                                                                                                                                                                                                                                                                                                                                                                                                                                                                                                                                                                                                                                                                                                                                                                                                               | Dr Alexandre Campos     |
|                             | Wellcome Trust (WT108749/Z/15/Z)                                                                                                                                                                                                                                                                                                                                                                                                                                                                                                                                                                                                                                                                                                                                                                                                                                            | Dr Mateus Patricio      |
|                             | Danmarks Grundforskningsfond (DNRF94)                                                                                                                                                                                                                                                                                                                                                                                                                                                                                                                                                                                                                                                                                                                                                                                                                                       | Dr M. Thomas P. Gilbert |
|                             | Lundbeckfonden (R52-5062)                                                                                                                                                                                                                                                                                                                                                                                                                                                                                                                                                                                                                                                                                                                                                                                                                                                   | Dr M. Thomas P. Gilbert |
|                             | Novo Nordisk Fonden (NNF14CC0001)                                                                                                                                                                                                                                                                                                                                                                                                                                                                                                                                                                                                                                                                                                                                                                                                                                           | Dr Simon Rasmussen      |
|                             | Biotechnology and Biological Sciences Research Council (BB/N020146/1)                                                                                                                                                                                                                                                                                                                                                                                                                                                                                                                                                                                                                                                                                                                                                                                                       | Dr Alex Hayward         |
|                             | Biotechnology and Biological Sciences Research Council (BB/M009122/1)                                                                                                                                                                                                                                                                                                                                                                                                                                                                                                                                                                                                                                                                                                                                                                                                       | Dr Tobias Baril         |
|                             | Lundbeckfonden (R52-A4895)                                                                                                                                                                                                                                                                                                                                                                                                                                                                                                                                                                                                                                                                                                                                                                                                                                                  | Dr Blagoy Blagoev       |
|                             | Nederlandse Organisatie voor Wetenschappelijk Onderzoek (NL) (#825.09.016)                                                                                                                                                                                                                                                                                                                                                                                                                                                                                                                                                                                                                                                                                                                                                                                                  | Dr Henk-Jan Hoving      |
|                             | Deutsche Forschungsgemeinschaft (DE) (HO 5569/1-2)                                                                                                                                                                                                                                                                                                                                                                                                                                                                                                                                                                                                                                                                                                                                                                                                                          | Dr Henk-Jan Hoving      |
|                             | Slovak grant agency VEGA (VEGA 1/0684/16)                                                                                                                                                                                                                                                                                                                                                                                                                                                                                                                                                                                                                                                                                                                                                                                                                                   | Dr Brona Brejova        |
|                             | Slovak grant agency VEGA (VEGA 1/0458/18)                                                                                                                                                                                                                                                                                                                                                                                                                                                                                                                                                                                                                                                                                                                                                                                                                                   | Dr Tomas Vinar          |
| <b>Abstract:</b>            | <p><b>Background</b></p> <p>The giant squid (<i>Architeuthis dux</i>; Steenstrup, 1857) is an enigmatic giant mollusk with a circumglobal distribution in the deep ocean, except in the high Arctic and Antarctic waters. The elusiveness of the species makes it difficult to study. Thus, having a genome assembled for this deep-sea dwelling species will allow unlocking several pending evolutionary questions. Findings</p> <p>We present a draft genome assembly that includes 200 Gb of Illumina reads, 4 Gb of Moleculo synthetic long-reads and 108 Gb of Chicago libraries, with a final size matching the estimated genome size of 2.7 Gb, and a scaffold N50 of 4.8 Mb. We also present an alternative assembly including 27 Gb raw reads generated using the Pacific Biosciences platform. In addition, we sequenced the proteome of the same individual</p> |                         |

|                                                      |                                                                                                                                                                                                                                                                                                                                                                                                                                                                                                                                                                                                                      |
|------------------------------------------------------|----------------------------------------------------------------------------------------------------------------------------------------------------------------------------------------------------------------------------------------------------------------------------------------------------------------------------------------------------------------------------------------------------------------------------------------------------------------------------------------------------------------------------------------------------------------------------------------------------------------------|
|                                                      | <p>and RNA from three different tissue types from three other species of squid species (<i>Onychoteuthis banksii</i>, <i>Dosidicus gigas</i>, and <i>Sthenoteuthis oualaniensis</i>) to assist genome annotation. We annotated 33,406 protein coding genes supported by evidence and the genome completeness estimated by BUSCO reached 92%. Repetitive regions cover 49.17% of the genome. Conclusions</p> <p>This annotated draft genome of <i>A. dux</i> provides a critical resource to investigate the unique traits of this species, including its gigantism and key adaptations to deep-sea environments.</p> |
| <b>Corresponding Author:</b>                         | Rute R. da Fonseca<br>University of Copenhagen<br>Copenhagen, DENMARK                                                                                                                                                                                                                                                                                                                                                                                                                                                                                                                                                |
| <b>Corresponding Author Secondary Information:</b>   |                                                                                                                                                                                                                                                                                                                                                                                                                                                                                                                                                                                                                      |
| <b>Corresponding Author's Institution:</b>           | University of Copenhagen                                                                                                                                                                                                                                                                                                                                                                                                                                                                                                                                                                                             |
| <b>Corresponding Author's Secondary Institution:</b> |                                                                                                                                                                                                                                                                                                                                                                                                                                                                                                                                                                                                                      |
| <b>First Author:</b>                                 | Rute R. da Fonseca                                                                                                                                                                                                                                                                                                                                                                                                                                                                                                                                                                                                   |
| <b>First Author Secondary Information:</b>           |                                                                                                                                                                                                                                                                                                                                                                                                                                                                                                                                                                                                                      |
| <b>Order of Authors:</b>                             | Rute R. da Fonseca                                                                                                                                                                                                                                                                                                                                                                                                                                                                                                                                                                                                   |
|                                                      | Alvarina Couto                                                                                                                                                                                                                                                                                                                                                                                                                                                                                                                                                                                                       |
|                                                      | Andre Machado                                                                                                                                                                                                                                                                                                                                                                                                                                                                                                                                                                                                        |
|                                                      | Brona Brejova                                                                                                                                                                                                                                                                                                                                                                                                                                                                                                                                                                                                        |
|                                                      | Caroline B. Albertin                                                                                                                                                                                                                                                                                                                                                                                                                                                                                                                                                                                                 |
|                                                      | Filipe Silva                                                                                                                                                                                                                                                                                                                                                                                                                                                                                                                                                                                                         |
|                                                      | Paul Gardner                                                                                                                                                                                                                                                                                                                                                                                                                                                                                                                                                                                                         |
|                                                      | Tobias Baril                                                                                                                                                                                                                                                                                                                                                                                                                                                                                                                                                                                                         |
|                                                      | Alex Hayward                                                                                                                                                                                                                                                                                                                                                                                                                                                                                                                                                                                                         |
|                                                      | Alexandre Campos                                                                                                                                                                                                                                                                                                                                                                                                                                                                                                                                                                                                     |
|                                                      | Angela Ribeiro                                                                                                                                                                                                                                                                                                                                                                                                                                                                                                                                                                                                       |
|                                                      | Inigo Barrio Hernandez                                                                                                                                                                                                                                                                                                                                                                                                                                                                                                                                                                                               |
|                                                      | Henk-Jan Hoving                                                                                                                                                                                                                                                                                                                                                                                                                                                                                                                                                                                                      |
|                                                      | Ricardo Tafur-Jimenez                                                                                                                                                                                                                                                                                                                                                                                                                                                                                                                                                                                                |
|                                                      | Chong Chu                                                                                                                                                                                                                                                                                                                                                                                                                                                                                                                                                                                                            |
|                                                      | Barbara Frazão                                                                                                                                                                                                                                                                                                                                                                                                                                                                                                                                                                                                       |
|                                                      | Bent Petersen                                                                                                                                                                                                                                                                                                                                                                                                                                                                                                                                                                                                        |
|                                                      | Fernando Peñaloza                                                                                                                                                                                                                                                                                                                                                                                                                                                                                                                                                                                                    |
|                                                      | Francesco Musacchia                                                                                                                                                                                                                                                                                                                                                                                                                                                                                                                                                                                                  |
|                                                      | Graham C. Alexander Jr.                                                                                                                                                                                                                                                                                                                                                                                                                                                                                                                                                                                              |
|                                                      | Hugo Osório                                                                                                                                                                                                                                                                                                                                                                                                                                                                                                                                                                                                          |
|                                                      | Inger Winkelmann                                                                                                                                                                                                                                                                                                                                                                                                                                                                                                                                                                                                     |
|                                                      | Oleg Simakov                                                                                                                                                                                                                                                                                                                                                                                                                                                                                                                                                                                                         |
|                                                      | Simon Rasmussen                                                                                                                                                                                                                                                                                                                                                                                                                                                                                                                                                                                                      |
|                                                      | M. Ziaur Rahman                                                                                                                                                                                                                                                                                                                                                                                                                                                                                                                                                                                                      |
|                                                      |                                                                                                                                                                                                                                                                                                                                                                                                                                                                                                                                                                                                                      |

|                                                |                                                                                                                                                                                                                                                                                                                                                                                                                                                                                                                                                                                                                                                                                                                                                                                                                                                                                                                                                                                                                                                                                                                                                                                                                                                                                                                                                                                                                                                                                                                                                                                                                                                                                                                                                                                                                                                                                                                                                       |
|------------------------------------------------|-------------------------------------------------------------------------------------------------------------------------------------------------------------------------------------------------------------------------------------------------------------------------------------------------------------------------------------------------------------------------------------------------------------------------------------------------------------------------------------------------------------------------------------------------------------------------------------------------------------------------------------------------------------------------------------------------------------------------------------------------------------------------------------------------------------------------------------------------------------------------------------------------------------------------------------------------------------------------------------------------------------------------------------------------------------------------------------------------------------------------------------------------------------------------------------------------------------------------------------------------------------------------------------------------------------------------------------------------------------------------------------------------------------------------------------------------------------------------------------------------------------------------------------------------------------------------------------------------------------------------------------------------------------------------------------------------------------------------------------------------------------------------------------------------------------------------------------------------------------------------------------------------------------------------------------------------------|
|                                                | Davide Pisani                                                                                                                                                                                                                                                                                                                                                                                                                                                                                                                                                                                                                                                                                                                                                                                                                                                                                                                                                                                                                                                                                                                                                                                                                                                                                                                                                                                                                                                                                                                                                                                                                                                                                                                                                                                                                                                                                                                                         |
|                                                | Erich Jarvis                                                                                                                                                                                                                                                                                                                                                                                                                                                                                                                                                                                                                                                                                                                                                                                                                                                                                                                                                                                                                                                                                                                                                                                                                                                                                                                                                                                                                                                                                                                                                                                                                                                                                                                                                                                                                                                                                                                                          |
|                                                | Guojie Zhang                                                                                                                                                                                                                                                                                                                                                                                                                                                                                                                                                                                                                                                                                                                                                                                                                                                                                                                                                                                                                                                                                                                                                                                                                                                                                                                                                                                                                                                                                                                                                                                                                                                                                                                                                                                                                                                                                                                                          |
|                                                | Jakob Vinther                                                                                                                                                                                                                                                                                                                                                                                                                                                                                                                                                                                                                                                                                                                                                                                                                                                                                                                                                                                                                                                                                                                                                                                                                                                                                                                                                                                                                                                                                                                                                                                                                                                                                                                                                                                                                                                                                                                                         |
|                                                | Jan Strugnell                                                                                                                                                                                                                                                                                                                                                                                                                                                                                                                                                                                                                                                                                                                                                                                                                                                                                                                                                                                                                                                                                                                                                                                                                                                                                                                                                                                                                                                                                                                                                                                                                                                                                                                                                                                                                                                                                                                                         |
|                                                | L. Filipe C. Castro                                                                                                                                                                                                                                                                                                                                                                                                                                                                                                                                                                                                                                                                                                                                                                                                                                                                                                                                                                                                                                                                                                                                                                                                                                                                                                                                                                                                                                                                                                                                                                                                                                                                                                                                                                                                                                                                                                                                   |
|                                                | Olivier Fedrigo                                                                                                                                                                                                                                                                                                                                                                                                                                                                                                                                                                                                                                                                                                                                                                                                                                                                                                                                                                                                                                                                                                                                                                                                                                                                                                                                                                                                                                                                                                                                                                                                                                                                                                                                                                                                                                                                                                                                       |
|                                                | Mateus Patricio                                                                                                                                                                                                                                                                                                                                                                                                                                                                                                                                                                                                                                                                                                                                                                                                                                                                                                                                                                                                                                                                                                                                                                                                                                                                                                                                                                                                                                                                                                                                                                                                                                                                                                                                                                                                                                                                                                                                       |
|                                                | Qiyi Li                                                                                                                                                                                                                                                                                                                                                                                                                                                                                                                                                                                                                                                                                                                                                                                                                                                                                                                                                                                                                                                                                                                                                                                                                                                                                                                                                                                                                                                                                                                                                                                                                                                                                                                                                                                                                                                                                                                                               |
|                                                | Sara Rocha                                                                                                                                                                                                                                                                                                                                                                                                                                                                                                                                                                                                                                                                                                                                                                                                                                                                                                                                                                                                                                                                                                                                                                                                                                                                                                                                                                                                                                                                                                                                                                                                                                                                                                                                                                                                                                                                                                                                            |
|                                                | Agostinho Antunes                                                                                                                                                                                                                                                                                                                                                                                                                                                                                                                                                                                                                                                                                                                                                                                                                                                                                                                                                                                                                                                                                                                                                                                                                                                                                                                                                                                                                                                                                                                                                                                                                                                                                                                                                                                                                                                                                                                                     |
|                                                | Yufeng Wu                                                                                                                                                                                                                                                                                                                                                                                                                                                                                                                                                                                                                                                                                                                                                                                                                                                                                                                                                                                                                                                                                                                                                                                                                                                                                                                                                                                                                                                                                                                                                                                                                                                                                                                                                                                                                                                                                                                                             |
|                                                | Bin Ma                                                                                                                                                                                                                                                                                                                                                                                                                                                                                                                                                                                                                                                                                                                                                                                                                                                                                                                                                                                                                                                                                                                                                                                                                                                                                                                                                                                                                                                                                                                                                                                                                                                                                                                                                                                                                                                                                                                                                |
|                                                | Remo Sanges                                                                                                                                                                                                                                                                                                                                                                                                                                                                                                                                                                                                                                                                                                                                                                                                                                                                                                                                                                                                                                                                                                                                                                                                                                                                                                                                                                                                                                                                                                                                                                                                                                                                                                                                                                                                                                                                                                                                           |
|                                                | Tomas Vinar                                                                                                                                                                                                                                                                                                                                                                                                                                                                                                                                                                                                                                                                                                                                                                                                                                                                                                                                                                                                                                                                                                                                                                                                                                                                                                                                                                                                                                                                                                                                                                                                                                                                                                                                                                                                                                                                                                                                           |
|                                                | Blagoy Blagoev                                                                                                                                                                                                                                                                                                                                                                                                                                                                                                                                                                                                                                                                                                                                                                                                                                                                                                                                                                                                                                                                                                                                                                                                                                                                                                                                                                                                                                                                                                                                                                                                                                                                                                                                                                                                                                                                                                                                        |
|                                                | Thomas Sicheritz-Ponten                                                                                                                                                                                                                                                                                                                                                                                                                                                                                                                                                                                                                                                                                                                                                                                                                                                                                                                                                                                                                                                                                                                                                                                                                                                                                                                                                                                                                                                                                                                                                                                                                                                                                                                                                                                                                                                                                                                               |
|                                                | Rasmus Nielsen                                                                                                                                                                                                                                                                                                                                                                                                                                                                                                                                                                                                                                                                                                                                                                                                                                                                                                                                                                                                                                                                                                                                                                                                                                                                                                                                                                                                                                                                                                                                                                                                                                                                                                                                                                                                                                                                                                                                        |
|                                                | M. Thomas P. Gilbert                                                                                                                                                                                                                                                                                                                                                                                                                                                                                                                                                                                                                                                                                                                                                                                                                                                                                                                                                                                                                                                                                                                                                                                                                                                                                                                                                                                                                                                                                                                                                                                                                                                                                                                                                                                                                                                                                                                                  |
| <b>Order of Authors Secondary Information:</b> |                                                                                                                                                                                                                                                                                                                                                                                                                                                                                                                                                                                                                                                                                                                                                                                                                                                                                                                                                                                                                                                                                                                                                                                                                                                                                                                                                                                                                                                                                                                                                                                                                                                                                                                                                                                                                                                                                                                                                       |
| <b>Response to Reviewers:</b>                  | <p>Dear Editor,</p> <p>We herewith submit our revised manuscript 'A draft genome sequence of the elusive giant squid, <i>Architeuthis dux</i>'.</p> <p>Regarding the points that you have highlighted, please find the answers below:</p> <p>1) Please clarify the rationale for the unconventional assembly strategy in the revised manuscript. If this has "historic" rather than scientific reasons, the reviewer feels this may be fine, but I agree that the reasons should be discussed in the manuscript, for the benefit of readers who are looking for best practice examples.</p> <p>The reviewer is correct that there is some degree of history involved. We initially did the assembly without PacBio, and did the presented analyses on this. Later we were offered the chance to try and improve it with PacBio, which we did, but as you can see there was minimal improvement in the assembly statistics (Table 1 and Table S2), but i) an increase of the total genome size to 3.155 Gb, beyond the expected 2.7 Gb estimated in kmergenie, and ii) a slight decrease in the BUSCO completeness assessment. As such, we elected to retain the results based on the original assembly (based on Dovetail), but given that we assume others may wish to use the alternative assembly and explore the differences, we provide both.</p> <p>In the beginning of the "Data analyses" section, we now clearly state which assembly was used in the comparative genomics analyses (from Line 297) and provide an explanation for that choice.</p> <p>2) Please expand on the methods for protein-coding gene modelling and have another look at your data whether 50K genes may be an overestimate. I also agree with the reviewer's recommendation to analyze gene models in BUSCO to give readers a better idea of their completeness.</p> <p>We now expanded the section detailing the filtering of the protein-coding gene set and</p> |

present a total of 33,406 gene annotations in the final set, as these have validation by matching to cephalopod transcripts and/or SwissProt/UniRef90 proteins. We also provide the results from BUSCO when using the gene models as input for comparison (added to Table 1).

Answers to the reviewer's comments:

Reviewer #1: In this study, de Fonseca et al. report the genome of the giant squid as a resource to investigate the unique traits of this fascinating organism. Two assemblies, which are of comparable contiguity to most other recently published molluscan genomes, as well as a set of over 51,000 gene models are reported. Analysis of the genome focuses on repetitive elements (e.g., TEs), non-coding RNAs, and gene families of interest to the authors (WNT genes, Protocadherins, Hox genes, and reflectins). Overall this is a straightforward study that provides a resource that will be broadly useful and I feel it should be published. However, I have a number of suggestions for improvement including a few important issues that need to be addressed.

Major points:

1.1. It is unclear why two different genome assemblies are presented instead of just one most optimal assembly. This is not the way I would have gone about assembling this combination of data but presumably Dovetail scaffolding and gene modelling were performed before PacBio sequencing and scaffolding? Re-doing the assembly would be a more logical way would probably have relatively little improvement but a little more explanation of the rationale or 'historical' reasons for two different assemblies and/or this assembly strategy would be a helpful addition to readers looking in the literature for examples on best practices for genome assembly.

Thank you for this comment. The reviewer is correct that there is some degree of history involved. We initially did the assembly without PacBio, and did the presented analyses on this. Later we were offered the chance to try and improve it with PacBio, which we did, but as you can see there was minimal improvement in the assembly statistics (Table 1 and Table S2), but i) an increase of the total genome size to 3.155 Gb, beyond the expected 2.7 Gb estimated in kmergenie, and ii) a slight decrease in the BUSCO completeness assessment. As such, we elected to retain the results based on the Dovetail assembly, but given that we assume others may wish to use the alternative assembly and explore the differences, we provide both.

1.2. Related to this issue, there is little comparison of the two genome assemblies and it is unclear which assembly was used for what analyses and even Table 1 and Table S2's titles are a bit ambiguous with respect to which assembly statistics are presented. Please explicitly state which assembly was used for which analyses.

In the beginning of the "Data analyses" section, we now clearly state which assembly was used in the comparative genomics analyses (from Line 297) and provide an explanation for that choice. Additionally, we also mention the choice in the Methods section (Lines 183 to 185) before describing the strategies for annotation and comparative analyses.

1.3. The approach used for gene annotation is unconventional and the inferred number of protein-coding gene models is very high. This does not mean the gene model set is bad, but I feel that data needed for the reader to assess the quality of the gene models are lacking. Please run BUSCO on the gene models and report these data as well.

We now also provide the results from BUSCO when using the gene models as input for comparison.

1.4. Specimen collection data are not reported in the manuscript.

This information has now been added to Table S1.

Minor points:

1.5. Scientific names of species need to be italicized throughout.

Done.

1.6. Did all the giant squid DNA come from the same individual?

Yes, this is now clear in Line 172.

1.7. Lines 140-141: "currently increasing locally" is a bit awkward and vague.

Replaced by "in some regions".

1.8. Line 176: Which reads? All Illumina reads? PE reads only?

This has now been clarified on Line 176.

1.9. Line 185: Again, this seems to me to be a strange assembly strategy and I think that it should be clearly stated that PacBio data became available 'late in the game' if that is the case. Otherwise, the logic behind this assembly strategy needs to be explained.

In the beginning of the "Data analyses" section, we now clearly state which assembly was used in the comparative genomics analyses (from Line 297) and provide an explanation for that choice.

1.10. Line 199: High-throughput is misspelled.

Done.

1.11. Line 203: Clarify what is meant by reference transcriptome. All reads from all tissues were pooled and assembled together?

This has now been clarified in Lines 203-204.

1.12. Line 205: "EvidencialGene" is a typo.

Corrected.

1.13. Lines 261-262: Please provide details on exactly what was done in this study in the supplementary material. Description of how the final gene models were selected is vague.

We now further discuss the filters applied in lines 272-275. The total number of protein-coding genes passing all the filters is 33,406.

1.14. Line 277: What is meant by a "bespoke pipeline"? Custom scripts should be made available.

No custom analysis scripts were developed. We simply use 'bespoke' to mean 'tailored to our particular purpose'. Here this refers an analysis pipeline combining: a preliminary analysis using RepeatMasker, followed by a de novo analysis using RepeatModeler and a referenced and publicly available script by Platt et al, followed by a full annotation using RepeatMasker. These steps are fully outlined and referenced in the methods section. We have simplified the sentence which now reads: "Repetitive elements were first identified using RepeatMasker v.4.0.8"

1.15. Line 450: Correct "Sampling was following"

Done.

1.16. BUSCO results are presented in the methods section (should be in the results by the way) for the pre-PacBio scaffolding genome but not the post-PacBio scaffolding

genome.

The results of BUSCO for post-PacBio step are presented in Table S2 (as indicated in Line 186). We moved the description of the BUSCO results to the "Data analyses" section and added a clarification regarding the choice of the assembly for the overall comparative genomics analyses (from Line 297).

1.17. Table 1: BUSCO should be in all capital letters.

Done.

1.18. Figure 3: What does the note "Gene size only" mean?

This gene was reported to be fully isolated from other Hox genes in a different scaffold but was not alone in the scaffold. There were other non-Hox genes. Figure 3 aims to show both the organisation and the range occupied by Hox genes. Considering the organisation, the gene is isolated such as in *O. bimaculoides*. Regarding the size, the schematic representation indicates only the Hox "cluster" area. In *O. bimaculoides*, the scaffolds contain only the Hox genes. This means it could be possible for the cluster to be there but only when considering a very vast distance. In this scenario for *C. teleta*, the gene is found in the middle of the scaffold, surrounded by other genes. It is not part of the cluster. Indicating the full scaffold size could lead to a wrong interpretation of the gene size and of the Hox gene range. As such, only the gene size is indicated.

1.19. Table S1: Please provide total number of reads and somewhere it should be clarified how many different instrument runs were conducted and if different libraries were multiplexed on the Illumina platform.

This information has now been added to Table S1.

Reviewer #2: The authors present the genome of the giant squid *Architeuthis dux*. Several cephalopod genomes have been sequenced, but our genomic understanding of cephalopods living in the deep-sea environment is still poor. The authors sequenced a giant squid species *A. dux* together with several transcriptomes from the gonad, liver and brain tissues derived from three other squid species including *Onychoteuthis banksii*, *Dosidicus gigas*, and *Sthenoteuthis oualaniensis*.

Having a giant squid genome is an important contribution to the field of cephalopod genomics, especially for further meaningful comparative genomics. The authors provide a decent genome assembly. And the observation of a non-tightly physically linked Hox cluster is interesting. The manuscript is well written in general, however, there are a lot of editing errors throughout the whole manuscript, which distracts the reading. The authors need to carefully fix all these typos and errors during the revision. Further comments are provided below.

Major comments:

2.1. In the Abstract/Findings, there is a lot of information about "Methods" (e.g. how many raw reads, sequencing of proteome and RNA) instead of what the authors found from the genome itself. Also, the statement "RNA from three different tissue types from three other species of squid to assist genome annotation." is very vague. What tissue types from what species should be clearly described. The authors need to rewrite this section.

In the abstract we followed the format that is usual in a data note, providing detailed information on the data provided by this work. We have now added the names of the three species of squid to the abstract.

2.2. Line 153: Body patterning system? Usage of body patterning is confusing here since body patterning often refers to the developmental process during embryogenesis but not the skin color pattern.

We have rephrased the sentence to: "Cephalopods can rapidly alter the texture,

pattern, colour and brightness of their skin, and this both enables a complex communication system, as well as provides exceptional camouflage and mimicry.”

2.3. The authors cited that there is a global proliferation of cephalopods (Lines 140 and 141) but later cited other studies saying that there is a regional extinction. It is a bit confusing whether cephalopods are undergoing proliferation or extinction. Given that the earlier citation is more recent (Doubleday et al., 2016) than others, it is wondering which condition is closer to the current situation.

We have removed the second statement to avoid confusion.

2.4. Although it is agreeable in general to have genome resources from unexplored species, the authors' argument in the last paragraph of Data description/Context is not convincing. The link between having a genome and aiding conservation efforts as well as ensuring continued existence is not clear.

Without a genome, population genomic studies that provide information regarding the genetic diversity and structure of populations becomes very challenging, with genome-wide data having to be produced from reduced-representation methods that have many biases. In this last paragraph, we state this specifically: “A genome is an important resource for future population genomics studies[...]”.

2.5. Do the authors have any idea why the genome contains so many protein-coding genes (51,225 genes predicted) in comparing to other cephalopod species usually having only 20,000-30,000 genes? For example, is it due to that *A. dux* has more lineage-specific genes or expansions of certain gene families?

We have revised our gene models and now further discuss the filters applied in lines 272-275. The total number of protein-coding genes passing all the filters is 33,406.

2.6. Given that genome size and polyploidy of the organisms are often correlated to increased body size (Session et al., 2016), have the authors checked if there is whole-genome duplication or polyploidy in the *A. dux* genome? Session et al. (2016) Genome evolution in the allotetraploid frog *Xenopus laevis*. *Nature* 538, 336-343.

We did confirm that the genome was not polyploid by testing for Hardy–Weinberg equilibrium using re-sequencing data from 32 giant squid individuals (Winkelman et al, unpublished results) and there is no evidence for an ancient duplication since we only found one intact Hox complement.

2.7. Figure 3: The authors should provide scaffold numbers for the Hox clusters from each species. Also, in most cases, Hox genes in the Hox cluster are adjacent to each other without the insertion of other non-Hox genes. If there is a special case in *A. dux* and *E. scolopes*, the authors should show the real gene arrangement on that scaffold, especially for the non-Hox genes (with brief annotation) that are in between Hox genes. This can be achieved by having an additional panel in the same figure. The authors are encouraged to show an illustration on the types of Hox gene organization in order to give the readers a better understanding of this context.

Figure 3 has received new panels. Scaffold information for *A. dux* was added in panel C (Figure 3-C). As the assemblies of the other species were retrieved from other studies, the readers are directed to the appropriate references for further detail. An extra panel depicting the Hox cluster organisation in more detail has been added. *E. scolopes* data is shown as reported in its published study. No non-Hox genes were indicated for the area covered in this representation. An additional panel with a simplified version of the various Hox "cluster" types was inserted in panel A (Figure 3-A).

Minor comments:

2.1.1. Line 149: ~2cm -> "~2 cm"  
Done.

- 2.1.2. Line 150: 3 orders -> "three orders"  
Done.
- 2.1.3. Line 150: Architeuthis dux -> "A. dux"  
Done.
- 2.1.4. Lines 150 and 151: 10-12cm... 20m -> "10-12 cm... 20 m"  
Done.
- 2.1.5. Line 152: 500kg -> "500 kg"  
Done.
- 2.1.6. Line 171: a Architeuthis dux sample -> "an A. dux sample"  
Done.
- 2.1.7. Line 172: What is CTAB?  
CTAB = "cetyl trimethylammonium bromide"; this description has been included in the text (Line 172)
- 2.1.8. Line 184: For Eukaryota and Metazoa we identified... -> "For Eukaryota and Metazoa, we identified..."  
Done.
- 2.1.9. Line 184: ... 90.4 % and 92.1 %... -> "... 90.4% and 92.1%..."  
Done.
- 2.1.10. Line 185: 23.38Gb -> "23.38 Gb"  
Done.
- 2.1.11. Line 186: 14.79kb -> "14.79 kb"  
  
Done.
- 2.1.12. "k-mer" (Line 204) or "kmer" (Line 176) to be consistent.  
Chose to use "kmer".
- 2.1.13. Line 216: 100,000 g -> "100,000×g"  
Done.
- 2.1.14. Lines 219 and 222: SDS-PAGE -> "SDS-PAGE" (hyphen but not en dash)  
Done.
- 2.1.15. Line 221: Tris - HCl -> Tris-HCl (single hyphen but not en dash with spaces)  
Done.
- 2.1.16. Line 226: LC-MS/MS analyses -> "LC-MS/MS analyses" (hyphen but not en dash)  
Done.
- 2.1.17. Line 254: Using italic for scientific names (i.e. Octopus bimaculatus, Crassostrea gigas, and Lottia gigantea)  
Done.
- 2.1.18. Line 260: ... 200kb (total length 199Mb)... -> "... 200 kb (total length 199 Mb)..."  
Done.
- 2.1.19. Line 290: Transposable elements -> "transposable elements"  
Done.
- 2.1.20. Line 300: Architeuthis dux -> "A. dux"  
Done.
- 2.1.21. Line 323: ~5-8% -> "~5–8%" (en dash but not hyphen for a range)



|  |                                                                                                                                                                                                                                                                                                                                                                                                                                                                                                                                                                                                                                                                                                                                                                                                                                                                                                                                                                                                                                                                                                                                                                                                                                                                                                                                                        |
|--|--------------------------------------------------------------------------------------------------------------------------------------------------------------------------------------------------------------------------------------------------------------------------------------------------------------------------------------------------------------------------------------------------------------------------------------------------------------------------------------------------------------------------------------------------------------------------------------------------------------------------------------------------------------------------------------------------------------------------------------------------------------------------------------------------------------------------------------------------------------------------------------------------------------------------------------------------------------------------------------------------------------------------------------------------------------------------------------------------------------------------------------------------------------------------------------------------------------------------------------------------------------------------------------------------------------------------------------------------------|
|  | <p>Done.</p> <p>2.1.22. Line 381: Octopus bimaculoides -&gt; "O. bimaculoides"<br/>Done.</p> <p>2.1.23. Line 383: Euprymna scolopes -&gt; "E. scolopes" (in italic)<br/>Done.</p> <p>2.1.24. Line 395: Euprymna scolopes -&gt; "E. scolopes"<br/>Done.</p> <p>2.1.25. Lines 397 &amp; 398: 500 - 10,000 kb -&gt; "500-10,000 kb" (en dash but not hyphen for a range)<br/>Done.</p> <p>2.1.26. Line 406: ... observed in Hox 1, Hox 4, ANTP, Lox 2, Lox 5, Post 1 and Post 2. Hox 1 did,... -&gt; "... observed in Hox1, Hox4, ANTP, Lox2, Lox5, Post1 and Post2. Hox1 did,..."<br/>Done.</p> <p>2.1.27. Line 407: Hox 1 -&gt; "Hox1"<br/>Done.</p> <p>2.1.28. Line 408: Hox 3 -&gt; "Hox3"<br/>Done.</p> <p>2.1.29. Line 409: Lox 4 -&gt; "Lox4"<br/>Done.</p> <p>2.1.30. Lines 410, 412 &amp; 413: Hox 2 -&gt; "Hox2"<br/>Done.</p> <p>2.1.31. Line 421: ... contains 7 reflectin genes and 3 reflectin-like genes... -&gt; "... contains seven reflectin genes and three reflectin-like genes..."<br/>Done.</p> <p>2.1.32. Line 422: ... exception of 1 reflectin gene, ... -&gt; "... exception of one reflectin gene, ..."<br/>Done.</p> <p>2.1.33. Line 436: ... (tsa)... -&gt; "... (TSA)..."<br/>Done.</p> <p>2.1.34. Lines 647 &amp; 657: Architeuthis dux -&gt; "A. dux"<br/>Done.</p> <p>2.1.35. Line 659: Hox 2 -&gt; "Hox2"<br/>Done.</p> |
|--|--------------------------------------------------------------------------------------------------------------------------------------------------------------------------------------------------------------------------------------------------------------------------------------------------------------------------------------------------------------------------------------------------------------------------------------------------------------------------------------------------------------------------------------------------------------------------------------------------------------------------------------------------------------------------------------------------------------------------------------------------------------------------------------------------------------------------------------------------------------------------------------------------------------------------------------------------------------------------------------------------------------------------------------------------------------------------------------------------------------------------------------------------------------------------------------------------------------------------------------------------------------------------------------------------------------------------------------------------------|

**Additional Information:**

| Question                                                                                                                                                                                                                          | Response |
|-----------------------------------------------------------------------------------------------------------------------------------------------------------------------------------------------------------------------------------|----------|
| Are you submitting this manuscript to a special series or article collection?                                                                                                                                                     | No       |
| <b>Experimental design and statistics</b>                                                                                                                                                                                         | Yes      |
| Full details of the experimental design and statistical methods used should be given in the Methods section, as detailed in our <a href="#">Minimum Standards Reporting Checklist</a> . Information essential to interpreting the |          |

|                                                                                                                                                                                                                                                                                                                                                                                                                                                                                                                                                         |            |
|---------------------------------------------------------------------------------------------------------------------------------------------------------------------------------------------------------------------------------------------------------------------------------------------------------------------------------------------------------------------------------------------------------------------------------------------------------------------------------------------------------------------------------------------------------|------------|
| <p>data presented should be made available in the figure legends.</p> <p>Have you included all the information requested in your manuscript?</p>                                                                                                                                                                                                                                                                                                                                                                                                        |            |
| <p><b>Resources</b></p> <p>A description of all resources used, including antibodies, cell lines, animals and software tools, with enough information to allow them to be uniquely identified, should be included in the Methods section. Authors are strongly encouraged to cite <a href="#">Research Resource Identifiers</a> (RRIDs) for antibodies, model organisms and tools, where possible.</p> <p>Have you included the information requested as detailed in our <a href="#">Minimum Standards Reporting Checklist</a>?</p>                     | <p>Yes</p> |
| <p><b>Availability of data and materials</b></p> <p>All datasets and code on which the conclusions of the paper rely must be either included in your submission or deposited in <a href="#">publicly available repositories</a> (where available and ethically appropriate), referencing such data using a unique identifier in the references and in the “Availability of Data and Materials” section of your manuscript.</p> <p>Have you have met the above requirement as detailed in our <a href="#">Minimum Standards Reporting Checklist</a>?</p> | <p>Yes</p> |

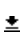

[Click here to view linked References](#)

1 A draft genome sequence of the elusive giant squid, *Architeuthis dux*

2

3 Rute R. da Fonseca<sup>\*1,2</sup>, Alvarina Couto<sup>3</sup>, Andre Machado<sup>4</sup>, Brona Brejova<sup>5</sup>, Carolin B. Albertin<sup>6</sup>, Filipe

4 Silva<sup>4</sup>, Paul Gardner<sup>7</sup>, Toby Baril<sup>8</sup>, Alex Hayward<sup>8</sup>, Alexandre Campos<sup>4</sup>, Ângela Ribeiro<sup>4</sup>, Inigo Barrio

5 Hernandez<sup>9</sup>, Henk-Jan Hoving<sup>10</sup>, Ricardo Tafur-Jimenez<sup>11</sup>, Chong Chu<sup>12</sup>, Barbara Frazão<sup>4,13</sup>, Bent

6 Petersen<sup>14,15</sup>, Fernando Peñaloza<sup>16</sup>, Francesco Musacchia<sup>17</sup>, Graham C. Alexander Jr.<sup>18</sup>, Hugo

7 Osório<sup>19,20,21</sup>, Inger Winkelmann<sup>22</sup>, Oleg Simakov<sup>23</sup>, Simon Rasmussen<sup>24</sup>, M. Ziaur Rahman<sup>25</sup>, Davide

8 Pisani<sup>26</sup>, Jakob Vinther<sup>27</sup>, Erich Jarvis<sup>28</sup>, Guojie Zhang<sup>30,31,32,33</sup>, Jan Strugnell<sup>34</sup>, L. Filipe C. Castro<sup>4,36</sup>, Olivier

9 Fedrigo<sup>28</sup>, Mateus Patricio<sup>29</sup>, Qiye Li<sup>37</sup>, Sara Rocha<sup>3</sup>, Agostinho Antunes<sup>4,36</sup>, Yufeng Wu<sup>38</sup>, Bin Ma<sup>39</sup>, Remo

10 Sanges<sup>40,41</sup>, Tomas Vinar<sup>5</sup>, Blagoy Blagoev<sup>9</sup>, Thomas Sicheritz-Ponten<sup>14,15</sup>, Rasmus Nielsen<sup>22,42</sup>, M. Thomas

11 P. Gilbert<sup>22,43</sup>

12

13 <sup>1</sup>Center for Macroecology, Evolution and Climate, Natural History Museum of Denmark, University of

14 Copenhagen, Copenhagen, Denmark.

15 <sup>2</sup>The Bioinformatics Centre, Department of Biology, University of Copenhagen, Copenhagen, Denmark.

16 <sup>3</sup>Department of Biochemistry, Genetics and Immunology, University of Vigo, Vigo, Spain.

17 <sup>4</sup>CIIMAR, Interdisciplinary Centre of Marine and Environmental Research, University of Porto, Porto,

18 Portugal.

19 <sup>5</sup>Faculty of Mathematics, Physics and Informatics, Comenius University in Bratislava, Bratislava, Slovak

20 Republic.

21 <sup>6</sup>Department of Organismal Biology and Anatomy, University of Chicago, Chicago, USA.

22 <sup>7</sup>Department of Biochemistry, University of Otago, New Zealand.

23 <sup>8</sup>Centre for Ecology and Conservation, University of Exeter, Penryn Campus, Cornwall, UK.

24 <sup>9</sup>Department of Biochemistry and Molecular Biology, University of Southern Denmark, Odense,  
25 Denmark.

26 <sup>10</sup>GEOMAR Helmholtz Centre for Ocean Research Kiel, Kiel, Germany.

27 <sup>11</sup>Instituto del Mar del Perú.

28 <sup>12</sup>Department of Biomedical Informatics, Harvard Medical School, Boston, USA.

29 <sup>13</sup>IPMA, Fitoplâncton Lab, Lisboa, Portugal.

30 <sup>14</sup>Centre of Excellence for Omics-Driven Computational Biodiscovery (COMBio), Faculty of Applied  
31 Sciences, AIMST University, Kedah, Malaysia.

32 <sup>17</sup>Genomic Medicine, Telethon Institute of Genetics and Medicine, Pozzuoli, Naples, Italy

33 <sup>18</sup>GCB Sequencing and Genomic Technologies Shared Resource, Duke University, Durham, NC, USA.

34 <sup>19</sup>i3S-Instituto de Investigação e Inovação em Saúde, Universidade do Porto, Porto, Portugal.

35 <sup>20</sup>IPATIMUP -Institute of Molecular Pathology and Immunology, University of Porto, Porto, Portugal.

36 <sup>21</sup>Faculty of Medicine of the University of Porto, Porto, Portugal.

37 <sup>22</sup>Centre for GeoGenetics, Natural History Museum of Denmark, University of Copenhagen, Copenhagen,  
38 Denmark.

39 <sup>23</sup>Department of Molecular Evolution and Development, University of Vienna, Vienna, Austria.

40 <sup>24</sup>Novo Nordisk Foundation Center for Protein Research, Faculty of Health and Medical Sciences,  
41 University of Copenhagen, Copenhagen, Denmark

42 <sup>25</sup>Bioinformatics Solutions Inc, Waterloo, Ontario, Canada.

43 <sup>26</sup>Departments of Biological sciences and Earth Sciences, University of Bristol, Bristol, UK.

44 <sup>27</sup>Departments of Biological sciences and Earth Sciences, University of Bristol, Bristol, UK.

45 <sup>28</sup>The Rockefeller University, New York, USA.

46 <sup>29</sup>European Molecular Biology Laboratory, European Bioinformatics Institute (EMBL-EBI), Wellcome  
47 Genome Campus, Hinxton, UK.

48 <sup>30</sup>Section for Ecology and Evolution, Department of Biology, University of Copenhagen, Copenhagen,  
49 Denmark.

50 <sup>31</sup>China National Genebank, BGI-Shenzhen, Shenzhen, China.

51 <sup>32</sup>State Key Laboratory of Genetic Resources and Evolution, Kunming Institute of Zoology, Chinese  
52 Academy of Sciences, Kunming, China.

53 <sup>33</sup>CAS Center for Excellence in Animal Evolution and Genetics, Chinese Academy of Sciences, Kunming,  
54 China.

55 <sup>34</sup>Centre for Sustainable Tropical Fisheries & Aquaculture, James Cook University, Townsville,  
56 Queensland, Australia

57 <sup>35</sup>Department of Ecology, Environment and Evolution, School of Life Sciences, La Trobe University,  
58 Melbourne, Victoria, Australia

59 <sup>36</sup>Department of Biology, Faculty of Sciences, University of Porto, Portugal.

60 <sup>37</sup>BGI-Shenzhen, Shenzhen, China

61 <sup>38</sup>Department of Computer Science and Engineering, University of Connecticut, Storrs, USA.

62 <sup>39</sup>School of Computer Science, University of Waterloo, Canada.

63 <sup>40</sup>Area of Neuroscience, Scuola Internazionale Superiore di Studi Avanzati (SISSA), Trieste, Italy.

64 <sup>41</sup>Biology and Evolution of Marine Organisms, Stazione Zoologica Anton Dohrn, Napoli, Italy.

65 <sup>42</sup>Departments of Integrative Biology and Statistics, University of California, Berkeley, U.S.A.

66 <sup>43</sup>Norwegian University of Science and Technology, University Museum, Trondheim, Norway

67

68 Email addresses:

69 Rute R da Fonseca: rfonseca@bio.ku.dk (corresponding author)  
70 Alvarina Couto: alvarinacouto@gmail.com  
71 Andre M.Machado: andre.machado@ciimar.up.pt  
72 Brona Brejova: brejova@fmph.uniba.sk  
73 Caroline B.Albertin: calbertin@mbl.edu

74 Filipe Silva: filipecgilva@gmail.com  
75 Paul Gardner: paul.gardner@otago.ac.nz  
76 Tobias Baril: tb529@exeter.ac.uk  
77 Alex Hayward Hayward: Alex.Hayward@exeter.ac.uk  
78 Alexandre Campos: acampos@ciimar.up.pt  
79 Ângela Ribeiro: ribeiro.angela@gmail.com  
80 Inigo Barrio Hernandez: ibarrioh@ebi.ac.uk  
81 Henk-Jan Hoving: hoving@geomar.de  
82 Ricardo Tafur-Jiménez: rtafur@imarpe.gob.pe  
83 Chong Chu: Chong\_Chu@hms.harvard.edu  
84 Barbara Frazão: bmfrazao@gmail.com  
85 Bent Petersen: bent.petersen@bio.ku.dk  
86 Fernando Peñaloza: fpenaloz@lcg.unam.mx  
87 Francesco Musacchia: f.musacchia@tigem.it  
88 Graham C. Alexander Jr.: gca2@duke.edu  
89 Hugo Osório: hosorio@ipatimup.pt  
90 Inger E. Winkelmann: inger.winkelmann@gmail.com  
91 Oleg Simakov: oleg.simakov@univie.ac.at  
92 Simon Rasmussen: simon.rasmussen@cpr.ku.dk  
93 M. Ziaur Rahman: zrahman@bioinfor.com  
94 Davide Pisani: Davide.Pisani@bristol.ac.uk  
95 Erich D. Jarvis: ejarvis@rockefeller.edu  
96 Guojie Zhang: zhanggjconi@gmail.com  
97 Jakob Vinther: vinther.jakob@gmail.com  
98 Jan M. Strugnell: jan.strugnell@jcu.edu.au  
99 L. Filipe C. Castro: filipe.castro@ciimar.up.pt  
100 Olivier Fedrigo: ofedrigo@rockefeller.edu  
101 Mateus Patricio: mateus@ebi.ac.uk  
102 Qiye Li: liqiye@genomics.cn  
103 Sara Rocha: sprocha@gmail.com  
104 Agostinho Antunes: aantunes@ciimar.up.pt  
105 Yufeng Wu: ywu@engr.uconn.edu  
106 Bin Ma: binma@uwaterloo.ca  
107 Remo Sanges: remo.sanges@gmail.com  
108 Tomas Vinar: tomas.vinar@fmph.uniba.sk  
109 Blagoy Blagoev: bab@bmb.sdu.dk  
110 Thomas Sicheritz-Ponten: thomassp@bio.ku.dk  
111 Rasmus Nielsen: rasmus\_nielsen@berkeley.edu  
112 M. Thomas P. Gilbert: tgilbert@snm.ku.dk

## 113 Abstract

### 114 Background

115 The giant squid (*Architeuthis dux*; Steenstrup, 1857) is an enigmatic giant mollusk with a circumglobal  
116 distribution in the deep ocean, except in the high Arctic and Antarctic waters. The elusiveness of the  
117 species makes it difficult to study. Thus, having a genome assembled for this deep-sea dwelling species  
118 will allow unlocking several pending evolutionary questions.

### 119 Findings

120 We present a draft genome assembly that includes 200 Gb of Illumina reads, 4 Gb of Moleculo synthetic  
121 long-reads and 108 Gb of Chicago libraries, with a final size matching the estimated genome size of 2.7  
122 Gb, and a scaffold N50 of 4.8 Mb. We also present an alternative assembly including 27 Gb raw reads  
123 generated using the Pacific Biosciences platform. In addition, we sequenced the proteome of the same  
124 individual and RNA from three different tissue types from three other species of squid species  
125 (*Onychoteuthis banksii*, *Dosidicus gigas*, and *Sthenoteuthis oualaniensis*) to assist genome annotation.  
126 We annotated 33,406 protein coding genes supported by evidence and the genome completeness  
127 estimated by BUSCO reached 92%. Repetitive regions cover 49.17% of the genome.

### 128 Conclusions

129 This annotated draft genome of *A. dux* provides a critical resource to investigate the unique traits of this  
130 species, including its gigantism and key adaptations to deep-sea environments.

### 131 Keywords

132 Cephalopod, invertebrate, genome assembly.

133

## 134 Data description

### 135 Context

136 Cephalopods are the most behaviourally complex of the invertebrate protostomes [1]. Their large, highly  
137 differentiated brains are comparable in relative size and complexity to those of vertebrates [2], as are  
138 their cognitive capabilities [1]. Cephalopods are distributed worldwide from tropical to polar marine  
139 habitats, from benthic to pelagic zones and from intertidal areas down to the abyssal parts of the deep  
140 sea, with the only exception being the Black Sea. Cephalopod populations are thought to be currently  
141 increasing in some regions for a variety of reasons [3], including potential predator release as a  
142 consequence of the depletion of fish stocks [4]. The class Cephalopoda contains approximately 800  
143 species, with the vast majority belonging to the soft-bodied subclass Coleoidea (cuttlefishes, octopuses  
144 and squids), and a small handful belonging to the Nautiloidea (nautilus) [5]. Cephalopods are  
145 ecologically important as a primary food source for marine mammals, birds and for many fish species.  
146 They are also increasingly important as a high-protein food source for humans and are a growing target  
147 for commercial fisheries and farming [6].

148 Cephalopods show a wide variety of morphologies, lifestyles and behaviours [7], but with the exception  
149 of the nautilus they are characterised by having rapid growth and short lifespans, despite a considerable  
150 investment in costly sensory adaptations [2]. They range in size from the tiny pygmy squids (~2 cm) to  
151 animals that are nearly three orders of magnitude larger, such as the giant squid, *A. dux* (average length  
152 10–12 m, and reported up to 20 m total length) [6,8,9], to the colossal squid, *Mesonychoteuthis hamiltoni*  
153 (maximum length remains unclear, but a recorded weight of 500 kg makes it the largest known  
154 invertebrate [10]). Cephalopods can rapidly alter the texture, pattern, colour and brightness of their skin,  
155 and this both enables a complex communication system, as well as provides exceptional camouflage and  
156 mimicry [11]. Together these allow cephalopods to both avoid predators, and hunt prey highly efficiently,  
157 making them some of the top predators in the ocean. The remarkable adaptations of cephalopods also



158 extend to their genome, with recent work demonstrating increased levels of RNA editing to diversify  
159 proteins involved in neural functions [12].  
160 Over recent years, oceanic warming and acidification, pollution, expanding hypoxia and fishing [13–15]  
161 have been shown to affect cephalopod populations. Mercury has been found in high concentrations in  
162 the tissue of giant squid specimens [16], and accumulation of flame retardant chemicals has also been  
163 detected in the tissue of deep-sea cephalopods [17]. Consequently, there is an urgent need for greater  
164 biological understanding of these important, but rarely encountered animals, in order to aid conservation  
165 efforts and ensure their continued existence. A genome is an important resource for future population  
166 genomics studies aiming at characterizing the diversity of the legendary giant squid, the species which has  
167 inspired generations to tell tales of the fabled Kraken.

168

## 169 [Methods](#)

### 170 *DNA extraction, library building, and de novo genome assembly*

171 High-molecular-weight genomic DNA was extracted from a single *A. dux* individual (NCBI taxon id:  
172 256136) using a cetyl trimethylammonium bromide (CTAB) based buffer followed by organic solvent  
173 purification, following Winkelmann et al [18] (details in the Supplementary Information). We generated  
174 116 Gb of raw reads from Illumina short-insert libraries, 76 Gb of paired-end reads from libraries ranging  
175 from 500 bp to 800 bp in insert size, and 5.4 Gb of mate-pair with a 5 kb insert (Table S1). Furthermore,  
176 we generated 3.7 Gb of paired-end reads using Moleculo libraries (3 High-Throughput libraries and 4  
177 High-Fidelity libraries). The kmer distribution of the reads under a diploid model in kmergenie [19]  
178 predicted the genome size to be 2.7 Gb.

179 An initial assembly generated with Meraculous [20] using Illumina and Moleculo data (N50 of 32 Kb,  
180 assembly statistics in Table S2) was used as input for Dovetail Genomic's HiRise scaffolding software  
181 together with the Hi-C data generated from two Chicago libraries corresponding to a physical coverage

182 of the genome of 52.1X. This “Meraculous + Dovetail” assembly (statistics in Table 1) was the one used  
183 for the genome annotation (non-coding RNAs, protein-coding genes and repeats) and comparative  
184 genomics analyses presented in this paper. Further scaffolding was done using 23.38 Gb of PacBio reads  
185 (19 SMRT cells, average read length is 14.79 kb) using the default parameters in PBJelly [21] (see  
186 assembly statistics in Table S2). The genome gene content completeness was evaluated through the  
187 Benchmarking Universal Single-Copy Orthologs (BUSCO v.3.0.2, datasets: Eukaryota, Metazoan) [22].

#### 188 *Transcriptome sequencing and de novo assembly*

189 Given the extreme rarity of live giant squid sightings, we were unable to collect fresh organ samples  
190 (following the recommendations in [23]) containing intact RNA from the species to assist with the  
191 genome annotation. As an alternative, we extracted total RNA from gonad, liver and brain tissue from  
192 live caught specimens of three other oegopsid squid species (*Onychoteuthis banksii*, *Dosidicus gigas*, and  
193 *Sthenoteuthis oualaniensis*; NCBI taxon ids 392296, 346249 and 34553, respectively; Supplementary  
194 Figure S1), using the Qiagen RNeasy extraction kit (Qiagen, CA, USA). The RNA integrity and quantity was  
195 measured on a Qubit fluorometer (Invitrogen, OR, USA) and on the Agilent Bioanalyzer 2100 (Agilent,  
196 CA, USA). The Illumina TruSeq Kit v.2.0 was used to isolate the mRNA and prepare cDNA libraries for  
197 sequencing, following the recommended protocol. Compatible index sequences were assigned to  
198 individual libraries to allow for multiplexing on four lanes of 100bp paired-end technology on an Illumina  
199 HiSeq 2000 flow cell. Sequencing of the cDNA libraries was done at the National High-Throughput  
200 Sequencing Center at the University of Copenhagen in Denmark. We assessed the quality of the raw  
201 reads using FastQC v0.10.0 [24]. After removing indexes and adaptors with CutAdapt [25], we trimmed  
202 the reads with the FASTX-toolkit ([http://hannonlab.cshl.edu/fastx\\_toolkit](http://hannonlab.cshl.edu/fastx_toolkit)) removing bases with a Phred-  
203 scale quality score lower than 25. Reference transcriptomes for each species were built after pooling the  
204 reads from all tissues and using these as input in Trinity [26]. This software was used with the default  
205 settings including a fixed kmer size of 25 as suggested by the authors. Annotation of coding regions was

206 done with the EvidentialGene pipeline [27].

#### 207 *Protein extraction, separation by 1D SDS-PAGE, MALDI-TOF/TOF and Protein Identification*

208 Given the practical impossibility of obtaining RNA from a giant squid specimen, we produced a library of  
209 giant squid peptide sequences to guide the gene annotation process.

210 Proteins were solubilised from a giant squid mantle tissue sample according to the procedure described  
211 by Kleffmann et al. [28] and employing the following buffers: (1) 40 mM Tris-HCl, 5 mM MgCl<sub>2</sub> and 1  
212 mM DTT, pH 8.5; (2) 8 M urea, 20 mM Tris, 5 mM MgCl<sub>2</sub> and 20 mM DTT; (3) 7 M urea, 2 M thiourea, 20  
213 mM Tris, 40 mM DTT, 2% CHAPS (w/v) and 1% Triton X-100 (v/v) and (4) 40 mM Tris, 4% SDS (w/v)  
214 and 40 mM DTT. All buffers were augmented with protease inhibitors (Halt™ Protease Inhibitor Cocktail,  
215 EDTA-Free, Thermo Scientific). Tissue samples were ground in liquid nitrogen before homogenization, or  
216 homogenized directly with ultrasound (probe sonication at 60 Hz, for 3 min) in buffer 1. Solubilised  
217 proteins were collected by ultracentrifugation at 100,000xg and 4 °C. Each extraction was performed in  
218 duplicate for each specific buffer and extracts were pooled. Protein extracts were subsequently stored  
219 at -20 °C. Total protein content was estimated according to the Bradford (1976) method [29].

220 Protein separation by 1D SDS-PAGE electrophoresis was carried out as described in Santos et al. [30]. 53  
221 µL of sample (39 µg protein) was diluted in 72 µL of Loading Buffer (0.01% bromophenol blue, 2% SDS  
222 (Sodium-DodecylSulfate), 20% glycerol, 5% β-mercaptoethanol (w/v/v) in 62.5 mM Tris-HCl, pH 6.8). The  
223 resulting solution was heated for 3 min at 99°C. Proteins were separated by SDS-PAGE with 12% (w/v)  
224 polyacrylamide gels. Electrophoresis was carried out using the mini Protean Cell (BioRad) at a constant  
225 voltage of 150 V. The separated proteins were visualized by staining with Colloidal Coomassie Brilliant  
226 Blue (CCB) [31], and lanes were cut into 15 gel sections for subsequent LC-MS/MS analysis.

#### 227 *LC-MS/MS analyses*

228 All samples were analysed with the Easy-nLC system (Thermo Fisher Scientific), connected online to a Q  
229 Exactive mass spectrometer (Thermo Fisher Scientific) equipped with a nanoelectrospray ion source

230 (Thermo Fisher Scientific). Tryptic peptides were loaded in a fused silica column (75  $\mu\text{m}$  inner diameter)  
231 packed with C18 resin (3- $\mu\text{m}$  beads, Reprosil, Dr. Maisch), with solvent A (0.5% acetic acid). They were  
232 then eluted with a 120 minute gradient of solvent B (80% ACN, 0.5% acetic acid) with a constant flow of  
233 250 nL/min. The Q exactive was operated in positive mode with a capillary temperature of 250  $^{\circ}\text{C}$ , using  
234 the data dependent acquisition method, which switches from full MS scans to MS/MS scans for the 12  
235 most intense ions. Fragmentation was achieved by higher-energy collisional dissociation (HCD) with a  
236 normalized collisional energy (NCE) of 25. Full MS ranged from 300 to 1750 m/z at a resolution of  
237 70,000, an Automatic Gain Control (AGC) of  $1\text{e}6$  and a maximum injection time of 120 ms, whereas  
238 MS/MS events were scanned at a resolution of 35,000, an AGC of  $1\text{e}5$ , maximum injection time of 124  
239 ms, isolation windows of 2 m/z and an exclusion window of 45 seconds.

#### 240 *de novo peptide prediction*

241 Raw LC-MS/MS data were read using Thermo Fisher MSRawFileReader 2.2 library and imported into  
242 PEAKS Studio 7.0 and subsequently preprocessed for precursor mass and charge correction, MS/MS de-  
243 isotoping, and deconvolution. PEAKS de novo sequencing [31] was performed on each refined MS/MS  
244 spectrum with a precursor and fragment ion error tolerance of 7 ppm and 0.02 da respectively.  
245 Carbamidomethylation (Cys) was set as a fixed modification and oxidation (Met) and N-terminal  
246 Acetylation as variable modifications. At most, five variable modifications per peptide were allowed. For  
247 each tandem spectrum, five *de novo* candidates were reported along with their Local Confidence Scores  
248 (the likelihood of each amino acid assignment in a *de novo* candidate peptide). This score was used to  
249 determine the accuracy of the *de novo* peptide sequences. The top *de novo* peptide for each spectrum  
250 was determined by the highest Average Local Confidence score (ALC) among the candidates for that  
251 spectrum.

#### 252 *Genome annotation*

253 Protein-coding genes were predicted by ExonHunter [32], which combines probabilistic models of  
254 sequence features with external evidence from alignments. As external evidence, we have used known

255 proteins from *Octopus bimaculatus*, *Crassostrea gigas* (Pacific oyster) and *Lottia gigantea* (Giant owl  
256 limpet) and the predicted proteins encoded by the transcriptomes of the three other oegopsid species  
257 analysed in this paper (*O. banksii*, *D. gigas*, and *S. oualaniensis*). These proteins were aligned to the  
258 genome by BLASTX. De-novo identified MS/MS-based peptides were initially also considered as external  
259 evidence, but were later omitted due to low coverage. Evidence from predicted repeat locations was  
260 used to discourage the model to predict genes overlapping repeats. Since no sufficiently close annotated  
261 genome was available for training gene finding parameters, ExonHunter was first run using *Drosophila*  
262 *melanogaster* parameters on a randomly chosen subset of 118 scaffolds longer than 200kb (total length  
263 199 Mb). Out of 12,912 exons predicted in this run, 5,716 were supported by protein alignment data  
264 and selected to train the parameters of the gene finding model for *A. dux*, using the methods described  
265 in [32]. Rerunning ExonHunter with the resulting *A. dux* model parameters on the entire genome  
266 yielded 51,225 gene predictions genes. Gene prediction in *A. dux* is challenging due to the fragmentary  
267 nature of the genome assembly (60% of predictions span a sequencing gap). This results in a significant  
268 number of artifacts, for example short genes with long introns spanning gaps in the assembly. 18,054  
269 predictions yield protein product shorter than 100 amino acids, yet the median span of these  
270 predictions is more than 4kb and only 32% of them are supported by transcript or protein alignments. In  
271 contrast, 83% of genes with product longer than 100aa are supported. In most of the analyses below,  
272 we consider only 33,406 genes that were found to have transcript evidence (blastp match to a sequence  
273 from a cephalopod transcriptome, with at least 50% of the giant squid coding region covered) and/or  
274 matches in Swissprot or UniRef90 databases (Table 1). This supported set contains much fewer  
275 extremely short genes (Figure S4).

276 The function of the protein-coding genes was inferred with Annocript 0.2 [33], which is based on the  
277 results from blastp [34] runs against the SwissProt (SP) and UniRef90 (Uf). In addition, we performed a

278 rpsblast search using matrices from the conserved domain database (CDD) to annotate specific domains  
279 present on the protein queries.

280 Non-coding RNAs were annotated using the cmsearch program from INFERNAL 1.1 and the covariance  
281 models (CMs) from the Rfam database v12.0 [35,36]. All matches above the curated GA threshold were  
282 included. INFERNAL was selected because it implements the CMs that provide the most accurate  
283 bioinformatic annotation tool for ncRNAs available [37]. tRNA-scan v.1.3.1 was subsequently used to  
284 refine the annotation of tRNA genes (Table S3). The method uses a number of heuristics to increase the  
285 search-speed, annotates the Isoacceptor Type of each prediction, infers if predictions are likely to be  
286 functional or tRNA-derived pseudogenes [38,39]. This method uses CMs to identify tRNAs. Rfam  
287 matches and the tRNA-scan results for families belonging to the same clan were then “competed”, so  
288 that only the best match was retained for any genomic region [36].

#### 289 *Transposable element annotation*

290 Repetitive elements were first identified using RepeatMasker v.4.0.8 [40] with the eukaryota RepBase  
291 [41] repeat library. Low-complexity repeats were ignored (-nolow) and a sensitive (-s) search was  
292 performed. Following this, a de novo repeat library was constructed using RepeatModeler v.1.0.11 [42] ,  
293 including RECON v.1.08 [43] and RepeatScout v.1.0.5 [44]. Novel repeats identified by RepeatModeler  
294 were analyzed with a ‘BLAST, Extract, Extend’ process to characterise elements along their entire length  
295 [45]. Consensus sequences and classification information for each repeat family were generated. The  
296 resulting de novo repeat library was utilized to identify repetitive elements using RepeatMasker.

297 *Data analyses*

298 We present a main draft genome assembly produced using 200 Gb of Illumina reads, 4 Gb of Molecu-  
299 lator synthetic long-reads and 108 Gb of Chicago libraries, with a final size matching the estimated genome  
300 size of 2.7 Gb, and a scaffold N50 of 4.8 Mb (assembly and annotation statistics in Table 1). Genome  
301 completeness estimated by BUSCO reached 90.4% (Eukaryota) and 92.1% (Metazoa), and the  
302 completeness for the 33,406 protein-coding genes was 91.2% (Eukaryota) and 84.0 (Metazoa).  
303 We also produced an alternative assembly including 27 Gb raw reads generated using the Pacific  
304 Biosciences platform, but this showed minimal improvement in assembly statistics, genome size larger  
305 than the predicted and lower BUSCO completeness (Table S2).

306 *Comparative analyses of transposable elements*

307 We estimated the total repeat content of the giant squid genome to be approximately half its total size  
308 (~49.1%) (Figure 1, Supplementary Table S4). Out of all the repeats present in the giant squid genome,  
309 only a few were predicted to be small RNAs, satellites, simple or low complexity repeats (~0.89% of the  
310 total genome), with the vast majority (~48.21%) instead consisting of transposable elements (TEs; i.e.  
311 SINEs, LINEs, LTR retrotransposons, and DNA transposons; Figure 1, Supplementary Table S4). Of the TE  
312 portion of the giant squid genome, the main contribution from annotated TEs is from DNA elements  
313 (11.06%) and LINEs (6.96%), with only a small contribution from SINEs (1.99%) and LTR elements  
314 (0.72%). TEs are a nearly universal feature of eukaryotic genomes, often comprising a large proportion  
315 of the total genomic DNA (e.g. the maize genome is ~85% TEs [46], stick insect genome is ~52% TEs [47],  
316 and the human genome is >45% TEs [48]), consequently these account for the majority of observed  
317 genome size variation among animals.

318 In Figure 1, we summarise the recently reported TE analyses performed on assembled cephalopod  
319 genomes, as follows: California two-spot octopus (*Octopus bimaculatus*) [11] and long-arm octopus (*O.*  
320 *minor*) [49], Hawaiian bobtail squid (*Euprymna scolopes*) [50], and giant squid (*A. dux*). The varying  
321 sequencing strategies employed to generate currently available cephalopod genomes (and

322 accompanying variation in assembly quality) complicates the comparative analysis of TE content for this  
323 group. However, notwithstanding this caveat, it does seem clear that TEs make up a large fraction of the  
324 total genomic content across all cephalopod genomes published to date (Figure 1). DNA transposons  
325 and LINEs dominate in available cephalopod genomes, while LTR elements and SINEs generally  
326 represent a minor portion of cephalopod TEs (Figure 1). Within decapod cephalopods (i.e. squid and  
327 cuttlefish), patterns in TE content are generally similar, however, the giant squid has a notably larger  
328 proportion of DNA transposons (1,626,482 elements, 11.06% of the total genome) than the Hawaiian  
329 bobtail squid (855,308 elements, 4.05% of the total genome), with the bobtail squid in turn having a  
330 similar proportion of LINEs (752,629 elements, 6.83% of the total genome) than the giant squid (766,382  
331 elements, 6.96% of the total genome; Figure 1).

332 The defining ability of TEs to mobilise, in other words, to transfer copies of themselves into other parts  
333 of the genome, can result in harmful mutations. However, TEs can also facilitate the generation of  
334 genomic novelty, and there is increasing evidence of their importance for the evolution of host-adaptive  
335 processes [51]. In the giant squid genome, all classes of TEs were more frequent (~38.23) in intergenic  
336 regions (here defined as regions >2kb upstream or downstream of an annotated gene), than in genic  
337 regions versus % of the genome in intergenic regions (~16.6%; Figure 2A). These findings are broadly  
338 similar to those reported for other cephalopods, although a larger proportion of the giant squid genome  
339 is composed of repeats located within genic regions (percentage of the genome represented by TEs for  
340 *O. bimaculoides*: ~6% genic versus ~30% intergenic, and for *O. minor* ~6% genic versus ~40% intergenic  
341 [49]).

342 A Kimura distance-based copy divergence analysis revealed that the most frequent TE sequence  
343 divergence relative to the TE consensus sequence in the giant squid genome was ~5–8% across all  
344 repeat classes, suggesting a relatively recent transposition burst across all major TE types (Figure 2B).  
345 Divergence peaks were most pronounced in LINE RTE elements, Tc/Mar and hAT DNA transposons, and



346 unclassified TEs, with smaller divergence peaks in SINE tRNA elements and Penelope LINE elements  
347 (Figure 2B). Divergence peaks were most pronounced in LINE RTE elements, Tc/Mar and hAT DNA  
348 transposons, and unclassified TEs, with smaller divergence peaks in SINE tRNA elements and Penelope  
349 LINE elements (Figure 2B). In comparison to observations from other cephalopods, these results suggest  
350 a shorter and more intense burst of recent TE activity in the giant squid genome. Overall, further  
351 genomic sampling within each of the cephalopod clades will be needed to understand TE evolution, as  
352 closely related species can show significant differences (*e.g.*, *O. bimaculoides* to *O. vulgaris*) [52].

### 353 *Non-coding RNAs*

354 We identified 50,598 ncRNA associated loci in the squid sequencing data, using curated homology-based  
355 probabilistic models from the Rfam database[53] and the specialized tRNAscan-SE transfer RNA  
356 annotation tool [38]. The essential and well conserved Metazoan ncRNAs: tRNAs, rRNAs (5S, 5.8S, SSU  
357 and LSU), RNase P, RNase MRP, SRP and the major spliceosomal snRNAs (U1, U2, U4, U5, U6), as well as  
358 the minor spliceosomal snRNAs (U11, U12, U4atac & U6atac), are all found in the *A. dux* genome. Some  
359 of the copy numbers associated with the core ncRNAs are extreme. For example, we identified: i)  
360 approximately 24,000 loci that appear to derive from 5S rRNA; ii) approximately 17,000 loci that are  
361 predicted to be tRNA derived; iii) approximately 3,200 Valine tRNAs isotypes and approximately 1,300  
362 U2 spliceosomal RNAs. The microRNA mir-598 also exhibits high copy-numbers at 172. Many of these  
363 are likely to be SINEs derived by transposition. All 20 tRNA isotypes were identified in *A. dux* genome.  
364 Again, many of these had relatively large copy numbers (summarised in Table 1). These ranged from 46  
365 (Cys) up to 2,541 (Val). We identified 174 loci that share homology with 34 known snoRNA families,  
366 these included 15 scaRNA, 41 H/ACA box and 118 C/D box snoRNA associated loci [10]. The snoRNAs are  
367 predominantly involved in rRNA maturation. We identified 7,049 loci that share homology with 283  
368 families of microRNA. Some of these may be of limited reliability, as CMs for simple hairpin structures  
369 can also match other, non-homologous, hairpin-like structures in the genome *e.g.* inverted repeats. A

370 number of cis-regulatory elements were also identified. These included 235 hammerhead 1 ribozymes,  
371 133 Histone 30 UTR stem-loops, and 14 Potassium channel RNA editing signal sequences. There are very  
372 few matches to obvious non-metazoan RNA families in the current assemblies. The only notable  
373 exceptions are babIM, IMES-2, PhotoRC-II and rspL. Each of these families are also found in marine  
374 metagenomic datasets, possibly explaining their presence as “contamination” from the environment.

375

### 376 *Analyses of specific gene families*

377 Several gene families involved in development, such as transcription factors or signaling ligands, are  
378 highly conserved across metazoans and may therefore reveal signatures of genomic events, such as a  
379 whole genome duplication.

380 WNT is a family of secreted lipid-modified signaling glycoproteins with a key role during development  
381 [54]. Comparative analysis of molluscan genomes indicates that the ancestral state was 12 *WNT* genes,  
382 as *Wnt3* is absent in all protostomes examined thus far [55]. The giant squid has the typical 12  
383 lophotrochozoan WNTs (1, 2, 4, A, 5, 6, 7, 8, 9, 10, 11 and 16; Supplementary Figure S2), and therefore  
384 has retained the ancestral molluscan complement, including *Wnt8*, which is absent, for instance, in the  
385 genome of the slipper snail *Lottia gigantea* [56].

386 Protocadherins are a family of cell adhesion molecules that appear to play an important role in  
387 vertebrate brain development [57]. It is thought that they act as multimers at the cell surface in a  
388 manner akin to DSCAM in flies, which lack protocadherins [58]. Cephalopods have massively expanded  
389 this family, with 168 identified in the *O. bimaculoides* genome, whereas only 17-25 protocadherins have  
390 been identified in the genomes of annelids and non-cephalopod molluscs [11]. We identified  
391 approximately 135 protocadherin genes in *A. dux*, many of which are located in clusters in the genome.  
392 The possibility that this gene family plays a developmental role parallel to that of protocadherins in  
393 vertebrate neurodevelopment thus remains a compelling hypothesis.

394 Development organisation of the highly diverse body plans found in the Metazoa is controlled by a  
395 conserved cluster of homeotic genes, which includes, among others, the Hox genes. These are  
396 characterized by a DNA sequence referred to as the homeobox, comprising 180 nucleotides that encode  
397 the homeodomain [59]. Hox genes are usually found in tight physical clusters in the genome and are  
398 sequentially expressed in the same chronological order as they are physically located in the DNA  
399 (temporal and spatial collinearity) [60]. Different combinations of Hox gene expression in the same  
400 tissue type can lead to a wide variety of different structures [61]. This makes the Hox genes a key subject  
401 for understanding the origins of the multitude of forms found in the cephalopods. In *O. bimaculoides*  
402 genome assembly no scaffold contained more than a single Hox gene, meaning that they are fully  
403 atomised [11]. However, in *E. scolopes*, the Hox cluster was found spanning two scaffolds [50]. In the  
404 giant squid, we recovered a full Hox gene cluster in a single scaffold (Figure 3-B). The Hox gene  
405 organization found in the giant squid genome suggests either the presence of a disorganised cluster, so-  
406 called type D, or atomised clusters, type A [61], or possibly a combination of the two (the genes are still  
407 organized, but physically distant from each other). The existence of a "true" cluster seems unlikely, given  
408 the presence of other unrelated genes in between and the relatively large distances (Figure 3-C). The  
409 classification as type A (atomised) might seem most obvious, despite the co-presence of the genes in a  
410 single scaffold, due to these large distances. However, the definition of type D (disorganised) does allow  
411 for the presence of non-Hox genes in between members of the cluster (Figure 3-A). Thus, it is difficult to  
412 clearly categorise the recovered "cluster", but it does remain clear that these genes are not as tightly  
413 bundled as they are in other Bilateria lineages. The *A. dux* Hox "cluster" is spread across 11 Mb of a 38  
414 Mb scaffold, and this suggests a far larger size range in the cephalopods than in other described animals,  
415 as recently suggested based on the genome of *E. scolopes* [50]. It is possible that this is the reason for  
416 the apparent atomisation of Hox genes in the more fragmented *O. bimaculoides* assembly. Hox clusters  
417 are usually found in contigs of around 100 kb length in vertebrates [6, 7] and between 500 – 10,000 kb

418 in invertebrates [8] An assembled contig easily containing the complete cluster for these smaller cluster  
419 sizes, would manage to cover only one member of the Hox gene cluster in the studied coleoids. As such,  
420 our results suggest that the Hox cluster may not be fully atomised in *O. bimaculoides* as previously  
421 hypothesised. Further improvements of genome assemblies in cephalopods will be required to address  
422 this question. The biological reason for this dramatic increase in the distance between the genes in the  
423 Hox cluster presents an intriguing avenue of future research. The homeodomain of all the obtained Hox  
424 genes in cephalopods were compared with those of other mollusks. Few differences were found relative  
425 to a previous study [62], as no significant modifications were observed in Hox1, Hox4, ANTP, Lox2, Lox5,  
426 Post1 and Post2. Hox1 did, however, show reduced conservation in residues 22 to 25 in the *A. dux*  
427 sequence. This observation for Hox1 in *A. dux* is visible only in the Pacbio assembly. Additionally, the  
428 Hox3 homeodomain analysis supports a basal placement of the nautiloids within cephalopods. The Lox4  
429 gene was the most variable among all groups. As of to date, Hox2 still remains undetected in the coleoid  
430 cephalopods [63]. Assembly errors notwithstanding, gain and loss of Hox genes has been attributed to  
431 fundamental changes in animal body plans, and the apparent loss of Hox2 may therefore be significant.  
432 For example, Hox gene loss has been associated with the reduced body-plan segmentation of spider  
433 mites [42]. The circumstance that Hox2 has been readily found in *Nautilus*, but remains undetected in all  
434 coleoids sequenced thus far, might signify an important developmental split within the Cephalopoda.  
435 Alternatively, and equally intriguing, this Hox gene may have undergone such drastic evolutionary  
436 modifications that it is presently undetectable by conventional means.

437 On a final note, we analyzed genes encoding reflectins, a class of cephalopod-specific proteins first  
438 described in *E. scolopes* [64]. Reflectins form flat structures that reflect ambient light (other marine  
439 animals use purine-based platelets), thus modulating iridescence for communication or camouflage  
440 purposes [65]. The giant squid genome contains seven reflectin genes and three reflectin-like genes  
441 (Supplementary Figure S3). All of these genes, with the exception of one reflectin gene, appear on the

442 same scaffold, which corresponds very well with the distribution pattern of octopus reflectin genes  
443 [11]).

## 444 [Conclusions](#)

445 Not only because of its astonishing proportions, but also for the lack of knowledge of the key facets of  
446 its deep-sea lifestyle, the giant squid has long captured the imagination of scientists and the general  
447 public alike. With the release of this annotated giant squid genome, we set the stage for future research  
448 into the enigmas that enshroud this truly awe-inspiring creature. Further, given the paucity of available  
449 cephalopod genomes, we provide a valuable contribution to the genomic description of cephalopods,  
450 and more widely to the growing number of fields that are recognizing the potential, which this group of  
451 behaviourally advanced invertebrates holds for improving our understanding of the diversity of life on  
452 Earth in general.

## 453 [Availability of supporting data](#)

454 The data sets supporting the results of this article are available in the NCBI database a Bioproject  
455 PRJNA534469. The three transcriptome data sets (TSA) have ids GHKK01000000, GHKL01000000 and  
456 GHKH01000000 and the sequence data used for the genome assemblies has id VCCN01000000.

## 457 [Additional files](#)

458 Supplement.txt. Supplementary methods, tables and figures.

## 459 [Declarations](#)

## 460 [Abbreviations](#)

461 Gb: gigabase pairs; Mb: megabase pairs; BUSCO: Benchmarking Universal Single-copy Orthologs; bp:  
462 base pair; NCBI: National Center for Biotechnology Information; LC-MS/MS: liquid chromatography (LC)  
463 tandem mass spectrometry (MS); CCB: Colloidal Coomassie Brilliant Blue; HCD: higher-energy collisional

464 dissociation; NCE: normalized collisional energy; AGC: Automatic Gain Control; ALC: Average Local  
465 Confidence; SP: SwissProt; Uf: UniRef90; CDD: conserved domain database; CM: covariance model; TE:  
466 transposable element; LINE: Long interspersed nuclear element; SINE: Short interspersed nuclear  
467 element; LRT: long terminal repeat.

#### 468 [Ethics statement](#)

469 Sampling followed the recommendations from Moltschaniwskyj et al., 2007 [23].

#### 470 [Consent for publication](#)

471 Not applicable.

#### 472 [Competing interests](#)

473 The authors declare that they have no competing interests.

#### 474 [Funding](#)

475 R.R.F. thanks the Villum Fonden for grant VKR023446 (Villum Fonden Young Investigator Grant), the  
476 Portuguese Science Foundation (FCT) for grant PTDC/MAR/115347/2009;COMPETE-FCOMP-01-012;  
477 FEDER-015453, Marie Curie Actions (FP7-PEOPLE-2010-IEF, Proposal 272927), and the Danish National  
478 Research Foundation (DNRF96) for its funding of the Center for Macroecology, Evolution, and Climate.  
479 H.O. thanks the Rede Nacional de Espectrometria de Massa, ROTEIRO/0028/2013, ref. LISBOA-01-0145-  
480 FEDER-022125, supported by COMPETE and North Portugal Regional Operational Programme  
481 (Norte2020), under the PORTUGAL 2020 Partnership Agreement, through the European Regional  
482 Development Fund (ERDF). A.C. thanks FCT for project UID/Multi/04423/2019. M.P. acknowledges the  
483 support from the Wellcome Trust (grant number WT108749/Z/15/Z) and the European Molecular  
484 Biology Laboratory. M.P.T.G. thanks the Danish National Research Foundation for its funding of the  
485 Center for GeoGenetics (grant DNRF94) and Lundbeck Foundation for grant R52-5062 on Pathogen

486 Palaeogenomics. S.R. was supported by the Novo Nordisk Foundation grant NNF14CC0001. A.H. is  
487 supported by a Biotechnology and Biological Sciences Research Council David Phillips Fellowship  
488 [fellowship reference: BB/N020146/1]. T.B. is supported by the Biotechnology and Biological Sciences  
489 Research Council-funded South West Biosciences Doctoral Training Partnership [training grant reference  
490 BB/M009122/1]. This work was partially funded by the Lundbeck Foundation (R52-A4895 to BB).

491 HJTH was supported by the David and Lucile Packard Foundation, the Netherlands Organization for  
492 Scientific Research (#825.09.016) and currently by the Deutsche Forschungsgemeinschaft (DFG) under  
493 grant HO 5569/1-2 (Emmy Noether Junior Research Group). T.V. and B.Br. were supported by grants  
494 from the Slovak grant agency VEGA (1/0684/16, 1/0458/18). Computation for the work described in this  
495 paper was partially supported by the DeiC National Life Science Supercomputer at DTU.

#### 496 [Authors contributions](#)

497 R.D.F. and M.T.P.G. designed the study. J.S., H-J.H. AND R.T. carried out the sampling. Alex.C., A.R., B.F.,  
498 G.C.A.Jr, H.O. and I.W. performed the laboratory work. R.D.F., Alv.C., A.M., C.B.A., F.S., P.G., T.B., A.H.,  
499 I.B.H., C.C., B.P., F.P., M.P., F.M., O.S., S.R., M.Z.R. and D.P. analyzed the data. E.J., G.Z., J.V., O.F. and Q.L.  
500 contributed with genomic resources. R.D.F., L.F.C.C., A.A., Y.W., B.M., R.S., T.V., B.B., T.S-P., M.T.P.G.  
501 contributed with supervision and computational resources. R.R.F., T.S-P., R.N., M.T.P.G paid for  
502 sequencing. R.D.F. wrote the manuscript with contributions from all authors. All authors have read and  
503 approved the manuscript.

504

#### 505 [Acknowledgments](#)

506 We would like to thank Anders Hansen, Tobias Mourier, Kristin Rós Kjartansdóttir and Lars Hestbjerg  
507 Hansen for help with generating sequencing data; Shawn Hoon for sharing transcriptome data; Annie  
508 Lingren for help with sample shipping; Peter Smith for providing samples and the support of the entire  
509 team at Dovetail.

510 **References**

- 511 1. Zullo L, Hochner B. A new perspective on the organization of an invertebrate brain. *Commun Integr*  
512 *Biol* [Internet]. Taylor & Francis; 2011 [cited 2019 Feb 19];4:26–9. Available from:  
513 <http://www.ncbi.nlm.nih.gov/pubmed/21509172>
- 514 2. Nixon M, Young JZ. *The brains and lives of cephalopods*. Oxford: Oxford University Press, Oxford;  
515 2003.
- 516 3. Doubleday ZA, Prowse TAA, Arkhipkin A, Pierce GJ, Semmens J, Steer M, et al. Global proliferation of  
517 cephalopods. *Curr Biol* [Internet]. 2016 [cited 2019 May 2];26:R406–7. Available from:  
518 <http://www.ncbi.nlm.nih.gov/pubmed/27218844>
- 519 4. Vecchione M, Allcock L, Piatkowski U, Jorgensen E, Barratt I. Persistent Elevated Abundance of  
520 Octopods in an Overfished Antarctic Area. *Smithson Poles Contrib to Int Polar Year Sci* [Internet].  
521 Smithsonian Institution Scholarly Press; 2009 [cited 2019 May 2]. p. 197–204. Available from:  
522 <https://repository.si.edu/handle/10088/6827>
- 523 5. Young RE, Vecchione M, Mangold KM. *Cephalopoda, Cuvier 1797* [Internet]. *Tree Life*. 2018. Available  
524 from: <http://tolweb.org/Cephalopoda/19386>
- 525 6. Roper CF, Sweeney MJ, Nauen CE. *FAO Species Catalogue Vol. 3. Cephalopods of the world. An*  
526 *annotated and illustrated catalogue of species of interest to fisheries. FAO Fish Synopsis* [Internet].  
527 Rome; 1984;125:277. Available from: <http://www.fao.org/3/ac479e/ac479e00.htm>
- 528 7. Jereb P, Roper CFE. *Cephalopods of the world. An annotated and illustrated catalogue of cephalopod*  
529 *species known to date. Myopsid and Oegopsid Squids. FAO Species Cat Fish Purp* [Internet]. Food and  
530 Agriculture Organization of the United Nations; 2010 [cited 2019 Feb 19];2:605. Available from:  
531 <http://www.fao.org/3/i1920e/i1920e00.htm>



532 8. McClain CR, Balk MA, Benfield MC, Branch TA, Chen C, Cosgrove J, et al. Sizing ocean giants: patterns  
533 of intraspecific size variation in marine megafauna. PeerJ [Internet]. PeerJ Inc.; 2015 [cited 2019 May  
534 15];3:e715. Available from: <https://peerj.com/articles/715>

535 9. Paxton CGM. Unleashing the Kraken: on the maximum length in giant squid (*Architeuthis* sp.). J Zool  
536 [Internet]. 2016 [cited 2019 May 15];300:82–8. Available from:  
537 <https://zslpublications.onlinelibrary.wiley.com/doi/pdf/10.1111/jzo.12347>

538 10. Rosa R, Seibel BA. Slow pace of life of the Antarctic colossal squid. J Mar Biol Assoc United Kingdom  
539 [Internet]. Cambridge University Press; 2010 [cited 2019 May 2];90:1375–8. Available from:  
540 [https://www.cambridge.org/core/product/identifier/S0025315409991494/type/journal\\_article](https://www.cambridge.org/core/product/identifier/S0025315409991494/type/journal_article)

541 11. Albertin CB, Simakov O, Mitros T, Wang ZY, Pungor JR, Edsinger-Gonzales E, et al. The octopus  
542 genome and the evolution of cephalopod neural and morphological novelties. Nature [Internet]. Nature  
543 Publishing Group; 2015 [cited 2018 May 2];524:220–4. Available from:  
544 <http://www.nature.com/articles/nature14668>

545 12. Liscovitch-Brauer N, Alon S, Porath HT, Elstein B, Unger R, Ziv T, et al. Trade-off between  
546 Transcriptome Plasticity and Genome Evolution in Cephalopods. Cell [Internet]. 2017 [cited 2019 May  
547 2];169:191–202.e11. Available from: <http://www.ncbi.nlm.nih.gov/pubmed/28388405>

548 13. Gilly WF, Beman JM, Litvin SY, Robison BH. Oceanographic and Biological Effects of Shoaling of the  
549 Oxygen Minimum Zone. Ann Rev Mar Sci [Internet]. 2013 [cited 2019 Feb 19];5:393–420. Available from:  
550 <http://www.ncbi.nlm.nih.gov/pubmed/22809177>

551 14. Golikov AV, Sabirov RM, Lubin PA, Jørgensen LL. Changes in distribution and range structure of Arctic  
552 cephalopods due to climatic changes of the last decades. Biodiversity [Internet]. Taylor & Francis Group  
553 ; 2013 [cited 2019 Feb 19];14:28–35. Available from:

554 <http://www.tandfonline.com/doi/abs/10.1080/14888386.2012.702301>

555 15. Balmaseda MA, Trenberth KE, Källén E. Distinctive climate signals in reanalysis of global ocean heat  
556 content. *Geophys Res Lett* [Internet]. John Wiley & Sons, Ltd; 2013 [cited 2019 Feb 19];40:1754–9.  
557 Available from: <http://doi.wiley.com/10.1002/grl.50382>

558 16. Bustamante P, González AF, Rocha F, Miramand P, Guerra A. Metal and metalloid concentrations in  
559 the giant squid *Architeuthis dux* from Iberian waters. *Mar Environ Res* [Internet]. 2008 [cited 2019 Feb  
560 19];66:278–87. Available from: <http://www.ncbi.nlm.nih.gov/pubmed/18514304>

561 17. Unger MA, Harvey E, Vadas GG, Vecchione M. Persistent pollutants in nine species of deep-sea  
562 cephalopods. *Mar Pollut Bull* [Internet]. 2008 [cited 2019 Feb 19];56:1498–500. Available from:  
563 <https://linkinghub.elsevier.com/retrieve/pii/S0025326X0800218X>

564 18. Winkelmann I, Campos PF, Strugnell J, Cherel Y, Smith PJ, Kubodera T, et al. Mitochondrial genome  
565 diversity and population structure of the giant squid *Architeuthis*: genetics sheds new light on one of the  
566 most enigmatic marine species. *Proceedings Biol Sci* [Internet]. 2013 [cited 2019 Apr 4];280:20130273.  
567 Available from: <http://rspb.royalsocietypublishing.org/cgi/doi/10.1098/rspb.2013.0273>

568 19. Chikhi R, Medvedev P. Informed and automated k-mer size selection for genome assembly.  
569 *Bioinformatics* [Internet]. Oxford University Press; 2014 [cited 2016 Aug 11];30:31–7. Available from:  
570 <http://www.ncbi.nlm.nih.gov/pubmed/23732276>

571 20. Chapman J a, Ho I, Sunkara S, Luo S, Schroth GP, Rokhsar DS. Meraculous: de novo genome assembly  
572 with short paired-end reads. *PLoS One* [Internet]. 2011 [cited 2013 Feb 28];6:e23501. Available from:  
573 [http://www.pubmedcentral.nih.gov/articlerender.fcgi?artid=3158087&tool=pmcentrez&rendertype=ab](http://www.pubmedcentral.nih.gov/articlerender.fcgi?artid=3158087&tool=pmcentrez&rendertype=abstract)  
574 [stract](http://www.pubmedcentral.nih.gov/articlerender.fcgi?artid=3158087&tool=pmcentrez&rendertype=abstract)

575 21. English AC, Richards S, Han Y, Wang M, Vee V, Qu J, et al. Mind the Gap: Upgrading Genomes with

576 Pacific Biosciences RS Long-Read Sequencing Technology. Liu Z, editor. PLoS One [Internet]. 2012 [cited  
577 2019 Apr 4];7:e47768. Available from: <http://www.ncbi.nlm.nih.gov/pubmed/23185243>

578 22. Simão FA, Waterhouse RM, Ioannidis P, Kriventseva E V., Zdobnov EM. BUSCO: assessing genome  
579 assembly and annotation completeness with single-copy orthologs. Bioinformatics [Internet]. 2015  
580 [cited 2019 Apr 8];31:3210–2. Available from: [https://academic.oup.com/bioinformatics/article-](https://academic.oup.com/bioinformatics/article-lookup/doi/10.1093/bioinformatics/btv351)  
581 [lookup/doi/10.1093/bioinformatics/btv351](https://academic.oup.com/bioinformatics/article-lookup/doi/10.1093/bioinformatics/btv351)

582 23. Moltschanivskyj NA, Hall K, Lipinski MR, Marian JEAR, Nishiguchi M, Sakai M, et al. Ethical and  
583 welfare considerations when using cephalopods as experimental animals. Rev Fish Biol Fish [Internet].  
584 Kluwer Academic Publishers; 2007 [cited 2019 Jun 22];17:455–76. Available from:  
585 <http://link.springer.com/10.1007/s11160-007-9056-8>

586 24. Patel RK, Jain M. NGS QC Toolkit: A Toolkit for Quality Control of Next Generation Sequencing Data.  
587 Liu Z, editor. PLoS One [Internet]. Public Library of Science; 2012 [cited 2018 Jul 31];7:e30619. Available  
588 from: <http://dx.plos.org/10.1371/journal.pone.0030619>

589 25. Martin M. Cutadapt removes adapter sequences from high-throughput sequencing reads.  
590 EMBnet.journal [Internet]. 2011;17:10–2. Available from:  
591 <http://journal.embnet.org/index.php/embnetjournal/article/view/200>

592 26. Haas BJ, Papanicolaou A, Yassour M, Grabherr M, Blood PD, Bowden J, et al. De novo transcript  
593 sequence reconstruction from RNA-seq using the Trinity platform for reference generation and analysis.  
594 Nat Protoc [Internet]. NIH Public Access; 2013 [cited 2018 Jun 24];8:1494–512. Available from:  
595 <http://www.ncbi.nlm.nih.gov/pubmed/23845962>

596 27. Gilbert D. Gene-omes built from mRNA seq not genome DNA [Internet]. Notre Dame: 7th annual  
597 arthropod genomics symposium; 2013. Available from: <http://globalhealth.nd.edu/7th-annual->

598 arthropod-genomics-symposium/

599 28. Kleffmann T, Russenberger D, von Zychlinski A, Christopher W, Sjölander K, Gruissem W, et al. The  
600 Arabidopsis thaliana chloroplast proteome reveals pathway abundance and novel protein functions.  
601 Curr Biol [Internet]. 2004 [cited 2014 Aug 23];14:354–62. Available from:  
602 <http://www.ncbi.nlm.nih.gov/pubmed/15028209>

603 29. Bradford MM. A rapid and sensitive method for the quantitation of microgram quantities of protein  
604 utilizing the principle of protein-dye binding. Anal Biochem [Internet]. 1976 [cited 2019 Mar 28];72:248–  
605 54. Available from: <http://www.ncbi.nlm.nih.gov/pubmed/942051>

606 30. Santos R, da Costa G, Franco C, Gomes-Alves P, Flammang P, Coelho A V. First Insights into the  
607 Biochemistry of Tube Foot Adhesive from the Sea Urchin *Paracentrotus lividus* (Echinoidea,  
608 Echinodermata). Mar Biotechnol [Internet]. 2009 [cited 2019 Mar 28];11:686–98. Available from:  
609 <http://www.ncbi.nlm.nih.gov/pubmed/19221839>

610 31. Neuhoff V, Arold N, Taube D, Ehrhardt W. Improved staining of proteins in polyacrylamide gels  
611 including isoelectric focusing gels with clear background at nanogram sensitivity using Coomassie  
612 Brilliant Blue G-250 and R-250. Electrophoresis [Internet]. John Wiley & Sons, Ltd; 1988 [cited 2019 Mar  
613 28];9:255–62. Available from: <http://doi.wiley.com/10.1002/elps.1150090603>

614 32. Brejová B, Vinar T, Chen Y, Wang S, Zhao G, Brown DG, et al. Finding genes in *Schistosoma*  
615 japonicum: annotating novel genomes with help of extrinsic evidence. Nucleic Acids Res [Internet]. 2009  
616 [cited 2016 Mar 10];37:e52. Available from:  
617 [http://www.pubmedcentral.nih.gov/articlerender.fcgi?artid=2673418&tool=pmcentrez&rendertype=ab](http://www.pubmedcentral.nih.gov/articlerender.fcgi?artid=2673418&tool=pmcentrez&rendertype=abstract)  
618 [stract](http://www.pubmedcentral.nih.gov/articlerender.fcgi?artid=2673418&tool=pmcentrez&rendertype=abstract)

619 33. Musacchia F, Basu S, Petrosino G, Salvemini M, Sanges R. Annocript: a flexible pipeline for the

620 annotation of transcriptomes able to identify putative long noncoding RNAs. *Bioinformatics* [Internet].  
621 2015 [cited 2016 Mar 14];31:2199–201. Available from:  
622 <http://bioinformatics.oxfordjournals.org/content/early/2015/02/19/bioinformatics.btv106>

623 34. Camacho C, Coulouris G, Avagyan V, Ma N, Papadopoulos J, Bealer K, et al. BLAST+: architecture and  
624 applications. *BMC Bioinformatics* [Internet]. 2009 [cited 2014 Jul 9];10:421. Available from:  
625 [http://www.pubmedcentral.nih.gov/articlerender.fcgi?artid=2803857&tool=pmcentrez&rendertype=ab](http://www.pubmedcentral.nih.gov/articlerender.fcgi?artid=2803857&tool=pmcentrez&rendertype=abstract)  
626 [stract](http://www.pubmedcentral.nih.gov/articlerender.fcgi?artid=2803857&tool=pmcentrez&rendertype=abstract)

627 35. Burge SW, Daub J, Eberhardt R, Tate J, Barquist L, Nawrocki EP, et al. Rfam 11.0: 10 years of RNA  
628 families. *Nucleic Acids Res* [Internet]. Narnia; 2013 [cited 2019 Apr 4];41:D226–32. Available from:  
629 <http://academic.oup.com/nar/article/41/D1/D226/1050811/Rfam-110-10-years-of-RNA-families>

630 36. Gardner PP, Daub J, Tate J, Moore BL, Osuch IH, Griffiths-Jones S, et al. Rfam: Wikipedia, clans and  
631 the “decimal” release. *Nucleic Acids Res* [Internet]. Narnia; 2011 [cited 2019 Apr  
632 4];39:D141–5. Available from: <https://academic.oup.com/nar/article-lookup/doi/10.1093/nar/gkq1129>

633 37. Freyhult EK, Bollback JP, Gardner PP. Exploring genomic dark matter: a critical assessment of the  
634 performance of homology search methods on noncoding RNA. *Genome Res* [Internet]. Cold Spring  
635 Harbor Laboratory Press; 2007 [cited 2019 Apr 4];17:117–25. Available from:  
636 <http://www.ncbi.nlm.nih.gov/pubmed/17151342>

637 38. Chan PP, Lowe TM. GtRNADB: a database of transfer RNA genes detected in genomic sequence.  
638 *Nucleic Acids Res* [Internet]. Narnia; 2009 [cited 2019 Apr 4];37:D93–7. Available from:  
639 <https://academic.oup.com/nar/article-lookup/doi/10.1093/nar/gkn787>

640 39. Lowe TM, Eddy SR. tRNAscan-SE: a program for improved detection of transfer RNA genes in  
641 genomic sequence. *Nucleic Acids Res* [Internet]. 1997 [cited 2019 Apr 4];25:955–64. Available from:

642 <http://www.ncbi.nlm.nih.gov/pubmed/9023104>

643 40. Smit AFA, Hubley RR, Green PR. RepeatMasker Open-4.0. 2013.

644 41. Bao W, Kojima KK, Kohany O. Repbase Update, a database of repetitive elements in eukaryotic  
645 genomes. *Mob DNA [Internet]*. 2015 [cited 2019 Apr 17];6:11. Available from:  
646 <http://www.ncbi.nlm.nih.gov/pubmed/26045719>

647 42. Smit A, Hubley R. RepeatModeler Open-1.0. 2015.

648 43. Bao Z, Eddy SR. Automated de novo identification of repeat sequence families in sequenced  
649 genomes. *Genome Res [Internet]*. 2002 [cited 2019 Apr 17];12:1269–76. Available from:  
650 <http://www.genome.org/cgi/doi/10.1101/gr.88502>

651 44. Price AL, Jones NC, Pevzner PA. De novo identification of repeat families in large genomes.  
652 *Bioinformatics [Internet]*. 2005 [cited 2019 Apr 17];21:i351–8. Available from:  
653 <http://www.ncbi.nlm.nih.gov/pubmed/15961478>

654 45. Platt RN, Blanco-Berdugo L, Ray DA. Accurate Transposable Element Annotation Is Vital When  
655 Analyzing New Genome Assemblies. *Genome Biol Evol [Internet]*. 2016 [cited 2019 Apr 17];8:403–10.  
656 Available from: <https://academic.oup.com/gbe/article-lookup/doi/10.1093/gbe/evw009>

657 46. Schnable PS, Ware D, Fulton RS, Stein JC, Wei F, Pasternak S, et al. The B73 Maize Genome:  
658 Complexity, Diversity, and Dynamics. *Science (80- ) [Internet]*. 2009 [cited 2019 Apr 17];326:1112–5.  
659 Available from: <http://www.ncbi.nlm.nih.gov/pubmed/19965430>

660 47. Wu C, Twort VG, Crowhurst RN, Newcomb RD, Buckley TR. Assembling large genomes: analysis of  
661 the stick insect (*Clitarchus hookeri*) genome reveals a high repeat content and sex-biased genes  
662 associated with reproduction. *BMC Genomics [Internet]*. 2017 [cited 2019 Apr 17];18:884. Available  
663 from: <http://www.ncbi.nlm.nih.gov/pubmed/29145825>

- 664 48. Initial sequencing and analysis of the human genome. *Nature* [Internet]. Nature Publishing Group;  
665 2001 [cited 2019 Apr 17];409:860–921. Available from: <http://www.nature.com/articles/35057062>
- 666 49. Kim B-M, Kang S, Ahn D-H, Jung S-H, Rhee H, Yoo JS, et al. The genome of common long-arm octopus  
667 *Octopus minor*. *Gigascience* [Internet]. 2018 [cited 2019 Apr 17];7. Available from:  
668 <http://www.ncbi.nlm.nih.gov/pubmed/30256935>
- 669 50. Belcaid M, Casaburi G, McAnulty SJ, Schmidbaur H, Suria AM, Moriano-Gutierrez S, et al. Symbiotic  
670 organs shaped by distinct modes of genome evolution in cephalopods. *Proc Natl Acad Sci U S A*  
671 [Internet]. National Academy of Sciences; 2019 [cited 2019 Apr 17];116:3030–5. Available from:  
672 <http://www.ncbi.nlm.nih.gov/pubmed/30635418>
- 673 51. Schrader L, Schmitz J. The impact of transposable elements in adaptive evolution. *Mol Ecol*  
674 [Internet]. 2018 [cited 2019 Apr 17];28:1537–49. Available from:  
675 <http://www.ncbi.nlm.nih.gov/pubmed/30003608>
- 676 52. Zarrella I, Herten K, Maes GE, Tai S, Yang M, Seuntjens E, et al. The survey and reference assisted  
677 assembly of the *Octopus vulgaris* genome. *Sci Data* [Internet]. Nature Publishing Group; 2019 [cited  
678 2019 Jun 9];6:13. Available from: <http://www.nature.com/articles/s41597-019-0017-6>
- 679 53. Nawrocki EP, Burge SW, Bateman A, Daub J, Eberhardt RY, Eddy SR, et al. Rfam 12.0: updates to the  
680 RNA families database. *Nucleic Acids Res* [Internet]. 2015 [cited 2019 Apr 4];43:D130–7. Available from:  
681 <http://www.ncbi.nlm.nih.gov/pubmed/25392425>
- 682 54. Cadigan KM, Nusse R. Wnt signaling: a common theme in animal development. *Genes Dev* [Internet].  
683 Cold Spring Harbor Laboratory Press; 1997 [cited 2019 May 8];11:3286–305. Available from:  
684 <http://www.ncbi.nlm.nih.gov/pubmed/9407023>
- 685 55. Cho S-J, Valles Y, Giani VC, Seaver EC, Weisblat DA. Evolutionary Dynamics of the wnt Gene Family: A

686 Lophotrochozoan Perspective. *Mol Biol Evol* [Internet]. 2010 [cited 2019 May 16];27:1645–58. Available  
687 from: <http://www.ncbi.nlm.nih.gov/pubmed/20176615>

688 56. Simakov O, Marletaz F, Cho S-J, Edsinger-Gonzales E, Havlak P, Hellsten U, et al. Insights into  
689 bilaterian evolution from three spiralian genomes. *Nature* [Internet]. 2012 [cited 2019 May  
690 16];493:526–31. Available from: <http://www.ncbi.nlm.nih.gov/pubmed/23254933>

691 57. Chen W V, Maniatis T. Clustered protocadherins. *Development* [Internet]. Company of Biologists;  
692 2013 [cited 2018 Oct 21];140:3297–302. Available from:  
693 <http://www.ncbi.nlm.nih.gov/pubmed/23900538>

694 58. Zipursky SL, Sanes JR. Chemoaffinity revisited: dscams, protocadherins, and neural circuit assembly.  
695 *Cell* [Internet]. 2010 [cited 2019 May 16];143:343–53. Available from:  
696 <https://linkinghub.elsevier.com/retrieve/pii/S0092867410011451>

697 59. Pratihari S, Prasad Nath R, Kumar Kundu J. Hox genes and its role in animal development. *Int J Sci Nat*  
698 [Internet]. 2010 [cited 2019 Apr 4];1:101–3. Available from:  
699 [http://www.scienceandnature.org/IJSN\\_V1\(2\)\\_D2010/IJSN\\_V1\(2\)\\_2.pdf](http://www.scienceandnature.org/IJSN_V1(2)_D2010/IJSN_V1(2)_2.pdf)

700 60. Fröblius AC, Matus DQ, Seaver EC. Genomic Organization and Expression Demonstrate Spatial and  
701 Temporal Hox Gene Colinearity in the Lophotrochozoan *Capitella* sp. I. Butler G, editor. *PLoS One*  
702 [Internet]. 2008 [cited 2019 Apr 4];3:e4004. Available from:  
703 <http://www.ncbi.nlm.nih.gov/pubmed/19104667>

704 61. Mallo M, Wellik DM, Deschamps J. Hox genes and regional patterning of the vertebrate body plan.  
705 *Dev Biol* [Internet]. 2010 [cited 2019 Apr 4];344:7–15. Available from:  
706 <http://www.ncbi.nlm.nih.gov/pubmed/20435029>

707 62. Pernice M, Deutsch JS, Andouche A, Boucher-Rodoni R, Bonnaud L. Unexpected variation of Hox



708 genes' homeodomains in cephalopods. *Mol Phylogenet Evol* [Internet]. Academic Press; 2006 [cited  
709 2019 Apr 4];40:872–9. Available from:  
710 <https://www.sciencedirect.com/science/article/pii/S1055790306001369?via%3Dihub>

711 63. Barucca M, Canapa A, Biscotti MA, Zappavigna V. An Overview of Hox Genes in Lophotrochozoa:  
712 Evolution and Functionality. *J Dev Biol* [Internet]. Multidisciplinary Digital Publishing Institute (MDPI);  
713 2016 [cited 2019 Apr 4];4:1–15. Available from: <http://www.ncbi.nlm.nih.gov/pubmed/29615580>

714 64. Crookes WJ, Ding L-L, Huang QL, Kimbell JR, Horwitz J, McFall-Ngai MJ. Reflectins: The Unusual  
715 Proteins of Squid Reflective Tissues. *Science* (80- ) [Internet]. 2004 [cited 2019 Feb 19];303:235–8.  
716 Available from: <http://www.ncbi.nlm.nih.gov/pubmed/14716016>

717 65. Wardill TJ, Gonzalez-Bellido PT, Crook RJ, Hanlon RT. Neural control of tuneable skin iridescence in  
718 squid. *Proc R Soc B Biol Sci* [Internet]. The Royal Society; 2012 [cited 2019 May 16];279:4243–52.  
719 Available from: <http://rspb.royalsocietypublishing.org/cgi/doi/10.1098/rspb.2012.1374>

720 66. Pace RM, Grbić M, Nagy LM. Composition and genomic organization of arthropod Hox clusters.  
721 *Evodevo* [Internet]. BioMed Central; 2016 [cited 2019 Oct 27];7:11. Available from:  
722 <http://evodevojournal.biomedcentral.com/articles/10.1186/s13227-016-0048-4>

723

724

726 **Table 1.** Statistics of the giant squid genome assembly (Meraculous + Dovetail) and corresponding gene  
 727 prediction and functional annotation. The transcript evidence was confirmed by blastp hits with e-value  
 728  $< 10E^{-6}$  using the transcriptomes of three other species of squid (see the “Transcriptome sequencing”  
 729 section).

730

| <b>Global Statistics</b>                                    |               |                                  |
|-------------------------------------------------------------|---------------|----------------------------------|
| <b>Genome assembly*</b>                                     | <b>Genome</b> | <b>Gene models with evidence</b> |
| Input assembly                                              | Meraculous    |                                  |
| Contig N50 length (Mb)                                      | 0.005         |                                  |
| Longest contig (Mb)                                         | 0.120         |                                  |
| Scaffold N50 length (Mb)                                    | 4.852         |                                  |
| Longest scaffold (Mb)                                       | 32.889        |                                  |
| Total length (Gb)                                           | 2.693         |                                  |
| <b>BUSCO statistics (<sup>1</sup>Euk / <sup>2</sup>Met)</b> |               |                                  |
| Complete BUSCOs, (%)                                        | 86.1 / 88.5   | 81.6 / 78.3                      |
| Complete and single-copy, (%)                               | 85.1 / 87.6   | 79.9 / 77.7                      |
| Complete and duplicated, (%)                                | 1.0 / 0.9     | 1.7 / 0.6                        |
| Partial, (%)                                                | 4.3 / 3.6     | 9.6 / 5.7                        |
| Missing, (%)                                                | 9.6 / 7.9     | 8.8 / 16.0                       |
| Total Buscos found, (%)                                     | 90.4 / 92.1   | 91.2 / 84.0                      |
| <b>Genome annotation / Gene Prediction</b>                  |               |                                  |
| Protein-coding gene number                                  | 33,406        |                                  |
| Transcript evidence                                         | 30,472        |                                  |
| Average Protein length, (aa)                                | 339           |                                  |
| Longest Protein, (aa)                                       | 17,047        |                                  |
| Average CDS length, (bp)                                    | 1,015         |                                  |
| Longest CDS, (bp)                                           | 51,138        |                                  |

|                           |     |
|---------------------------|-----|
| Average exon length, (bp) | 199 |
| Average exons per gene    | 5   |

---

**Functional annotation (Number of Hits)**

---

|                                  |        |
|----------------------------------|--------|
| Swissprot                        | 15,749 |
| Uniref90                         | 29,553 |
| GO Terms                         | 4,712  |
| Conserved Domains Database (CDD) | 15,280 |

---

\*The presented statistics are to contigs/scaffolds with length  $\geq$  500 bp.

<sup>1</sup>Euk: Database of Eukaryota orthologs genes, containing a total of 303 BUSCO groups.

<sup>2</sup>Met: Database of Metazoa orthologs genes, containing a total of 978 BUSCO groups.

731

732

733

734

## 735 Figure legends

736 **Figure 1.** Comparison of genome repeat content among available cephalopod genomes with assembled  
737 genomes (repeat data for *O. minor* and *O. bimaculoides* from [49] and for *E. scolopes* from [50]). The  
738 tree indicates evolutionary relationships among the two available octopod cephalopods and the two  
739 available decapod cephalopods. Pie charts are scaled according to genome size (*O. bimaculoides*: 2.7Gb,  
740 *O. minor*: 5.09Gb, *E. scolopes*: 5.1Gb, *A. dux*: 2.7Gb), with different repeat types indicated by the colours  
741 presented in the key.

742 **Figure 2. A)** Stacked bar chart illustrating the proportions (expressed as percentage of the total genome)  
743 of repeats found in genic ( $\leq 2$ kb from an annotated gene) and intergenic regions ( $> 2$ kb from an  
744 annotated gene) for the giant squid genome. **B)** Transposable element (TE) accumulation history in the  
745 giant squid genome, based on a Kimura distance-based copy divergence analysis of TEs, with Kimura  
746 substitution level (CpG adjusted) illustrated on the x-axis, and percentage of the genome represented by  
747 each repeat type on the y-axis. Repeat type is indicated by the colour chart below the x-axis.

748 **Figure 3.** Schematic representation of the Hox gene clusters. Different scaffolds are separated by two  
749 slashes. **A)** Simplified classification of the Hox clusters genomic organisation. Type A identifies the lack of  
750 a “typical” Hox cluster configuration, i.e. genes are scattered through the genome (not closely placed);  
751 Type S indicates a Hox cluster that is separated by a chromosomal breakpoint; Type D clusters  
752 comprehend all the genes in the same location but encompassing a larger region than in organised  
753 clusters and may display non-Hox genes and repeats in between; Type O indicates a very compact  
754 cluster embracing a short region with only Hox genes. Non-coding RNA and miRNA can be found. **B)**  
755 Simplified scheme of the chromosomal organisation in various invertebrates. Scaffold length is shown  
756 underneath. Unlike in other coleoids, for *Architeuthis dux* all Hox genes were found in the same scaffold.  
757 However, the distance between the genes was larger than expected for invertebrate organisms, and

758 non-homeobox genes were also present within the cluster. Hox2 remains undetected in coleoids. *A. dux*  
759 cluster can be found in scaffold25. *E. scolopes*, *O. bimaculoides*, *L. gigantea*, *C. teleta* and *D.*  
760 *melanogaster* assemblies and Hox cluster details can be found in [11,50,56,66]. (\*) This gene was  
761 reported in a different scaffold, adjacent to non-Hox genes (the length corresponds to the size of the  
762 gene). **C)** Complete representation of the Hox cluster found in *A. dux* including the non-Hox genes. PO –  
763 Predicted open reading frame; TATDN2 – Putative deoxyribonuclease TATDN2; ZMYM1 – Zinc finger  
764 MYM-type protein 1; POGK – Pogo transposable element with KRAB; Zinc finger – Zinc finger protein;  
765 MYB-like – Putative Myb-like DNA-binding domain protein; MAPRE1 – Microtubule-associated protein  
766 RP/EB family member 1; MGC12965 – Similar to Cytochrome c, somatic.

767

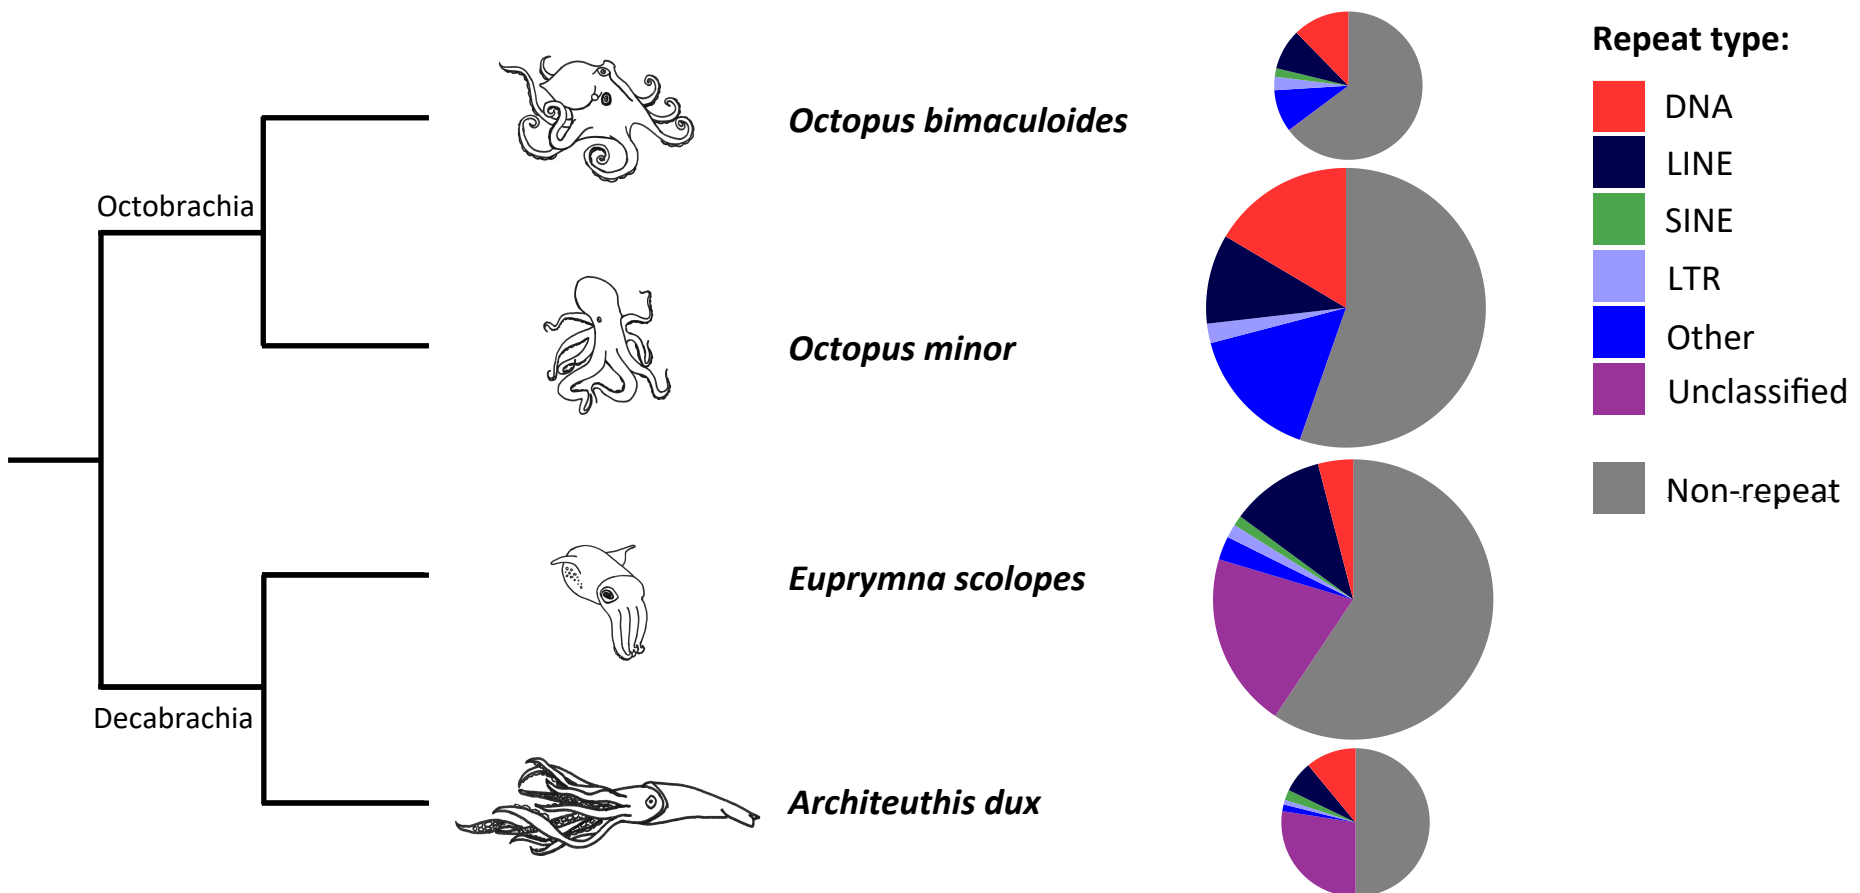

**A**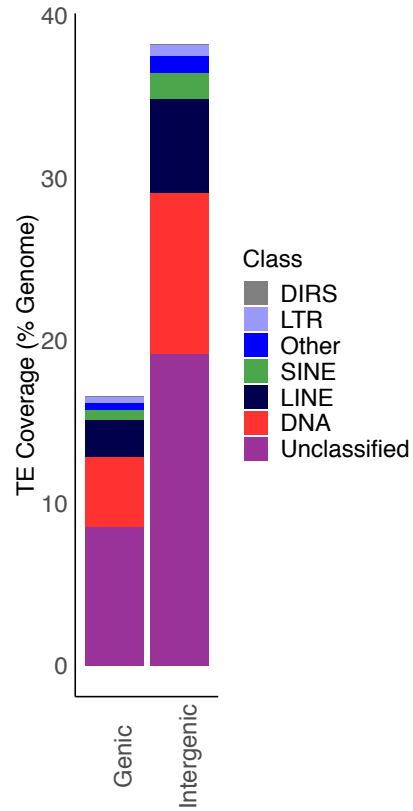**B**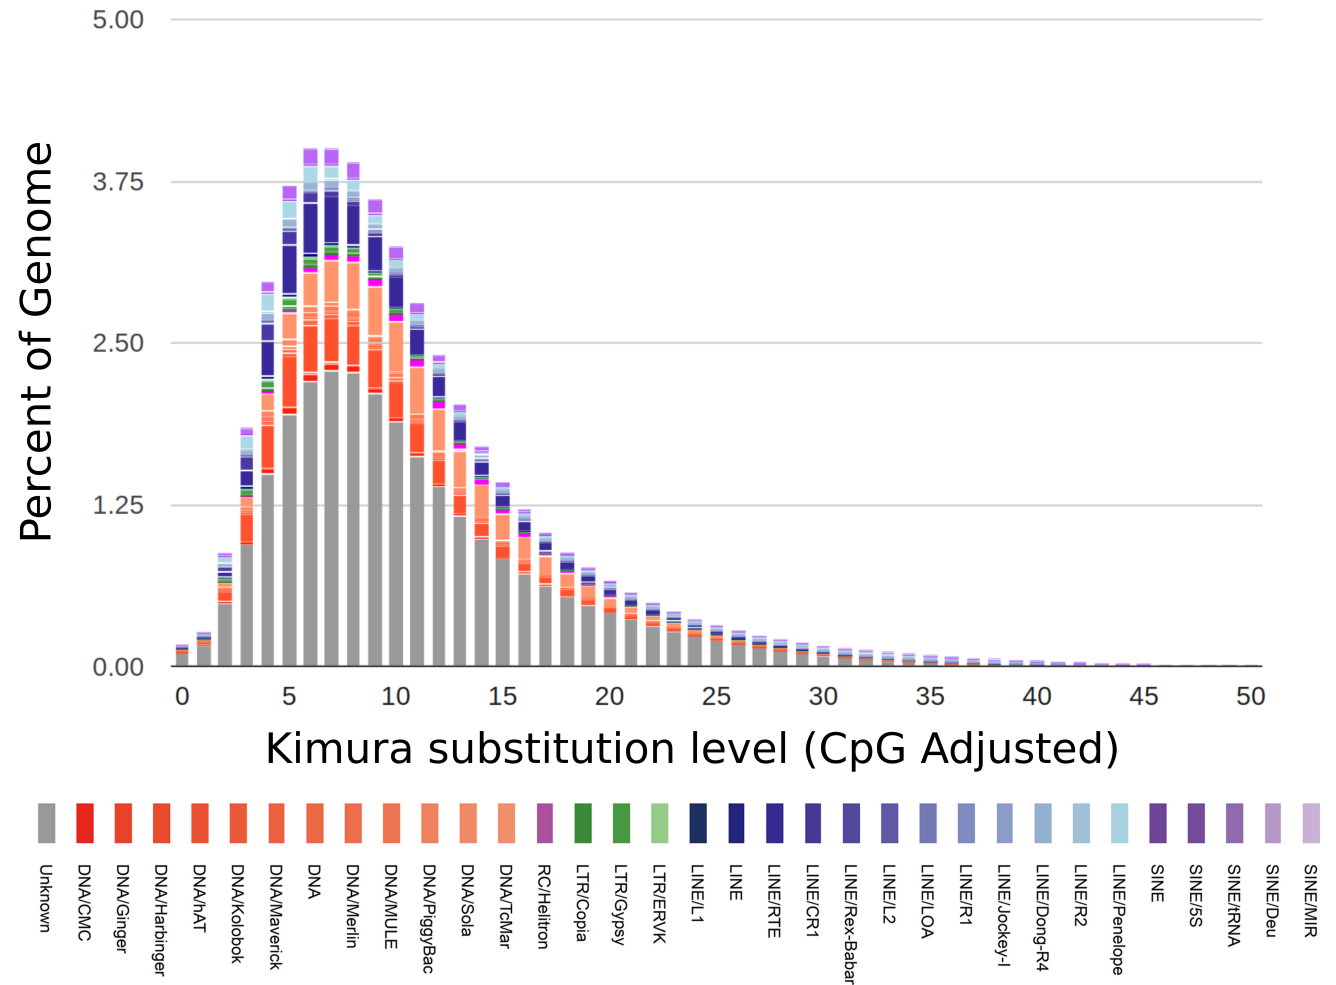

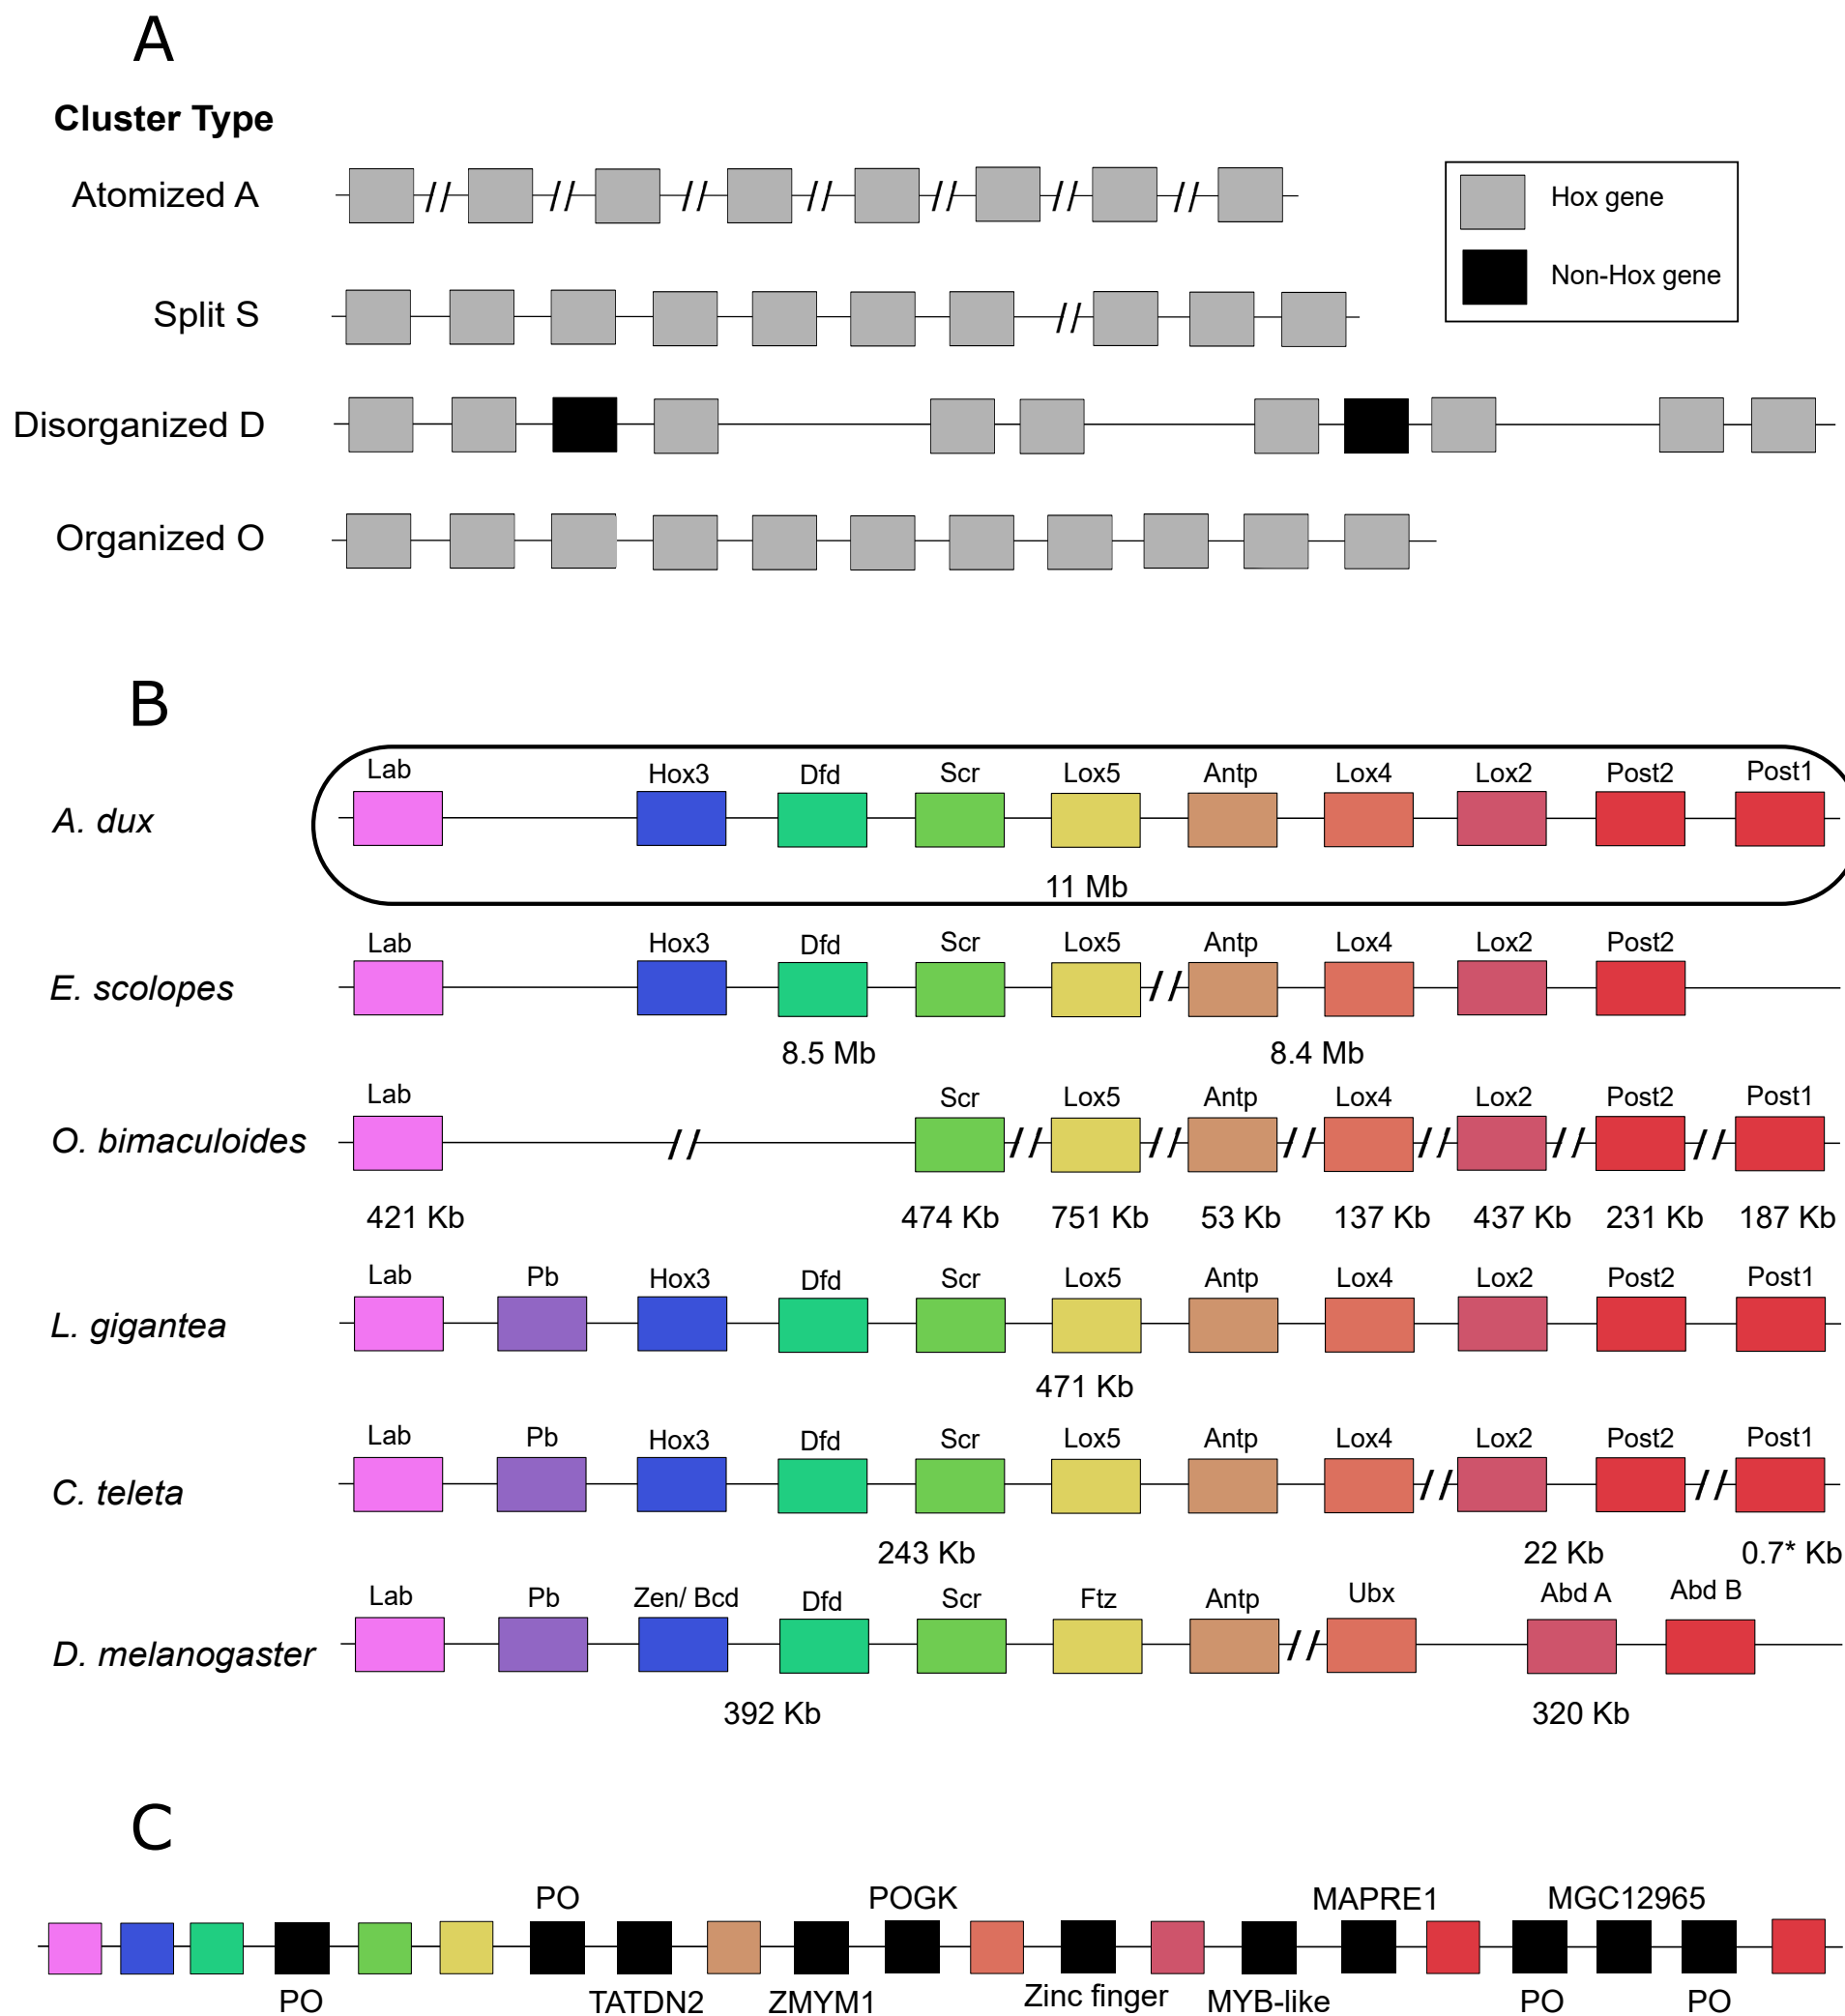



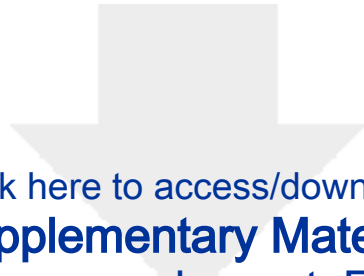

Click here to access/download  
**Supplementary Material**  
RFonseca\_supplement\_RF1.docx

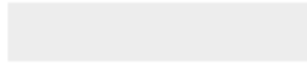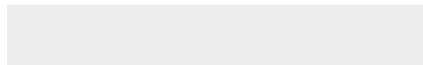

Dear Editor,

We herewith submit our revised manuscript 'A draft genome sequence of the elusive giant squid, *Architeuthis dux*'.

Regarding the points that you have highlighted, please find the answers below:

1) Please clarify the rationale for the unconventional assembly strategy in the revised manuscript. If this has "historic" rather than scientific reasons, the reviewer feels this may be fine, but I agree that the reasons should be discussed in the manuscript, for the benefit of readers who are looking for best practice examples.

The reviewer is correct that there is some degree of history involved. We initially did the assembly without PacBio, and did the presented analyses on this. Later we were offered the chance to try and improve it with PacBio, which we did, but as you can see there was minimal improvement in the assembly statistics (Table 1 and Table S2), but i) an increase of the total genome size to 3.155 Gb, beyond the expected 2.7 Gb estimated in kmergenie, and ii) a slight decrease in the BUSCO completeness assessment. As such, we elected to retain the results based on the original assembly (based on Dovetail), but given that we assume others may wish to use the alternative assembly and explore the differences, we provide both.

In the beginning of the "Data analyses" section, we now clearly state which assembly was used in the comparative genomics analyses (from Line 297) and provide an explanation for that choice.

2) Please expand on the methods for protein-coding gene modelling and have another look at your data whether 50K genes may be an overestimate. I also agree with the reviewer's recommendation to analyze gene models in BUSCO to give readers a better idea of their completeness.

We now expanded the section detailing the filtering of the protein-coding gene set and present a total of 33,406 gene annotations in the final set, as these have validation by matching to cephalopod transcripts and/or SwissProt/UniRef90 proteins. We also provide the results from BUSCO when using the gene models as input for comparison (added to Table 1).

Answers to the reviewer's comments:

Reviewer #1: In this study, de Fonseca et al. report the genome of the giant squid as a resource to investigate the unique traits of this fascinating organism. Two assemblies, which are of comparable contiguity to most other recently published molluscan genomes, as well as a set of over 51,000 gene models are reported. Analysis of the genome focuses on repetitive elements (e.g., TEs), non-coding RNAs, and gene families of interest to the authors (WNT genes, Protocadherins, Hox genes, and reflectins). Overall this is a straightforward study that provides a resource that will be broadly useful and I feel it should be published. However, I have a number of suggestions for improvement including a few

important issues that need to be addressed.

Major points:

1.1. It is unclear why two different genome assemblies are presented instead of just one most optimal assembly. This is not the way I would have gone about assembling this combination of data but presumably Dovetail scaffolding and gene modelling were performed before PacBio sequencing and scaffolding? Re-doing the assembly would a more logical way would probably have relatively little improvement but a little more explanation of the rationale or 'historical' reasons for two different assemblies and/or this assembly strategy would be a helpful addition to readers looking in the literature for examples on best practices for genome assembly.

Thank you for this comment. The reviewer is correct that there is some degree of history involved. We initially did the assembly without PacBio, and did the presented analyses on this. Later we were offered the chance to try and improve it with PacBio, which we did, but as you can see there was minimal improvement in the assembly statistics (Table 1 and Table S2), but i) an increase of the total genome size to 3.155 Gb, beyond the expected 2.7 Gb estimated in kmergenie, and ii) a slight decrease in the BUSCO completeness assessment. As such, we elected to retain the results based on the Dovetail assembly, but given that we assume others may wish to use the alternative assembly and explore the differences, we provide both.

1.2. Related to this issue, there is little comparison of the two genome assemblies and it is unclear which assembly was used for what analyses and even Table 1 and Table S2's titles are a bit ambiguous with respect to which assembly statistics are presented. Please explicitly state which assembly was used for which analyses.

In the beginning of the "Data analyses" section, we now clearly state which assembly was used in the comparative genomics analyses (from Line 297) and provide an explanation for that choice. Additionally, we also mention the choice in the Methods section (Lines 183 to 185) before describing the strategies for annotation and comparative analyses.

1.3. The approach used for gene annotation is unconventional and the inferred number of protein-coding gene models is very high. This does not mean the gene model set is bad, but I feel that data needed for the reader to assess the quality of the gene models are lacking. Please run BUSCO on the gene models and report these data as well.

We now also provide the results from BUSCO when using the gene models as input for comparison.

1.4. Specimen collection data are not reported in the manuscript.

This information has now been added to Table S1.

Minor points:

1.5. Scientific names of species need to be italicized throughout.

Done.

1.6. Did all the giant squid DNA come from the same individual?

Yes, this is now clear in Line 172.

1.7. Lines 140-141: "currently increasing locally" is a bit awkward and vague.

Replace by "in some regions".

1.8. Line 176: Which reads? All Illumina reads? PE reads only?

This has now been clarified on Line 176.

1.9. Line 185: Again, this seems to me to be a strange assembly strategy and I think that it should be clearly stated that PacBio data became available 'late in the game' if that is the case. Otherwise, the logic behind this assembly strategy needs to be explained.

In the beginning of the "Data analyses" section, we now clearly state which assembly was used in the comparative genomics analyses (from Line 297) and provide an explanation for that choice.

1.10. Line 199: High-throughput is misspelled.

Done.

1.11. Line 203: Clarify what is meant by reference transcriptome. All reads from all tissues were pooled and assembled together?

This has now been clarified in Lines 203-204.

1.12. Line 205: "EvidencialGene" is a typo.

Corrected.

1.13. Lines 261-262: Please provide details on exactly what was done in this study in the supplementary material. Description of how the final gene models were selected is vague.

We now further discuss the filters applied in lines 272-275. The total number of protein-coding genes passing all the filters is 33,406.

1.14. Line 277: What is meant by a "bespoke pipeline"? Custom scripts should be made available.

No custom analysis scripts were developed. We simply use 'bespoke' to mean 'tailored to our particular purpose'. Here this refers an analysis pipeline combining: a preliminary analysis using RepeatMasker, followed by a *de novo* analysis using RepeatModeler and a referenced and publicly available script by Platt et al, followed by a full annotation using RepeatMasker. These steps are fully outlined and referenced in the methods section. We have simplified the sentence which now reads:

“Repetitive elements were first identified using RepeatMasker v.4.0.8”

1.15. Line 450: Correct "Sampling was following"

Done.

1.16. BUSCO results are presented in the methods section (should be in the results by the way) for the pre-PacBio scaffolding genome but not the post-PacBio scaffolding genome.

The results of BUSCO for post-PacBio step are presented in Table S2 (as indicated in Line 186). We moved the description of the BUSCO results to the “Data analyses” section and added a clarification regarding the choice of the assembly for the overall comparative genomics analyses (from Line 297).

1.17. Table 1: BUSCO should be in all capital letters.

Done.

1.18. Figure 3: What does the note "Gene size only" mean?

This gene was reported to be fully isolated from other Hox genes in a different scaffold but was not alone in the scaffold. There were other non-Hox genes. Figure 3 aims to show both the organisation and the range occupied by Hox genes. Considering the organisation, the gene is isolated such as in *O. bimaculoides*. Regarding the size, the schematic representation indicates only the Hox “cluster” area. In *O. bimaculoides*, the scaffolds contain only the Hox genes. This means it could be possible for the cluster to be there but only when considering a very vast distance. In this scenario for *C. teleta*, the gene is found in the middle of the scaffold, surrounded by other genes. It is not part of the cluster. Indicating the full scaffold size could lead to a wrong interpretation of the gene size and of the Hox gene range. As such, only the gene size is indicated.

1.19. Table S1: Please provide total number of reads and somewhere it should be clarified how many different instrument runs were conducted and if different libraries were multiplexed on the Illumina platform.

This information has now been added to Table S1.

Reviewer #2: The authors present the genome of the giant squid *Architeuthis dux*. Several cephalopod genomes have been sequenced, but our genomic understanding of cephalopods living in the deep-sea environment is still poor. The authors sequenced a giant squid species *A. dux* together with several transcriptomes from the gonad, liver and brain tissues derived from three other squid species including *Onychoteuthis banksii*, *Dosidicus gigas*, and *Sthenoteuthis oualaniensis*.

Having a giant squid genome is an important contribution to the field of cephalopod genomics, especially for further meaningful comparative genomics. The authors provide a decent genome assembly. And the observation of a non-tightly physically linked Hox cluster is interesting. The manuscript is well written in general, however, there are a lot of editing errors throughout the whole

manuscript, which distracts the reading. The authors need to carefully fix all these typos and errors during the revision. Further comments are provided below.

#### Major comments:

2.1. In the Abstract/Findings, there is a lot of information about "Methods" (e.g. how many raw reads, sequencing of proteome and RNA) instead of what the authors found from the genome itself. Also, the statement "RNA from three different tissue types from three other species of squid to assist genome annotation." is very vague. What tissue types from what species should be clearly described. The authors need to rewrite this section.

In the abstract we followed the format that is usual in a data note, providing detailed information on the data provided by this work. We have now added the names of the three species of squid to the abstract.

2.2. Line 153: Body patterning system? Usage of body patterning is confusing here since body patterning often refers to the developmental process during embryogenesis but not the skin color pattern.

We have rephrased the sentence to: "Cephalopods can rapidly alter the texture, pattern, colour and brightness of their skin, and this both enables a complex communication system, as well as provides exceptional camouflage and mimicry."

2.3. The authors cited that there is a global proliferation of cephalopods (Lines 140 and 141) but later cited other studies saying that there is a regional extinction. It is a bit confusing whether cephalopods are undergoing proliferation or extinction. Given that the earlier citation is more recent (Doubleday et al., 2016) than others, it is wondering which condition is closer to the current situation.

We have removed the second statement to avoid confusion.

2.4. Although it is agreeable in general to have genome resources from unexplored species, the authors' argument in the last paragraph of Data description/Context is not convincing. The link between having a genome and aiding conservation efforts as well as ensuring continued existence is not clear.

Without a genome, population genomic studies that provide information regarding the genetic diversity and structure of populations becomes very challenging, with genome-wide data having to be produced from reduced-representation methods that have many biases. In this last paragraph, we state this specifically: "A genome is an important resource for future population genomics studies[...]"

2.5. Do the authors have any idea why the genome contains so many protein-coding genes (51,225 genes predicted) in comparing to other cephalopod species usually having only 20,000-30,000 genes? For example, is it due to that *A. dux* has more lineage-specific genes or expansions of certain gene families?

We have revised our gene models and now further discuss the filters applied in lines 272-275. The total number of protein-coding genes passing all the filters is 33,406.

2.6. Given that genome size and polyploidy of the organisms are often correlated to increased body size (Session et al., 2016), have the authors checked if there is whole-genome duplication or polyploidy in the *A. dux* genome? Session et al. (2016) Genome evolution in the allotetraploid frog *Xenopus laevis*. Nature 538, 336-343.

We did confirm that the genome was not polyploid by testing for Hardy–Weinberg equilibrium using re-sequencing data from 32 giant squid individuals (Winkelman et al, unpublished results) and there is no evidence for an ancient duplication since we only found one intact Hox complement.

2.7. Figure 3: The authors should provide scaffold numbers for the Hox clusters from each species. Also, in most cases, Hox genes in the Hox cluster are adjacent to each other without the insertion of other non-Hox genes. If there is a special case in *A. dux* and *E. scolopes*, the authors should show the real gene arrangement on that scaffold, especially for the non-Hox genes (with brief annotation) that are in between Hox genes. This can be achieved by having an additional panel in the same figure. The authors are encouraged to show an illustration on the types of Hox gene organization in order to give the readers a better understanding of this context.

Figure 3 has received new panels. Scaffold information for *A. dux* was added in panel C (Figure 3-C). As the assemblies of the other species were retrieved from other studies, the readers are directed to the appropriate references for further detail. An extra panel depicting the Hox cluster organisation in more detail has been added. *E. scolopes* data is shown as reported in its published study. No non-Hox genes were indicated for the area covered in this representation. An additional panel with a simplified version of the various Hox "cluster" types was inserted in panel A (Figure 3-A).

Minor comments:

2.1.1. Line 149: ~2cm -> "~2 cm"

Done.

2.1.2. Line 150: 3 orders -> "three orders"

Done.

2.1.3. Line 150: *Architeuthis dux* -> "*A. dux*"

Done.

2.1.4. Lines 150 and 151: 10-12cm... 20m -> "10-12 cm... 20 m"

Done.

2.1.5. Line 152: 500kg -> "500 kg"

Done.

2.1.6. Line 171: a *Architeuthis dux* sample -> "an *A. dux* sample"

Done.

2.1.7. Line 172: What is CTAB?

CTAB = "cetyl trimethylammonium bromide"; this description has been included in the text (Line 172)

2.1.8. Line 184: For Eukaryota and Metazoa we identified... -> "For Eukaryota and Metazoa, we identified..."

Done.

2.1.9. Line 184: ... 90.4 % and 92.1 %... -> "... 90.4% and 92.1%..."

Done.

2.1.10. Line 185: 23.38Gb -> "23.38 Gb"

Done.

2.1.11. Line 186: 14.79kb -> "14.79 kb"

Done.

2.1.12. "k-mer" (Line 204) or "kmer" (Line 176) to be consistent.

Chose to use "kmer".

2.1.13. Line 216: 100,000 g -> "100,000×g"

Done.

2.1.14. Lines 219 and 222: SDS-PAGE -> "SDS-PAGE" (hyphen but not en dash)

Done.

2.1.15. Line 221: Tris - HCl -> Tris-HCl (single hyphen but not en dash with spaces)

Done.

2.1.16. Line 226: LC-MS/MS analyses -> "LC-MS/MS analyses" (hyphen but not en dash)

Done.



2.1.17. Line 254: Using italic for scientific names (i.e. *Octopus bimaculatus*, *Crassostrea gigas*, and *Lottia gigantea*)

Done.

2.1.18. Line 260: ... 200kb (total length 199Mb)... -> "... 200 kb (total length 199 Mb)..."

Done.

2.1.19. Line 290: Transposable elements -> "transposable elements"

Done.

2.1.20. Line 300: *Architeuthis dux* -> "A. dux"

Done.

2.1.21. Line 323: ~5-8% -> "~5--8%" (en dash but not hyphen for a range)

Done.

2.1.22. Line 381: *Octopus bimaculoides* -> "O. bimaculoides"

Done.

2.1.23. Line 383: *Euprymna scolopes* -> "E. scolopes" (in italic)

Done.

2.1.24. Line 395: *Euprymna scolopes* -> "E. scolopes"

Done.

2.1.25. Lines 397 & 398: 500 - 10,000 kb -> "500-10,000 kb" (en dash but not hyphen for a range)

Done.

2.1.26. Line 406: ... observed in Hox 1, Hox 4, ANTP, Lox 2, Lox 5, Post 1 and Post 2. Hox 1 did,... -> "... observed in Hox1, Hox4, ANTP, Lox2, Lox5, Post1 and Post2. Hox1 did,..."

Done.

2.1.27. Line 407: Hox 1 -> "Hox1"

Done.

2.1.28. Line 408: Hox 3 -> "Hox3"

Done.

2.1.29. Line 409: Lox 4 -> "Lox4"

Done.

2.1.30. Lines 410, 412 & 413: Hox 2 -> "Hox2"

Done.

2.1.31. Line 421: ... contains 7 reflectin genes and 3 reflectin-like genes... -> "... contains seven reflectin genes and three reflectin-like genes..."

Done.

2.1.32. Line 422: ... exception of 1 reflectin gene, ... -> "... exception of one reflectin gene, ..."

Done.

2.1.33. Line 436: ... (tsa)... -> "... (TSA)..."

Done.

2.1.34. Lines 647 & 657: Architeuthis dux -> "A. dux"

Done.

2.1.35. Line 659: Hox 2 -> "Hox2"

Done.
