# Supplementary material for: A draft genome sequence of the elusive giant squid, Architeuthis dux
Source: Oxford University Press journal article supplement (doi:10.1093/gigascience/giz152), 2020-01-01
Supplement: giz152_giga-d-19-00236_revision_2.pdf [file giz152_giga-d-19-00236_revision_2.pdf]

|                             |                                                                                                                                                                                                                                                                                                                                                                                                                                                                                                                                                                                                                                                                                                                                                                                                                                                                      |                         |
|-----------------------------|----------------------------------------------------------------------------------------------------------------------------------------------------------------------------------------------------------------------------------------------------------------------------------------------------------------------------------------------------------------------------------------------------------------------------------------------------------------------------------------------------------------------------------------------------------------------------------------------------------------------------------------------------------------------------------------------------------------------------------------------------------------------------------------------------------------------------------------------------------------------|-------------------------|
| <b>Manuscript Number:</b>   | GIGA-D-19-00236R2                                                                                                                                                                                                                                                                                                                                                                                                                                                                                                                                                                                                                                                                                                                                                                                                                                                    |                         |
| <b>Full Title:</b>          | A draft genome sequence of the elusive giant squid, <i>Architeuthis dux</i>                                                                                                                                                                                                                                                                                                                                                                                                                                                                                                                                                                                                                                                                                                                                                                                          |                         |
| <b>Article Type:</b>        | Data Note                                                                                                                                                                                                                                                                                                                                                                                                                                                                                                                                                                                                                                                                                                                                                                                                                                                            |                         |
| <b>Funding Information:</b> | Villum Fonden (VKR023446)                                                                                                                                                                                                                                                                                                                                                                                                                                                                                                                                                                                                                                                                                                                                                                                                                                            | Dr Rute R. da Fonseca   |
|                             | FP7 People: Marie-Curie Actions (272927)                                                                                                                                                                                                                                                                                                                                                                                                                                                                                                                                                                                                                                                                                                                                                                                                                             | Dr Rute R. da Fonseca   |
|                             | Fundação para a Ciência e a Tecnologia (PTDC/MAR/115347/2009)                                                                                                                                                                                                                                                                                                                                                                                                                                                                                                                                                                                                                                                                                                                                                                                                        | Dr Rute R. da Fonseca   |
|                             | Danmarks Grundforskningsfond (DNRF96)                                                                                                                                                                                                                                                                                                                                                                                                                                                                                                                                                                                                                                                                                                                                                                                                                                | Dr Rute R. da Fonseca   |
|                             | Programa Operacional Temático Factores de Competitividade (PT) (COMPETE-FCOMP-01-012)                                                                                                                                                                                                                                                                                                                                                                                                                                                                                                                                                                                                                                                                                                                                                                                | Dr Rute R. da Fonseca   |
|                             | Rede Nacional de Espectrometria de Massa (ROTEIRO/0028/2013)                                                                                                                                                                                                                                                                                                                                                                                                                                                                                                                                                                                                                                                                                                                                                                                                         | Dr Hugo Osório          |
|                             | Fundação para a Ciência e a Tecnologia (UID/Multi/04423/2019)                                                                                                                                                                                                                                                                                                                                                                                                                                                                                                                                                                                                                                                                                                                                                                                                        | Dr Alexandre Campos     |
|                             | Wellcome Trust (WT108749/Z/15/Z)                                                                                                                                                                                                                                                                                                                                                                                                                                                                                                                                                                                                                                                                                                                                                                                                                                     | Dr Mateus Patricio      |
|                             | Danmarks Grundforskningsfond (DNRF94)                                                                                                                                                                                                                                                                                                                                                                                                                                                                                                                                                                                                                                                                                                                                                                                                                                | Dr M. Thomas P. Gilbert |
|                             | Lundbeckfonden (R52-5062)                                                                                                                                                                                                                                                                                                                                                                                                                                                                                                                                                                                                                                                                                                                                                                                                                                            | Dr M. Thomas P. Gilbert |
|                             | Novo Nordisk Fonden (NNF14CC0001)                                                                                                                                                                                                                                                                                                                                                                                                                                                                                                                                                                                                                                                                                                                                                                                                                                    | Dr Simon Rasmussen      |
|                             | Biotechnology and Biological Sciences Research Council (BB/N020146/1)                                                                                                                                                                                                                                                                                                                                                                                                                                                                                                                                                                                                                                                                                                                                                                                                | Dr Alex Hayward         |
|                             | Biotechnology and Biological Sciences Research Council (BB/M009122/1)                                                                                                                                                                                                                                                                                                                                                                                                                                                                                                                                                                                                                                                                                                                                                                                                | Dr Tobias Baril         |
|                             | Lundbeckfonden (R52-A4895)                                                                                                                                                                                                                                                                                                                                                                                                                                                                                                                                                                                                                                                                                                                                                                                                                                           | Dr Blagoy Blagoev       |
|                             | Nederlandse Organisatie voor Wetenschappelijk Onderzoek (NL) (#825.09.016)                                                                                                                                                                                                                                                                                                                                                                                                                                                                                                                                                                                                                                                                                                                                                                                           | Dr Henk-Jan Hoving      |
|                             | Deutsche Forschungsgemeinschaft (DE) (HO 5569/2-1)                                                                                                                                                                                                                                                                                                                                                                                                                                                                                                                                                                                                                                                                                                                                                                                                                   | Dr Rute R. da Fonseca   |
|                             | Slovak grant agency VEGA (VEGA 1/0684/16)                                                                                                                                                                                                                                                                                                                                                                                                                                                                                                                                                                                                                                                                                                                                                                                                                            | Dr Brona Brejova        |
|                             | Slovak grant agency VEGA (VEGA 1/0458/18)                                                                                                                                                                                                                                                                                                                                                                                                                                                                                                                                                                                                                                                                                                                                                                                                                            | Dr Tomas Vinar          |
| <b>Abstract:</b>            | <p>Background</p> <p>The giant squid (<i>Architeuthis dux</i>; Steenstrup, 1857) is an enigmatic giant mollusk with a circumglobal distribution in the deep ocean, except in the high Arctic and Antarctic waters. The elusiveness of the species makes it difficult to study. Thus, having a genome assembled for this deep-sea dwelling species will allow unlocking several pending evolutionary questions. Findings</p> <p>We present a draft genome assembly that includes 200 Gb of Illumina reads, 4 Gb of Moleculo synthetic long-reads and 108 Gb of Chicago libraries, with a final size matching the estimated genome size of 2.7 Gb, and a scaffold N50 of 4.8 Mb. We also present an alternative assembly including 27 Gb raw reads generated using the Pacific Biosciences platform. In addition, we sequenced the proteome of the same individual</p> |                         |

|                                                      |                                                                                                                                                                                                                                                                                                                                                                                                                                                                                                                                                                                                                          |
|------------------------------------------------------|--------------------------------------------------------------------------------------------------------------------------------------------------------------------------------------------------------------------------------------------------------------------------------------------------------------------------------------------------------------------------------------------------------------------------------------------------------------------------------------------------------------------------------------------------------------------------------------------------------------------------|
|                                                      | <p>and RNA from three different tissue types from three other species of squid species ( <i>Onychoteuthis banksii</i> , <i>Dosidicus gigas</i> , and <i>Sthenoteuthis oualaniensis</i> ) to assist genome annotation. We annotated 33,406 protein coding genes supported by evidence and the genome completeness estimated by BUSCO reached 92%. Repetitive regions cover 49.17% of the genome. Conclusions</p> <p>This annotated draft genome of <i>A. dux</i> provides a critical resource to investigate the unique traits of this species, including its gigantism and key adaptations to deep-sea environments.</p> |
| <b>Corresponding Author:</b>                         | Rute R. da Fonseca<br>University of Copenhagen<br>Copenhagen, DENMARK                                                                                                                                                                                                                                                                                                                                                                                                                                                                                                                                                    |
| <b>Corresponding Author Secondary Information:</b>   |                                                                                                                                                                                                                                                                                                                                                                                                                                                                                                                                                                                                                          |
| <b>Corresponding Author's Institution:</b>           | University of Copenhagen                                                                                                                                                                                                                                                                                                                                                                                                                                                                                                                                                                                                 |
| <b>Corresponding Author's Secondary Institution:</b> |                                                                                                                                                                                                                                                                                                                                                                                                                                                                                                                                                                                                                          |
| <b>First Author:</b>                                 | Rute R. da Fonseca                                                                                                                                                                                                                                                                                                                                                                                                                                                                                                                                                                                                       |
| <b>First Author Secondary Information:</b>           |                                                                                                                                                                                                                                                                                                                                                                                                                                                                                                                                                                                                                          |
| <b>Order of Authors:</b>                             | Rute R. da Fonseca                                                                                                                                                                                                                                                                                                                                                                                                                                                                                                                                                                                                       |
|                                                      | Alvarina Couto                                                                                                                                                                                                                                                                                                                                                                                                                                                                                                                                                                                                           |
|                                                      | Andre Machado                                                                                                                                                                                                                                                                                                                                                                                                                                                                                                                                                                                                            |
|                                                      | Brona Brejova                                                                                                                                                                                                                                                                                                                                                                                                                                                                                                                                                                                                            |
|                                                      | Caroline B. Albertin                                                                                                                                                                                                                                                                                                                                                                                                                                                                                                                                                                                                     |
|                                                      | Filipe Silva                                                                                                                                                                                                                                                                                                                                                                                                                                                                                                                                                                                                             |
|                                                      | Paul Gardner                                                                                                                                                                                                                                                                                                                                                                                                                                                                                                                                                                                                             |
|                                                      | Tobias Baril                                                                                                                                                                                                                                                                                                                                                                                                                                                                                                                                                                                                             |
|                                                      | Alex Hayward                                                                                                                                                                                                                                                                                                                                                                                                                                                                                                                                                                                                             |
|                                                      | Alexandre Campos                                                                                                                                                                                                                                                                                                                                                                                                                                                                                                                                                                                                         |
|                                                      | Angela Ribeiro                                                                                                                                                                                                                                                                                                                                                                                                                                                                                                                                                                                                           |
|                                                      | Inigo Barrio Hernandez                                                                                                                                                                                                                                                                                                                                                                                                                                                                                                                                                                                                   |
|                                                      | Henk-Jan Hoving                                                                                                                                                                                                                                                                                                                                                                                                                                                                                                                                                                                                          |
|                                                      | Ricardo Tafur-Jimenez                                                                                                                                                                                                                                                                                                                                                                                                                                                                                                                                                                                                    |
|                                                      | Chong Chu                                                                                                                                                                                                                                                                                                                                                                                                                                                                                                                                                                                                                |
|                                                      | Barbara Frazão                                                                                                                                                                                                                                                                                                                                                                                                                                                                                                                                                                                                           |
|                                                      | Bent Petersen                                                                                                                                                                                                                                                                                                                                                                                                                                                                                                                                                                                                            |
|                                                      | Fernando Peñaloza                                                                                                                                                                                                                                                                                                                                                                                                                                                                                                                                                                                                        |
|                                                      | Francesco Musacchia                                                                                                                                                                                                                                                                                                                                                                                                                                                                                                                                                                                                      |
|                                                      | Graham C. Alexander Jr.                                                                                                                                                                                                                                                                                                                                                                                                                                                                                                                                                                                                  |
|                                                      | Hugo Osório                                                                                                                                                                                                                                                                                                                                                                                                                                                                                                                                                                                                              |
|                                                      | Inger Winkelmann                                                                                                                                                                                                                                                                                                                                                                                                                                                                                                                                                                                                         |
|                                                      | Oleg Simakov                                                                                                                                                                                                                                                                                                                                                                                                                                                                                                                                                                                                             |
|                                                      | Simon Rasmussen                                                                                                                                                                                                                                                                                                                                                                                                                                                                                                                                                                                                          |
|                                                      | M. Ziaur Rahman                                                                                                                                                                                                                                                                                                                                                                                                                                                                                                                                                                                                          |
|                                                      |                                                                                                                                                                                                                                                                                                                                                                                                                                                                                                                                                                                                                          |

|  |                         |
|--|-------------------------|
|  | Davide Pisani           |
|  | Erich Jarvis            |
|  | Guojie Zhang            |
|  | Jakob Vinther           |
|  | Jan Strugnell           |
|  | L. Filipe C. Castro     |
|  | Olivier Fedrigo         |
|  | Mateus Patricio         |
|  | Qiyue Li                |
|  | Sara Rocha              |
|  | Agostinho Antunes       |
|  | Yufeng Wu               |
|  | Bin Ma                  |
|  | Remo Sanges             |
|  | Tomas Vinar             |
|  | Blagoy Blagoev          |
|  | Thomas Sicheritz-Ponten |
|  | Rasmus Nielsen          |
|  | M. Thomas P. Gilbert    |

|                                                |  |
|------------------------------------------------|--|
| <b>Order of Authors Secondary Information:</b> |  |
|------------------------------------------------|--|

|                               |                                                                                                                                                                                                                                                                                                                                                                                                                                                                                                                                                                                                                                                                                                                                                                                                                                                                                                                                                                                                                                                                                                                                                                                                                                                                                                                                                                                                                                                                                                                                                                                                                                                        |
|-------------------------------|--------------------------------------------------------------------------------------------------------------------------------------------------------------------------------------------------------------------------------------------------------------------------------------------------------------------------------------------------------------------------------------------------------------------------------------------------------------------------------------------------------------------------------------------------------------------------------------------------------------------------------------------------------------------------------------------------------------------------------------------------------------------------------------------------------------------------------------------------------------------------------------------------------------------------------------------------------------------------------------------------------------------------------------------------------------------------------------------------------------------------------------------------------------------------------------------------------------------------------------------------------------------------------------------------------------------------------------------------------------------------------------------------------------------------------------------------------------------------------------------------------------------------------------------------------------------------------------------------------------------------------------------------------|
| <b>Response to Reviewers:</b> | <p>Dear Editor,</p> <p>We herewith submit our revised manuscript 'A draft genome sequence of the elusive giant squid, <i>Architeuthis dux</i>'. We have edited the manuscript to clarify the issues raised by you and Reviewer #2, uploaded the files with the filtered annotations to the GigaScience server and updated the README file accordingly. Please find the answers to all comments below.</p> <p>Best regards,<br/>Rute Fonseca on behalf of all the authors.</p> <p>#####</p> <p>Editor's comments:</p> <p>Reviewer 2 is still concerned regarding the uncertainty of the gene models and says that, ideally, transcriptome data should be used to address this. The reviewer and I are aware that this may not be possible in this species. In this case, I agree with the reviewer that a good way forward would be to provide both, the original and the filtered versions, and discuss the uncertainties around the gene models in the paper.</p> <p>We now make it clearer that transcriptomes of closely related squid species were used to guide the annotation process (since it is impossible to get that type of data from a giant squid). We also provide the two sets of annotations and extended our discussion regarding the gene models in the main text (added information from Lines 252 to 278).</p> <p>#####</p> <p>Reviewer reports:</p> <p>Reviewer #2: The authors have addressed most of my comments. However, I am still cautious about their gene model prediction. Running gene prediction using parameters from other species, especially <i>Drosophila</i> usually gives rise to very inaccurate results.</p> |
|-------------------------------|--------------------------------------------------------------------------------------------------------------------------------------------------------------------------------------------------------------------------------------------------------------------------------------------------------------------------------------------------------------------------------------------------------------------------------------------------------------------------------------------------------------------------------------------------------------------------------------------------------------------------------------------------------------------------------------------------------------------------------------------------------------------------------------------------------------------------------------------------------------------------------------------------------------------------------------------------------------------------------------------------------------------------------------------------------------------------------------------------------------------------------------------------------------------------------------------------------------------------------------------------------------------------------------------------------------------------------------------------------------------------------------------------------------------------------------------------------------------------------------------------------------------------------------------------------------------------------------------------------------------------------------------------------|

The best situation would be using the transcriptome from the same species to train the gene model predictor. I understand there might be a technical limitation, but applying a random filter threshold to reduce the numbers of gene models is also problematic. This filtering may remove lineage-specific genes (i.e., novel genes in this species) and neural peptide genes that are usually very short. If having a good gene model is not possible, I would recommend the authors providing both versions of their gene models (i.e., original and filtered). And the authors should address this weakness in their manuscript.

Please note that the model parameters that were used for the final gene prediction were *A. dux* specific, they were definitely not *D. melanogaster* parameters. *D. melanogaster* parameters were used only as a starting point in the iterative process that has been guided, among other things, by RNA-seqs and proteomes from closely-related oegopsid squid species (unfortunately, we cannot obtain RNA-seq from *A. dux* due to difficulties of obtaining RNA from long-dead specimens). The RNA-seq and proteome information has also been used in the final stage of gene predictions. In this setup, the gene finder can adapt to new species (even species distant from the original parameters) and can give predictions that is in high concordance with related RNA-seq / proteome information where such information is available, while still predicting novel genes in the areas not covered by such evidence.

Methodology of iterative adaptation of gene finding parameters to new species has been previously rigorously evaluated by us (see reference [32] in the paper) as well as others (see e.g. Korf 2004, Lomsadze et al. 2005) and has been confirmed to lead to fast adaptation of the parameters to new species. We have made additional changes to the text describing gene finding to make this more apparent.

As to the high number of gene predictions, we think that this is mostly artefact of low contiguity of the assembly (lots of sequencing gaps) that leads to shorter gene models. (This issue is already discussed in the paper.) You are, of course, correct in pointing out that filtering for "supported" genes may lead to exclusion of truly novel genes. Based on your suggestion, we now provide both original and filtered data sets of gene models.

We base the downstream functional analysis on the filtered gene set, which is done based on sequence similarity to transcriptomes and proteomes of related species (not based on a length cutoff). Note that we are unable to assign putative functional characterization to genes without any additional evidence, since such assignment is done based mostly on sequence similarity. Thus, genes that were filtered out are unlikely to affect downstream analysis in significant ways, yet we agree that they may be a useful resource for other subsequent studies.

Please note the added information within the text extending from line 252 to line 278, which includes the extra references (below for details).

Korf I. Gene finding in novel genomes. BMC bioinformatics. 2004 Dec;5(1):59.

Lomsadze A, Ter-Hovhannisyan V, Chernoff YO, Borodovsky M. Gene identification in novel eukaryotic genomes by self-training algorithm, Nucleic Acids Res. , 2005, vol. 33 (pg. 6494-6496)

Minor comments:

Lines 261-262: "*Drosophila melanogaster*" -> use italic type  
Done.

Line 265: "*A. dux*" -> use italic type  
Done.

Line 266: "*A. dux*" -> use italic type  
Done.

**Additional Information:**

**Question**

**Response**

|                                                                                                                                                                                                                                                                                                                                                                                                                                                                                                                                     |            |
|-------------------------------------------------------------------------------------------------------------------------------------------------------------------------------------------------------------------------------------------------------------------------------------------------------------------------------------------------------------------------------------------------------------------------------------------------------------------------------------------------------------------------------------|------------|
| <p>Are you submitting this manuscript to a special series or article collection?</p>                                                                                                                                                                                                                                                                                                                                                                                                                                                | <p>No</p>  |
| <p><b>Experimental design and statistics</b></p> <p>Full details of the experimental design and statistical methods used should be given in the Methods section, as detailed in our <a href="#">Minimum Standards Reporting Checklist</a>. Information essential to interpreting the data presented should be made available in the figure legends.</p> <p>Have you included all the information requested in your manuscript?</p>                                                                                                  | <p>Yes</p> |
| <p><b>Resources</b></p> <p>A description of all resources used, including antibodies, cell lines, animals and software tools, with enough information to allow them to be uniquely identified, should be included in the Methods section. Authors are strongly encouraged to cite <a href="#">Research Resource Identifiers</a> (RRIDs) for antibodies, model organisms and tools, where possible.</p> <p>Have you included the information requested as detailed in our <a href="#">Minimum Standards Reporting Checklist</a>?</p> | <p>Yes</p> |
| <p><b>Availability of data and materials</b></p> <p>All datasets and code on which the conclusions of the paper rely must be either included in your submission or deposited in <a href="#">publicly available repositories</a> (where available and ethically appropriate), referencing such data using a unique identifier in the references and in the “Availability of Data and Materials” section of your manuscript.</p> <p>Have you have met the above requirement as detailed in our <a href="#">Minimum</a></p>            | <p>Yes</p> |

[Standards Reporting Checklist?](#)

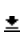

[Click here to view linked References](#)

1 A draft genome sequence of the elusive giant squid, *Architeuthis dux*

2

3 Rute R. da Fonseca<sup>\*1,2</sup>, Alvarina Couto<sup>3</sup>, Andre M. Machado<sup>4</sup>, Brona Brejova<sup>5</sup>, Carolin B. Albertin<sup>6</sup>, Filipe  
4 Silva<sup>4,36</sup>, Paul Gardner<sup>7</sup>, Tobias Baril<sup>8</sup>, Alex Hayward<sup>8</sup>, Alexandre Campos<sup>4</sup>, Ângela M. Ribeiro<sup>4</sup>, Inigo  
5 Barrio-Hernandez<sup>9</sup>, Henk-Jan Hoving<sup>10</sup>, Ricardo Tafur-Jimenez<sup>11</sup>, Chong Chu<sup>12</sup>, Barbara Frazão<sup>4,13</sup>, Bent  
6 Petersen<sup>14,15</sup>, Fernando Peñaloza<sup>16</sup>, Francesco Musacchia<sup>17</sup>, Graham C. Alexander Jr.<sup>18</sup>, Hugo  
7 Osório<sup>19,20,21</sup>, Inger Winkelmann<sup>22</sup>, Oleg Simakov<sup>23</sup>, Simon Rasmussen<sup>24</sup>, M. Ziaur Rahman<sup>25</sup>, Davide  
8 Pisani<sup>26</sup>, Jakob Vinther<sup>26</sup>, Erich Jarvis<sup>27</sup>, Guojie Zhang<sup>30,31,32,33</sup>, Jan M. Strugnell<sup>34,35</sup>, L. Filipe C. Castro<sup>4,36</sup>,  
9 Olivier Fedrigo<sup>28</sup>, Mateus Patricio<sup>29</sup>, Qiye Li<sup>37</sup>, Sara Rocha<sup>3,16</sup>, Agostinho Antunes<sup>4,36</sup>, Yufeng Wu<sup>38</sup>, Bin  
10 Ma<sup>39</sup>, Remo Sanges<sup>40,41</sup>, Tomas Vinar<sup>5</sup>, Blagoy Blagoev<sup>9</sup>, Thomas Sicheritz-Ponten<sup>14,15</sup>, Rasmus  
11 Nielsen<sup>22,42</sup>, M. Thomas P. Gilbert<sup>22,43</sup>

12

13 <sup>1</sup>Center for Macroecology, Evolution and Climate, Natural History Museum of Denmark, University of  
14 Copenhagen, Copenhagen, Denmark.

15 <sup>2</sup>The Bioinformatics Centre, Department of Biology, University of Copenhagen, Copenhagen, Denmark.

16 <sup>3</sup>Department of Biochemistry, Genetics and Immunology, University of Vigo, Vigo, Spain.

17 <sup>4</sup>CIIMAR, Interdisciplinary Centre of Marine and Environmental Research, University of Porto, Porto,  
18 Portugal.

19 <sup>5</sup>Faculty of Mathematics, Physics and Informatics, Comenius University in Bratislava, Bratislava, Slovak  
20 Republic.

21 <sup>6</sup>Department of Organismal Biology and Anatomy, University of Chicago, Chicago, USA.

22 <sup>7</sup>Department of Biochemistry, University of Otago, New Zealand.

23 <sup>8</sup>Centre for Ecology and Conservation, University of Exeter, Penryn Campus, Cornwall, UK.

24 <sup>9</sup>Department of Biochemistry and Molecular Biology, University of Southern Denmark, Odense,  
25 Denmark.

26 <sup>10</sup>GEOMAR Helmholtz Centre for Ocean Research Kiel, Kiel, Germany.

27 <sup>11</sup>Instituto del Mar del Perú.

28 <sup>12</sup>Department of Biomedical Informatics, Harvard Medical School, Boston, USA.

29 <sup>13</sup>IPMA, Fitoplâncton Lab, Lisboa, Portugal.

30 <sup>14</sup>Centre of Excellence for Omics-Driven Computational Biodiscovery (COMBio), Faculty of Applied  
31 Sciences, AIMST University, Kedah, Malaysia.

32 <sup>15</sup>Evolutionary Genomics Section, Globe Institute, University of Copenhagen, Copenhagen, Denmark

33 <sup>16</sup>Biomedical Research Center (CINBIO), University of Vigo, Vigo, Spain

34 <sup>17</sup>Genomic Medicine, Telethon Institute of Genetics and Medicine, Pozzuoli, Naples, Italy

35 <sup>18</sup>GCB Sequencing and Genomic Technologies Shared Resource, Duke University, Durham, NC, USA.

36 <sup>19</sup>i3S-Instituto de Investigação e Inovação em Saúde, Universidade do Porto, Porto, Portugal.

37 <sup>20</sup>IPATIMUP -Institute of Molecular Pathology and Immunology, University of Porto, Porto, Portugal.

38 <sup>21</sup>Faculty of Medicine of the University of Porto, Porto, Portugal.

39 <sup>22</sup>Centre for GeoGenetics, Natural History Museum of Denmark, University of Copenhagen, Copenhagen,  
40 Denmark.

41 <sup>23</sup>Department of Molecular Evolution and Development, University of Vienna, Vienna, Austria.

42 <sup>24</sup>Novo Nordisk Foundation Center for Protein Research, Faculty of Health and Medical Sciences,  
43 University of Copenhagen, Copenhagen, Denmark

44 <sup>25</sup>Bioinformatics Solutions Inc, Waterloo, Ontario, Canada.

45 <sup>26</sup>Departments of Biological sciences and Earth Sciences, University of Bristol, Bristol, UK.  
46 School of Biological Sciences and School of Earth Sciences, University of Bristol, Bristol, UK.

47 <sup>27</sup>The Rockefeller University, New York, USA and Howard Hughes Medical Institute, Maryland, USA.



48 <sup>28</sup>The Rockefeller University, New York, USA

49 <sup>29</sup>European Molecular Biology Laboratory, European Bioinformatics Institute (EMBL-EBI), Wellcome  
50 Genome Campus, Hinxton, UK.

51 <sup>30</sup>Section for Ecology and Evolution, Department of Biology, University of Copenhagen, Copenhagen,  
52 Denmark.

53 <sup>31</sup>China National Genebank, BGI-Shenzhen, Shenzhen, China.

54 <sup>32</sup>State Key Laboratory of Genetic Resources and Evolution, Kunming Institute of Zoology, Chinese  
55 Academy of Sciences, Kunming, China.

56 <sup>33</sup>CAS Center for Excellence in Animal Evolution and Genetics, Chinese Academy of Sciences, Kunming,  
57 China.

58 <sup>34</sup>Centre for Sustainable Tropical Fisheries & Aquaculture, James Cook University, Townsville,  
59 Queensland, Australia

60 <sup>35</sup>Department of Ecology, Environment and Evolution, School of Life Sciences, La Trobe University,  
61 Melbourne, Victoria, Australia

62 <sup>36</sup>Department of Biology, Faculty of Sciences, University of Porto, Portugal.

63 <sup>37</sup>BGI-Shenzhen, Shenzhen, China

64 <sup>38</sup>Department of Computer Science and Engineering, University of Connecticut, Storrs, USA.

65 <sup>39</sup>School of Computer Science, University of Waterloo, Canada.

66 <sup>40</sup>Area of Neuroscience, Scuola Internazionale Superiore di Studi Avanzati (SISSA), Trieste, Italy.

67 <sup>41</sup>Biology and Evolution of Marine Organisms, Stazione Zoologica Anton Dohrn, Napoli, Italy.

68 <sup>42</sup>Departments of Integrative Biology and Statistics, University of California, Berkeley, U.S.A.

69 <sup>43</sup>Norwegian University of Science and Technology, University Museum, Trondheim, Norway

70

71 Email addresses:

72 Rute R da Fonseca: rfonseca@bio.ku.dk (corresponding author)  
73 Alvarina Couto: alvarinacouto@gmail.com  
74 Andre M. Machado: andre.machado@ciimar.up.pt  
75 Brona Brejova: brejova@fmph.uniba.sk  
76 Caroline B. Albertin: calbertin@mbl.edu  
77 Filipe Silva: filipecgilva@gmail.com  
78 Paul Gardner: paul.gardner@otago.ac.nz  
79 Tobias Baril: tb529@exeter.ac.uk  
80 Alex Hayward Hayward: Alex.Hayward@exeter.ac.uk  
81 Alexandre Campos: acampos@ciimar.up.pt  
82 Ângela M. Ribeiro: ribeiro.angela@gmail.com  
83 Inigo Barrio-Hernandez: ibarrioh@ebi.ac.uk  
84 Henk-Jan Hoving: hoving@geomar.de  
85 Ricardo Tafur-Jiménez: rtafur@imarpe.gob.pe  
86 Chong Chu: Chong\_Chu@hms.harvard.edu  
87 Barbara Frazão: bmfrazao@gmail.com  
88 Bent Petersen: bent.petersen@bio.ku.dk  
89 Fernando Peñaloza: fpenaloz@lcg.unam.mx  
90 Francesco Musacchia: f.musacchia@tigem.it  
91 Graham C. Alexander Jr.: gca2@duke.edu  
92 Hugo Osório: hosorio@ipatimup.pt  
93 Inger E. Winkelmann: inger.winkelmann@gmail.com  
94 Oleg Simakov: oleg.simakov@univie.ac.at  
95 Simon Rasmussen: simon.rasmussen@cpr.ku.dk  
96 M. Ziaur Rahman: zrahman@bioinfor.com  
97 Davide Pisani: Davide.Pisani@bristol.ac.uk  
98 Erich D. Jarvis: ejarvis@rockefeller.edu  
99 Guojie Zhang: zhanggjconi@gmail.com  
100 Jakob Vinther: jakob.vinther@bristol.ac.uk  
101 Jan M. Strugnell: jan.strugnell@jcu.edu.au  
102 L. Filipe C. Castro: filipe.castro@ciimar.up.pt  
103 Olivier Fedrigo: ofedrigo@rockefeller.edu  
104 Mateus Patricio: mateus@ebi.ac.uk  
105 Qiye Li: liqiye@genomics.cn  
106 Sara Rocha: sprocha@gmail.com  
107 Agostinho Antunes: aantunes@ciimar.up.pt  
108 Yufeng Wu: ywu@engr.uconn.edu  
109 Bin Ma: binma@uwaterloo.ca  
110 Remo Sanges: remo.sanges@gmail.com  
111 Tomas Vinar: tomas.vinar@fmph.uniba.sk  
112 Blagoy Blagoev: bab@bmb.sdu.dk  
113 Thomas Sicheritz-Ponten: thomassp@bio.ku.dk

114 Rasmus Nielsen: rasmus\_nielsen@berkeley.edu  
115 M. Thomas P. Gilbert: tgilbert@snm.ku.dk  
116

## 117 Abstract

### 118 Background

119 The giant squid (*Architeuthis dux*; Steenstrup, 1857) is an enigmatic giant mollusc with a circumglobal  
120 distribution in the deep ocean, except in the high Arctic and Antarctic waters. The elusiveness of the  
121 species makes it difficult to study. Thus, having a genome assembled for this deep-sea dwelling species  
122 will allow unlocking several pending evolutionary questions.

### 123 Findings

124 We present a draft genome assembly that includes 200 Gb of Illumina reads, 4 Gb of Moleculo synthetic  
125 long-reads and 108 Gb of Chicago libraries, with a final size matching the estimated genome size of 2.7  
126 Gb, and a scaffold N50 of 4.8 Mb. We also present an alternative assembly including 27 Gb raw reads  
127 generated using the Pacific Biosciences platform. In addition, we sequenced the proteome of the same  
128 individual and RNA from three different tissue types from three other species of squid species  
129 (*Onychoteuthis banksii*, *Dosidicus gigas*, and *Sthenoteuthis oualaniensis*) to assist genome annotation.  
130 We annotated 33,406 protein coding genes supported by evidence and the genome completeness  
131 estimated by BUSCO reached 92%. Repetitive regions cover 49.17% of the genome.

### 132 Conclusions

133 This annotated draft genome of *A. dux* provides a critical resource to investigate the unique traits of this  
134 species, including its gigantism and key adaptations to deep-sea environments.

### 135 Keywords

136 Cephalopod, invertebrate, genome assembly.

137

## 138 Data description

### 139 Context

140 Cephalopods are the most behaviourally complex of the invertebrate protostomes [1]. Their large, highly  
141 differentiated brains are comparable in relative size and complexity to those of vertebrates [2], as are  
142 their cognitive capabilities [1]. Cephalopods are distributed worldwide from tropical to polar marine  
143 habitats, from benthic to pelagic zones and from intertidal areas down to the abyssal parts of the deep  
144 sea, with the only exception being the Black Sea. Cephalopod populations are thought to be currently  
145 increasing in some regions for a variety of reasons [3], including potential predator release as a  
146 consequence of the depletion of fish stocks [4]. The class Cephalopoda contains approximately 800  
147 species, with the vast majority belonging to the soft-bodied subclass Coleoidea (cuttlefishes, octopuses  
148 and squids), and a small handful belonging to the Nautiloidea (nautiluses) [5]. Cephalopods are  
149 ecologically important as a primary food source for marine mammals, birds and for many fish species.  
150 They are also increasingly important as a high-protein food source for humans and are a growing target  
151 for commercial fisheries and farming [6].

152 Cephalopods show a wide variety of morphologies, lifestyles and behaviours [7], but with the exception  
153 of the nautiluses they are characterized by having rapid growth and short lifespans, despite a considerable  
154 investment in costly sensory adaptations [2]. They range in size from the tiny pygmy squids (~2 cm) to  
155 animals that are nearly three orders of magnitude larger, such as the giant squid, *A. dux* (average length  
156 10–12 m, and reported up to 20 m total length) [6,8,9], to the colossal squid, *Mesonychoteuthis hamiltoni*  
157 (maximum length remains unclear, but a recorded weight of 500 kg makes it the largest known  
158 invertebrate [10]). Cephalopods can rapidly alter the texture, pattern, colour and brightness of their skin,  
159 and this both enables a complex communication system, as well as provides exceptional camouflage and  
160 mimicry [11]. Together these allow cephalopods to both avoid predators, and hunt prey highly efficiently,  
161 making them some of the top predators in the ocean. The remarkable adaptations of cephalopods also

162 extend to their genome, with recent work demonstrating increased levels of RNA editing to diversify  
163 proteins involved in neural functions [12].  
164 Over recent years, oceanic warming and acidification, pollution, expanding hypoxia and fishing [13–15]  
165 have been shown to affect cephalopod populations. Mercury has been found in high concentrations in  
166 the tissue of giant squid specimens [16], and accumulation of flame retardant chemicals has also been  
167 detected in the tissue of deep-sea cephalopods [17]. Consequently, there is an urgent need for greater  
168 biological understanding of these important, but rarely encountered animals, in order to aid conservation  
169 efforts and ensure their continued existence. A genome is an important resource for future population  
170 genomics studies aiming at characterizing the diversity of the legendary giant squid, the species which has  
171 inspired generations to tell tales of the fabled Kraken.

172

## 173 [Methods](#)

### 174 *DNA extraction, library building, and de novo genome assembly*

175 High-molecular-weight genomic DNA was extracted from a single *A. dux* individual (NCBI taxon id:  
176 256136) using a cetyl trimethylammonium bromide (CTAB) based buffer followed by organic solvent  
177 purification, following Winkelmann et al [18] (details in the Supplementary Information). We generated  
178 116 Gb of raw reads from Illumina short-insert libraries, 76 Gb of paired-end reads from libraries ranging  
179 from 500 bp to 800 bp in insert size, and 5.4 Gb of mate-pair with a 5 kb insert (Table S1). Furthermore,  
180 we generated 3.7 Gb of paired-end reads using Moleculo libraries (3 High-Throughput libraries and 4  
181 High-Fidelity libraries). The kmer distribution of the reads under a diploid model in kmergenie [19]  
182 predicted the genome size to be 2.7 Gb.

183 An initial assembly generated with Meraculous (Meraculous, RRID:SCR\_010700) [20] using Illumina and  
184 Moleculo data (N50 of 32 Kb, assembly statistics in Table S2) was used as input for Dovetail Genomic's  
185 HiRise scaffolding software together with the Hi-C data generated from two Chicago libraries

186 corresponding to a physical coverage of the genome of 52.1X. This “Meraculous + Dovetail” assembly  
187 (statistics in Table 1) was the one used for the genome annotation (non-coding RNAs, protein-coding  
188 genes and repeats) and comparative genomics analyses presented in this paper. Further scaffolding was  
189 done using 23.38 Gb of PacBio reads (19 SMRT cells, average read length is 14.79 kb) using the default  
190 parameters in PBJelly (PBJelly, RRID:SCR\_012091) [21] (see assembly statistics in Table S2). The genome  
191 gene content completeness was evaluated through the Benchmarking Universal Single-Copy Orthologs  
192 (BUSCO, RRID:SCR\_015008) v.3.0.2, datasets: Eukaryota, Metazoan) [22].

### 193 *Transcriptome sequencing and de novo assembly*

194 Given the extreme rarity of live giant squid sightings, we were unable to collect fresh organ samples  
195 (following the recommendations in [23]) containing intact RNA from the species to assist with the  
196 genome annotation. As an alternative, we extracted total RNA from gonad, liver and brain tissue from  
197 live caught specimens of three other oegopsid squid species (*Onychoteuthis banksii*, *Dosidicus gigas*, and  
198 *Sthenoteuthis oualaniensis*; NCBI taxon ids 392296, 346249 and 34553, respectively; Supplementary  
199 Figure S1), using the Qiagen RNeasy extraction kit (Qiagen, CA, USA). The RNA integrity and quantity was  
200 measured on a Qubit fluorometer (Invitrogen, OR, USA) and on the Agilent Bioanalyzer 2100 (Agilent,  
201 CA, USA). The Illumina TruSeq Kit v.2.0 was used to isolate the mRNA and prepare cDNA libraries for  
202 sequencing, following the recommended protocol. Compatible index sequences were assigned to  
203 individual libraries to allow for multiplexing on four lanes of 100bp paired-end technology on an Illumina  
204 HiSeq 2000 flow cell. Sequencing of the cDNA libraries was done at the National High-Throughput  
205 Sequencing Center at the University of Copenhagen in Denmark. We assessed the quality of the raw  
206 reads using FastQC (FastQC, RRID:SCR\_014583) v0.10.0 [24]. After removing indexes and adaptors with  
207 CutAdapt [25], we trimmed the reads with the FASTX-toolkit ([http://hannonlab.cshl.edu/fastx\\_toolkit](http://hannonlab.cshl.edu/fastx_toolkit))  
208 removing bases with a Phred-scale quality score lower than 25. Reference transcriptomes for each  
209 species were built after pooling the reads from all tissues and using these as input in Trinity (Trinity,

210 RRID:SCR\_013048) [26]. This software was used with the default settings including a fixed kmer size of  
211 25 as suggested by the authors. Annotation of coding regions was done with the EvidentialGene pipeline  
212 [27].

213 *Protein extraction, separation by 1D SDS-PAGE, MALDI-TOF/TOF and Protein Identification*

214 Given the practical impossibility of obtaining RNA from a giant squid specimen, we produced a library of  
215 giant squid peptide sequences to guide the gene annotation process.

216 Proteins were solubilised from a giant squid mantle tissue sample according to the procedure described  
217 by Kleffmann et al. [28] and employing the following buffers: (1) 40 mM Tris-HCl, 5 mM MgCl<sub>2</sub> and 1  
218 mM DTT, pH 8.5; (2) 8 M urea, 20 mM Tris, 5 mM MgCl<sub>2</sub> and 20 mM DTT; (3) 7 M urea, 2 M thiourea, 20  
219 mM Tris, 40 mM DTT, 2% CHAPS (w/v) and 1% Triton X-100 (v/v) and (4) 40 mM Tris, 4% SDS (w/v)  
220 and 40 mM DTT. All buffers were augmented with protease inhibitors (Halt™ Protease Inhibitor Cocktail,  
221 EDTA-Free, Thermo Scientific). Tissue samples were ground in liquid nitrogen before homogenization, or  
222 homogenized directly with ultrasound (probe sonication at 60 Hz, for 3 min) in buffer 1. Solubilised  
223 proteins were collected by ultracentrifugation at 100,000xg and 4 °C. Each extraction was performed in  
224 duplicate for each specific buffer and extracts were pooled. Protein extracts were subsequently stored  
225 at -20 °C. Total protein content was estimated according to the Bradford (1976) method [29].

226 Protein separation by 1D SDS-PAGE electrophoresis was carried out as described in Santos et al. [30]. 53  
227 µL of sample (39 µg protein) was diluted in 72 µL of Loading Buffer (0.01% bromophenol blue, 2% SDS  
228 (Sodium-DodecylSulfate), 20% glycerol, 5% β-mercaptoethanol (w/v/v) in 62.5 mM Tris-HCl, pH 6.8). The  
229 resulting solution was heated for 3 min at 99°C. Proteins were separated by SDS-PAGE with 12% (w/v)  
230 polyacrylamide gels. Electrophoresis was carried out using the mini Protean Cell (BioRad) at a constant  
231 voltage of 150 V. The separated proteins were visualized by staining with Colloidal Coomassie Brilliant  
232 Blue (CCB) [31], and lanes were cut into 15 gel sections for subsequent LC-MS/MS analysis.



233 *LC-MS/MS analyses*

234 All samples were analysed with the Easy-nLC system (Thermo Fisher Scientific), connected online to a Q  
235 Exactive mass spectrometer (Thermo Fisher Scientific) equipped with a nanoelectrospray ion source  
236 (Thermo Fisher Scientific). Tryptic peptides were loaded in a fused silica column (75 µm inner diameter)  
237 packed with C18 resin (3-µm beads, Reprosil, Dr. Maisch), with solvent A (0.5% acetic acid). They were  
238 then eluted with a 120 minute gradient of solvent B (80% ACN, 0.5% acetic acid) with a constant flow of  
239 250 nL/min. The Q exactive was operated in positive mode with a capillary temperature of 250 °C, using  
240 the data dependent acquisition method, which switches from full MS scans to MS/MS scans for the 12  
241 most intense ions. Fragmentation was achieved by higher-energy collisional dissociation (HCD) with a  
242 normalized collisional energy (NCE) of 25. Full MS ranged from 300 to 1750 m/z at a resolution of  
243 70,000, an Automatic Gain Control (AGC) of 1e6 and a maximum injection time of 120 ms, whereas  
244 MS/MS events were scanned at a resolution of 35,000, an AGC of 1e5, maximum injection time of 124  
245 ms, isolation windows of 2 m/z and an exclusion window of 45 seconds.

246 *de novo peptide prediction*

247 Raw LC-MS/MS data were read using Thermo Fisher MSRawFileReader 2.2 library and imported into  
248 PEAKS Studio 7.0 and subsequently pre-processed for precursor mass and charge correction, MS/MS de-  
249 isotoping, and deconvolution. PEAKS de novo sequencing [31] was performed on each refined MS/MS  
250 spectrum with a precursor and fragment ion error tolerance of 7 ppm and 0.02 da respectively.  
251 Carbamidomethylation (Cys) was set as a fixed modification and oxidation (Met) and N-terminal  
252 Acetylation as variable modifications. At most, five variable modifications per peptide were allowed. For  
253 each tandem spectrum, five *de novo* candidates were reported along with their Local Confidence Scores  
254 (the likelihood of each amino acid assignment in a *de novo* candidate peptide). This score was used to  
255 determine the accuracy of the *de novo* peptide sequences. The top *de novo* peptide for each spectrum  
256 was determined by the highest Average Local Confidence score (ALC) among the candidates for that  
257 spectrum.

258 *Genome annotation*

259 Protein-coding genes were predicted by ExonHunter [32] , which combines probabilistic models of  
260 sequence features with external evidence from alignments. As external evidence, we have used the  
261 transcriptomes of oegopsid squid species obtained as a part of this project (*O. banksii*, *D. gigas*, and *S.*  
262 *oualaniensis*); these transcripts were translated into proteins in order to facilitate cross-species  
263 comparison. In addition, known proteins from *Octopus bimaculatus*, *Crassostrea gigas* (Pacific oyster)  
264 and *Lottia gigantea* (Giant owl limpet) were used to inform the gene prediction process. The proteins  
265 were aligned to the genome by BLASTX. De-novo identified MS/MS-based peptides were initially also  
266 considered as external evidence but were later omitted due to low coverage. Evidence from predicted  
267 repeat locations was used to discourage the model to predict genes overlapping repeats. Since no  
268 sufficiently close annotated genome was available for training gene finding parameters, ExonHunter was  
269 first run using *Drosophila melanogaster* parameters on a randomly chosen subset of 118 scaffolds longer  
270 than 200kb (total length 199 Mb). Out of 12,912 exons predicted in this run, 5,716 were supported by  
271 protein alignment data and selected to train the parameters of the gene finding model for *A. dux*, using  
272 the methods described in [32]. Such iterative training has been previously shown to yield similar gene  
273 prediction results as training on curated gene sets [32–34] [32,xx,yy]. Rerunning ExonHunter with the  
274 resulting *A. dux* model parameters on the entire genome yielded 51,225 candidate gene predictions  
275 genes. Gene prediction in *A. dux* is challenging due to the fragmentary nature of the genome assembly  
276 (60% of predictions span a sequencing gap). This results in a significant number of artifacts, for example  
277 short genes with long introns spanning gaps in the assembly. 18,054 predictions yield protein product  
278 shorter than 100 amino acids, yet the median span of these predictions is more than 4kb and only 32%  
279 of them are supported by transcript or protein alignments. In contrast, 83% of genes with product  
280 longer than 100aa are supported. Another factor contributing negatively to gene prediction quality is  
281 the lack of RNA-seq data from *A. dux* due to unavailability of fresh organ samples. In most of the  
282 analyses below, we consider only 33,406 genes that were found to have transcript evidence (blastp

283 match to a sequence from a cephalopod transcriptome, with at least 50% of the giant squid coding  
284 region covered) and/or matches in Swissprot or UniRef90 databases (Table 1). This supported set  
285 contains much fewer extremely short genes (Figure S4).

286 The function of the protein-coding genes was inferred with Annocript 0.2 [35], which is based on the  
287 results from blastp [36] runs against the SwissProt (SP) and UniRef90 (Uf). In addition, we performed a  
288 rpsblast search using matrices from the conserved domain database (CDD) to annotate specific domains  
289 present on the protein queries.

290 Non-coding RNAs were annotated using the cmsearch program from INFERNAL 1.1 (INFERNAL,  
291 RRID:SCR\_011809) and the covariance models (CMs) from the Rfam database v12.0 [37,38]. All  
292 matches above the curated GA threshold were included. INFERNAL was selected because it implements  
293 the CMs that provide the most accurate bioinformatic annotation tool for ncRNAs available [39]. tRNA-  
294 scan v.1.3.1 was subsequently used to refine the annotation of tRNA genes (Table S3). The method uses  
295 a number of heuristics to increase the search-speed, annotates the Isoacceptor Type of each prediction,  
296 infers if predictions are likely to be functional or tRNA-derived pseudogenes [40,41]. This method uses  
297 CMs to identify tRNAs. Rfam matches and the tRNA-scan results for families belonging to the same clan  
298 were then “competed”, so that only the best match was retained for any genomic region [38].

#### 299 *Transposable element annotation*

300 Repetitive elements were first identified using RepeatMasker (RepeatMasker, RRID:SCR\_012954) v.4.0.8  
301 [42] with the eukaryota RepBase [43] repeat library. Low-complexity repeats were ignored (-nolow) and  
302 a sensitive (-s) search was performed. Following this, a de novo repeat library was constructed using  
303 RepeatModeler (RepeatModeler, RRID:SCR\_015027) v.1.0.11 [44] , including RECON v.1.08 [45] and  
304 RepeatScout (RepeatScout, RRID:SCR\_014653) v.1.0.5 [46]. Novel repeats identified by RepeatModeler  
305 were analyzed with a ‘BLAST, Extract, Extend’ process to characterise elements along their entire length

306 [47]. Consensus sequences and classification information for each repeat family were generated. The  
307 resulting de novo repeat library was utilized to identify repetitive elements using RepeatMasker.

### 308 *Data analyses*

309 We present a main draft genome assembly produced using 200 Gb of Illumina reads, 4 Gb of Molecu-  
310 lo synthetic long-reads and 108 Gb of Chicago libraries, with a final size matching the estimated genome  
311 size of 2.7 Gb, and a scaffold N50 of 4.8 Mb (assembly and annotation statistics in Table 1). Genome  
312 completeness estimated by BUSCO reached 90.4% (Eukaryota) and 92.1% (Metazoa), and the  
313 completeness for the 33,406 protein-coding genes was 91.2% (Eukaryota) and 84.0 (Metazoa).

314 We also produced an alternative assembly including 27 Gb raw reads generated using the Pacific  
315 Biosciences platform, but this showed minimal improvement in assembly statistics, genome size larger  
316 than the predicted and lower BUSCO completeness (Table S2).

### 317 *Comparative analyses of transposable elements*

318 We estimated the total repeat content of the giant squid genome to be approximately half its total size  
319 (~49.1%) (Figure 1, Supplementary Table S4). Out of all the repeats present in the giant squid genome,  
320 only a few were predicted to be small RNAs, satellites, simple or low complexity repeats (~0.89% of the  
321 total genome), with the vast majority (~48.21%) instead consisting of transposable elements (TEs; i.e.  
322 SINEs, LINEs, LTR retrotransposons, and DNA transposons; Figure 1, Supplementary Table S4). Of the TE  
323 portion of the giant squid genome, the main contribution from annotated TEs is from DNA elements  
324 (11.06%) and LINEs (6.96%), with only a small contribution from SINEs (1.99%) and LTR elements  
325 (0.72%). TEs are a nearly universal feature of eukaryotic genomes, often comprising a large proportion  
326 of the total genomic DNA (e.g. the maize genome is ~85% TEs [48], stick insect genome is ~52% TEs [49],  
327 and the human genome is >45% TEs [50]), consequently these account for the majority of observed  
328 genome size variation among animals.

329 In Figure 1, we summarise the recently reported TE analyses performed on assembled cephalopod

330 genomes, as follows: California two-spot octopus (*Octopus bimaculatus*) [11] and long-arm octopus (*O.*  
331 *minor*) [51], Hawaiian bobtail squid (*Euprymna scolopes*) [52], and giant squid (*A. dux*). The varying  
332 sequencing strategies employed to generate currently available cephalopod genomes (and  
333 accompanying variation in assembly quality) complicates the comparative analysis of TE content for this  
334 group. However, notwithstanding this caveat, it does seem clear that TEs make up a large fraction of the  
335 total genomic content across all cephalopod genomes published to date (Figure 1). DNA transposons  
336 and LINEs dominate in available cephalopod genomes, while LTR elements and SINEs generally  
337 represent a minor portion of cephalopod TEs (Figure 1). Within decapod cephalopods (i.e. squid and  
338 cuttlefish), patterns in TE content are generally similar, however, the giant squid has a notably larger  
339 proportion of DNA transposons (1,626,482 elements, 11.06% of the total genome) than the Hawaiian  
340 bobtail squid (855,308 elements, 4.05% of the total genome), with the bobtail squid in turn having a  
341 similar proportion of LINEs (752,629 elements, 6.83% of the total genome) than the giant squid (766,382  
342 elements, 6.96% of the total genome; Figure 1).

343 The defining ability of TEs to mobilise, in other words, to transfer copies of themselves into other parts  
344 of the genome, can result in harmful mutations. However, TEs can also facilitate the generation of  
345 genomic novelty, and there is increasing evidence of their importance for the evolution of host-adaptive  
346 processes [53]. In the giant squid genome, all classes of TEs were more frequent (~38.23) in intergenic  
347 regions (here defined as regions >2kb upstream or downstream of an annotated gene), than in genic  
348 regions versus % of the genome in intergenic regions (~16.6%; Figure 2A). These findings are broadly  
349 similar to those reported for other cephalopods, although a larger proportion of the giant squid genome  
350 is composed of repeats located within genic regions (percentage of the genome represented by TEs for  
351 *O. bimaculoides*: ~6% genic versus ~30% intergenic, and for *O. minor* ~6% genic versus ~40% intergenic  
352 [51]).

353 A Kimura distance-based copy divergence analysis revealed that the most frequent TE sequence  
354 divergence relative to the TE consensus sequence in the giant squid genome was ~5–8% across all  
355 repeat classes, suggesting a relatively recent transposition burst across all major TE types (Figure 2B).  
356 Divergence peaks were most pronounced in LINE RTE elements, Tc/Mar and hAT DNA transposons, and  
357 unclassified TEs, with smaller divergence peaks in SINE tRNA elements and Penelope LINE elements  
358 (Figure 2B). Divergence peaks were most pronounced in LINE RTE elements, Tc/Mar and hAT DNA  
359 transposons, and unclassified TEs, with smaller divergence peaks in SINE tRNA elements and Penelope  
360 LINE elements (Figure 2B). In comparison to observations from other cephalopods, these results suggest  
361 a shorter and more intense burst of recent TE activity in the giant squid genome. Overall, further  
362 genomic sampling within each of the cephalopod clades will be needed to understand TE evolution, as  
363 closely related species can show significant differences (*e.g.*, *O. bimaculoides* to *O. vulgaris*) [54].

#### 364 *Non-coding RNAs*

365 We identified 50,598 ncRNA associated loci in the squid sequencing data, using curated homology-based  
366 probabilistic models from the Rfam database [55] and the specialized tRNAscan-SE (tRNAscan-SE,  
367 RRID:SCR\_010835) transfer RNA annotation tool [40]. The essential and well conserved Metazoan  
368 ncRNAs: tRNAs, rRNAs (5S, 5.8S, SSU and LSU), RNase P, RNase MRP, SRP and the major spliceosomal  
369 snRNAs (U1, U2, U4, U5, U6), as well as the minor spliceosomal snRNAs (U11, U12, U4atac & U6atac),  
370 are all found in the *A. dux* genome. Some of the copy numbers associated with the core ncRNAs are  
371 extreme. For example, we identified: i) approximately 24,000 loci that appear to derive from 5S rRNA; ii)  
372 approximately 17,000 loci that are predicted to be tRNA derived; iii) approximately 3,200 Valine tRNAs  
373 isotypes and approximately 1,300 U2 spliceosomal RNAs. The microRNA mir-598 also exhibits high copy-  
374 numbers at 172. Many of these are likely to be SINEs derived by transposition. All 20 tRNA isotypes were  
375 identified in *A. dux* genome. Again, many of these had relatively large copy numbers (summarised in  
376 Table 1). These ranged from 46 (Cys) up to 2,541 (Val). We identified 174 loci that share homology with

377 34 known snoRNA families, these included 15 scaRNA, 41 H/ACA box and 118 C/D box snoRNA  
378 associated loci [10]. The snoRNAs are predominantly involved in rRNA maturation. We identified 7,049  
379 loci that share homology with 283 families of microRNA. Some of these may be of limited reliability, as  
380 CMs for simple hairpin structures can also match other, non-homologous, hairpin-like structures in the  
381 genome e.g. inverted repeats. A number of cis-regulatory elements were also identified. These included  
382 235 hammerhead 1 ribozymes, 133 Histone 30 UTR stem-loops, and 14 Potassium channel RNA editing  
383 signal sequences. There are very few matches to obvious non-metazoan RNA families in the current  
384 assemblies. The only notable exceptions are bablM, IMES-2, PhotoRC-II and rspL. Each of these families  
385 are also found in marine metagenomic datasets, possibly explaining their presence as “contamination”  
386 from the environment.

387

#### 388 *Analyses of specific gene families*

389 Several gene families involved in development, such as transcription factors or signaling ligands, are  
390 highly conserved across metazoans and may therefore reveal signatures of genomic events, such as a  
391 whole genome duplication.

392 WNT is a family of secreted lipid-modified signaling glycoproteins with a key role during development  
393 [56]. Comparative analysis of molluscan genomes indicates that the ancestral state was 12 *WNT* genes,  
394 as *Wnt3* is absent in all protostomes examined thus far [57]. The giant squid has the typical 12  
395 lophotrochozoan WNTs (1, 2, 4, A, 5, 6, 7, 8, 9, 10, 11 and 16; Supplementary Figure S2), and therefore  
396 has retained the ancestral molluscan complement, including *Wnt8*, which is absent, for instance, in the  
397 genome of the slipper snail *Lottia gigantea* [58].

398 Protocadherins are a family of cell adhesion molecules that appear to play an important role in  
399 vertebrate brain development [59]. It is thought that they act as multimers at the cell surface in a  
400 manner akin to DSCAM in flies, which lack protocadherins [60]. Cephalopods have massively expanded

401 this family, with 168 identified in the *O. bimaculoides* genome, whereas only 17-25 protocadherins have  
402 been identified in the genomes of annelids and non-cephalopod molluscs [11]. We identified  
403 approximately 135 protocadherin genes in *A. dux*, many of which are located in clusters in the genome.  
404 The possibility that this gene family plays a developmental role parallel to that of protocadherins in  
405 vertebrate neurodevelopment thus remains a compelling hypothesis.

406 Development organisation of the highly diverse body plans found in the Metazoa is controlled by a  
407 conserved cluster of homeotic genes, which includes, among others, the Hox genes. These are  
408 characterized by a DNA sequence referred to as the homeobox, comprising 180 nucleotides that encode  
409 the homeodomain [61]. Hox genes are usually found in tight physical clusters in the genome and are  
410 sequentially expressed in the same chronological order as they are physically located in the DNA  
411 (temporal and spatial collinearity) [62]. Different combinations of Hox gene expression in the same  
412 tissue type can lead to a wide variety of different structures [63]. This makes the Hox genes a key subject  
413 for understanding the origins of the multitude of forms found in the cephalopods. In *O. bimaculoides*  
414 genome assembly no scaffold contained more than a single Hox gene, meaning that they are fully  
415 atomised [11]. However, in *E. scolopes*, the Hox cluster was found spanning two scaffolds [52]. In the  
416 giant squid, we recovered a full Hox gene cluster in a single scaffold (Figure 3-B). The Hox gene  
417 organization found in the giant squid genome suggests either the presence of a disorganised cluster, so-  
418 called type D, or atomised clusters, type A [63], or possibly a combination of the two (the genes are still  
419 organized, but physically distant from each other). The existence of a "true" cluster seems unlikely, given  
420 the presence of other unrelated genes in between and the relatively large distances (Figure 3-C). The  
421 classification as type A (atomised) might seem most obvious, despite the co-presence of the genes in a  
422 single scaffold, due to these large distances. However, the definition of type D (disorganised) does allow  
423 for the presence of non-Hox genes in between members of the cluster (Figure 3-A). Thus, it is difficult to  
424 clearly categorise the recovered "cluster", but it does remain clear that these genes are not as tightly



425 bundled as they are in other Bilateria lineages. The *A. dux* Hox “cluster” is spread across 11 Mb of a 38  
426 Mb scaffold, and this suggests a far larger size range in the cephalopods than in other described animals,  
427 as recently suggested based on the genome of *E. scolopes* [52]. It is possible that this is the reason for  
428 the apparent atomisation of Hox genes in the more fragmented *O. bimaculoides* assembly. Hox clusters  
429 are usually found in contigs of around 100 kb length in vertebrates [6, 7] and between 500 – 10,000 kb  
430 in invertebrates [8] An assembled contig easily containing the complete cluster for these smaller cluster  
431 sizes, would manage to cover only one member of the Hox gene cluster in the studied coleoids. As such,  
432 our results suggest that the Hox cluster may not be fully atomised in *O. bimaculoides* as previously  
433 hypothesised. Further improvements of genome assemblies in cephalopods will be required to address  
434 this question. The biological reason for this dramatic increase in the distance between the genes in the  
435 Hox cluster presents an intriguing avenue of future research. The homeodomain of all the obtained Hox  
436 genes in cephalopods were compared with those of other mollusks. Few differences were found relative  
437 to a previous study [64], as no significant modifications were observed in Hox1, Hox4, ANTP, Lox2, Lox5,  
438 Post1 and Post2. Hox1 did, however, show reduced conservation in residues 22 to 25 in the *A. dux*  
439 sequence. This observation for Hox1 in *A. dux* is visible only in the Pacbio assembly. Additionally, the  
440 Hox3 homeodomain analysis supports a basal placement of the nautiloids within cephalopods. The Lox4  
441 gene was the most variable among all groups. As of to date, Hox2 still remains undetected in the coleoid  
442 cephalopods [65]. Assembly errors notwithstanding, gain and loss of Hox genes has been attributed to  
443 fundamental changes in animal body plans, and the apparent loss of Hox2 may therefore be significant.  
444 For example, Hox gene loss has been associated with the reduced body-plan segmentation of spider  
445 mites [42]. The circumstance that Hox2 has been readily found in *Nautilus*, but remains undetected in all  
446 coleoids sequenced thus far, might signify an important developmental split within the Cephalopoda.  
447 Alternatively, and equally intriguing, this Hox gene may have undergone such drastic evolutionary  
448 modifications that it is presently undetectable by conventional means.

449 On a final note, we analyzed genes encoding reflectins, a class of cephalopod-specific proteins first  
450 described in *E. scolopes* [66]. Reflectins form flat structures that reflect ambient light (other marine  
451 animals use purine-based platelets), thus modulating iridescence for communication or camouflage  
452 purposes [67]. The giant squid genome contains seven reflectin genes and three reflectin-like genes  
453 (Supplementary Figure S3). All of these genes, with the exception of one reflectin gene, appear on the  
454 same scaffold, which corresponds very well with the distribution pattern of octopus reflectin genes  
455 [11]).

## 456 Conclusions

457 Not only because of its astonishing proportions, but also for the lack of knowledge of the key facets of  
458 its deep-sea lifestyle, the giant squid has long captured the imagination of scientists and the general  
459 public alike. With the release of this annotated giant squid genome, we set the stage for future research  
460 into the enigmas that enshroud this truly awe-inspiring creature. Further, given the paucity of available  
461 cephalopod genomes, we provide a valuable contribution to the genomic description of cephalopods,  
462 and more widely to the growing number of fields that are recognizing the potential, which this group of  
463 behaviourally advanced invertebrates holds for improving our understanding of the diversity of life on  
464 Earth in general.

## 465 Availability of supporting data

466 The data sets supporting the results of this article are available in the NCBI database via Bioproject  
467 PRJNA534469. The three transcriptome data sets (TSA) have ids GHKK01000000, GHKL01000000 and  
468 GHKH01000000 and the sequence data used for the genome assemblies has id  
469 VCCN01000000. Proteomics data are available via ProteomeXchange with identifier PXD016522.  
470 Supporting data is also available via the *Gigascience* repository GigaDB [69].

471 [Additional files](#)

472 Supplement.txt. Supplementary methods, tables and figures.

473 [Declarations](#)

474 [Abbreviations](#)

475 Gb: gigabase pairs; Mb: megabase pairs; BUSCO: Benchmarking Universal Single-copy Orthologs; bp:  
476 base pair; NCBI: National Center for Biotechnology Information; LC-MS/MS: liquid chromatography (LC)  
477 tandem mass spectrometry (MS); CCB: Colloidal Coomassie Brilliant Blue; HCD: higher-energy collisional  
478 dissociation; NCE: normalized collisional energy; AGC: Automatic Gain Control; ALC: Average Local  
479 Confidence; SP: SwissProt; Uf: UniRef90; CDD: conserved domain database; CM: covariance model; TE:  
480 transposable element; LINE: Long interspersed nuclear element; SINE: Short interspersed nuclear  
481 element; LRT: long terminal repeat.

482 [Ethics statement](#)

483 Sampling followed the recommendations from Moltschanivskyj et al., 2007 [23].

484 [Consent for publication](#)

485 Not applicable.

486 [Competing interests](#)

487 The authors declare that they have no competing interests.

488 [Funding](#)

489 R.R.F. thanks the Villum Fonden for grant VKR023446 (Villum Fonden Young Investigator Grant), the  
490 Portuguese Science Foundation (FCT) for grant PTDC/MAR/115347/2009;COMPETE-FCOMP-01-012;  
491 FEDER-015453, Marie Curie Actions (FP7-PEOPLE-2010-IEF, Proposal 272927), and the Danish National  
492 Research Foundation (DNRF96) for its funding of the Center for Macroecology, Evolution, and Climate.

493 H.O. thanks the Rede Nacional de Espectrometria de Massa, ROTEIRO/0028/2013, ref. LISBOA-01-0145-  
494 FEDER-022125, supported by COMPETE and North Portugal Regional Operational Programme  
495 (Norte2020), under the PORTUGAL 2020 Partnership Agreement, through the European Regional  
496 Development Fund (ERDF). A.C. thanks FCT for project UID/Multi/04423/2019. M.P. acknowledges the  
497 support from the Wellcome Trust (grant number WT108749/Z/15/Z) and the European Molecular  
498 Biology Laboratory. M.P.T.G. thanks the Danish National Research Foundation for its funding of the  
499 Center for GeoGenetics (grant DNRF94) and Lundbeck Foundation for grant R52-5062 on Pathogen  
500 Palaeogenomics. S.R. was supported by the Novo Nordisk Foundation grant NNF14CC0001. A.H. is  
501 supported by a Biotechnology and Biological Sciences Research Council David Phillips Fellowship  
502 [fellowship reference: BB/N020146/1]. T.B. is supported by the Biotechnology and Biological Sciences  
503 Research Council-funded South West Biosciences Doctoral Training Partnership [training grant reference  
504 BB/M009122/1]. This work was partially funded by the Lundbeck Foundation (R52-A4895 to BB).  
505 HJTH was supported by the David and Lucile Packard Foundation, the Netherlands Organization for  
506 Scientific Research (#825.09.016) and currently by the Deutsche Forschungsgemeinschaft (DFG) under  
507 grant HO 5569/2-1 (Emmy Noether Junior Research Group). T.V. and B.Br. were supported by grants  
508 from the Slovak grant agency VEGA (1/0684/16, 1/0458/18). F.S. was supported by a PhD grant  
509 (SFRH/BD/126560/2016) from FCT. A.A. was partly supported by the FCT project PTDC/CTA-  
510 AMB/31774/2017. C.C. and Y.W. are partly supported by grant IIS-1526415 from US National Science  
511 Foundation. Computation for the work described in this paper was partially supported by the DeIC  
512 National Life Science Supercomputer at DTU.

#### 513 [Authors contributions](#)

514 R.D.F. and M.T.P.G. designed the study. J.S., H-J.H. AND R.T. carried out the sampling. Alex.C., A.R., B.F.,  
515 G.C.A.Jr, H.O. and I.W. performed the laboratory work. R.D.F., Alv.C., A.M., C.B.A., F.S., P.G., T.B., A.H.,  
516 I.B.H., C.C., B.P., F.P., M.P., F.M., O.S., S.R., M.Z.R. and D.P. analyzed the data. E.J., G.Z., J.V., O.F. and Q.L.

517 contributed with genomic resources. R.D.F., L.F.C.C., A.A., Y.W., B.M., R.S., T.V., B.B., T.S-P., M.T.P.G.  
518 contributed with supervision and computational resources. R.R.F., T.S-P., R.N., M.T.P.G paid for  
519 sequencing. R.D.F. wrote the manuscript with contributions from all authors. All authors have read and  
520 approved the manuscript.

521

## 522 Acknowledgments

523 We would like to thank Anders Hansen, Tobias Mourier, Kristin Rós Kjartansdóttir and Lars Hestbjerg  
524 Hansen for help with generating sequencing data; Shawn Hoon for sharing transcriptome data; Annie  
525 Lingren for help with sample shipping; Peter Smith for providing samples and the support of the entire  
526 team at Dovetail.

## 527 References

- 528 1. Zullo L, Hochner B. A new perspective on the organization of an invertebrate brain. *Commun. Integr.*  
529 *Biol.* [Internet]. Taylor & Francis; 2011 [cited 2019 Feb 19];4:26–9. Available from:  
530 <http://www.ncbi.nlm.nih.gov/pubmed/21509172>
- 531 2. Nixon M, Young JZ. *The brains and lives of cephalopods*. Oxford: Oxford University Press, Oxford;  
532 2003.
- 533 3. Doubleday ZA, Prowse TAA, Arkhipkin A, Pierce GJ, Semmens J, Steer M, et al. Global proliferation of  
534 cephalopods. *Curr. Biol.* [Internet]. 2016 [cited 2019 May 2];26:R406–7. Available from:  
535 <http://www.ncbi.nlm.nih.gov/pubmed/27218844>
- 536 4. Vecchione M, Allcock L, Piatkowski U, Jorgensen E, Barratt I. Persistent Elevated Abundance of  
537 Octopods in an Overfished Antarctic Area. *Smithson. Poles Contrib. to Int. Polar Year Sci.* [Internet].  
538 Smithsonian Institution Scholarly Press; 2009 [cited 2019 May 2]. p. 197–204. Available from:

539 <https://repository.si.edu/handle/10088/6827>

540 5. Young RE, Vecchione M, Mangold KM. Cephalopoda, Cuvier 1797 [Internet]. Tree Life. 2018. Available  
541 from: <http://tolweb.org/Cephalopoda/19386>

542 6. Roper CF, Sweeney MJ, Nauen CE. FAO Species Catalogue Vol. 3. Cephalopods of the world. An  
543 annotated and illustrated catalogue of species of interest to fisheries. FAO Fish. Synopsis [Internet].  
544 Rome; 1984;125:277. Available from: <http://www.fao.org/3/ac479e/ac479e00.htm>

545 7. Jereb P, Roper CFE. Cephalopods of the world. An annotated and illustrated catalogue of cephalopod  
546 species known to date. Myopsid and Oegopsid Squids. FAO Species Cat. Fish. Purp. [Internet]. Food and  
547 Agriculture Organization of the United Nations; 2010 [cited 2019 Feb 19];2:605. Available from:  
548 <http://www.fao.org/3/i1920e/i1920e00.htm>

549 8. McClain CR, Balk MA, Benfield MC, Branch TA, Chen C, Cosgrove J, et al. Sizing ocean giants: patterns  
550 of intraspecific size variation in marine megafauna. PeerJ [Internet]. PeerJ Inc.; 2015 [cited 2019 May  
551 15];3:e715. Available from: <https://peerj.com/articles/715>

552 9. Paxton CGM. Unleashing the Kraken: on the maximum length in giant squid (*Architeuthis* sp.). J. Zool.  
553 [Internet]. 2016 [cited 2019 May 15];300:82–8. Available from:  
554 <https://zslpublications.onlinelibrary.wiley.com/doi/pdf/10.1111/jzo.12347>

555 10. Rosa R, Seibel BA. Slow pace of life of the Antarctic colossal squid. J. Mar. Biol. Assoc. United  
556 Kingdom [Internet]. Cambridge University Press; 2010 [cited 2019 May 2];90:1375–8. Available from:  
557 [https://www.cambridge.org/core/product/identifier/S0025315409991494/type/journal\\_article](https://www.cambridge.org/core/product/identifier/S0025315409991494/type/journal_article)

558 11. Albertin CB, Simakov O, Mitros T, Wang ZY, Pungor JR, Edsinger-Gonzales E, et al. The octopus  
559 genome and the evolution of cephalopod neural and morphological novelties. Nature [Internet]. Nature  
560 Publishing Group; 2015 [cited 2018 May 2];524:220–4. Available from:

561 <http://www.nature.com/articles/nature14668>

562 12. Liscovitch-Brauer N, Alon S, Porath HT, Elstein B, Unger R, Ziv T, et al. Trade-off between  
563 Transcriptome Plasticity and Genome Evolution in Cephalopods. *Cell* [Internet]. 2017 [cited 2019 May  
564 2];169:191–202.e11. Available from: <http://www.ncbi.nlm.nih.gov/pubmed/28388405>

565 13. Gilly WF, Beman JM, Litvin SY, Robison BH. Oceanographic and Biological Effects of Shoaling of the  
566 Oxygen Minimum Zone. *Ann. Rev. Mar. Sci.* [Internet]. 2013 [cited 2019 Feb 19];5:393–420. Available  
567 from: <http://www.ncbi.nlm.nih.gov/pubmed/22809177>

568 14. Golikov AV, Sabirov RM, Lubin PA, Jørgensen LL. Changes in distribution and range structure of Arctic  
569 cephalopods due to climatic changes of the last decades. *Biodiversity* [Internet]. Taylor & Francis Group  
570 ; 2013 [cited 2019 Feb 19];14:28–35. Available from:  
571 <http://www.tandfonline.com/doi/abs/10.1080/14888386.2012.702301>

572 15. Balmaseda MA, Trenberth KE, Källén E. Distinctive climate signals in reanalysis of global ocean heat  
573 content. *Geophys. Res. Lett.* [Internet]. John Wiley & Sons, Ltd; 2013 [cited 2019 Feb 19];40:1754–9.  
574 Available from: <http://doi.wiley.com/10.1002/grl.50382>

575 16. Bustamante P, González AF, Rocha F, Miramand P, Guerra A. Metal and metalloid concentrations in  
576 the giant squid *Architeuthis dux* from Iberian waters. *Mar. Environ. Res.* [Internet]. 2008 [cited 2019 Feb  
577 19];66:278–87. Available from: <http://www.ncbi.nlm.nih.gov/pubmed/18514304>

578 17. Unger MA, Harvey E, Vadas GG, Vecchione M. Persistent pollutants in nine species of deep-sea  
579 cephalopods. *Mar. Pollut. Bull.* [Internet]. 2008 [cited 2019 Feb 19];56:1498–500. Available from:  
580 <https://linkinghub.elsevier.com/retrieve/pii/S0025326X0800218X>

581 18. Winkelmann I, Campos PF, Strugnell J, Cherel Y, Smith PJ, Kubodera T, et al. Mitochondrial genome  
582 diversity and population structure of the giant squid *Architeuthis*: genetics sheds new light on one of the

583 most enigmatic marine species. *Proceedings. Biol. Sci.* [Internet]. 2013 [cited 2019 Apr 4];280:20130273.  
584 Available from: <http://rspb.royalsocietypublishing.org/cgi/doi/10.1098/rspb.2013.0273>

585 19. Chikhi R, Medvedev P. Informed and automated k-mer size selection for genome assembly.  
586 *Bioinformatics* [Internet]. Oxford University Press; 2014 [cited 2016 Aug 11];30:31–7. Available from:  
587 <http://www.ncbi.nlm.nih.gov/pubmed/23732276>

588 20. Chapman J a, Ho I, Sunkara S, Luo S, Schroth GP, Rokhsar DS. Meraculous: de novo genome assembly  
589 with short paired-end reads. *PLoS One* [Internet]. 2011 [cited 2013 Feb 28];6:e23501. Available from:  
590 [http://www.pubmedcentral.nih.gov/articlerender.fcgi?artid=3158087&tool=pmcentrez&rendertype=ab](http://www.pubmedcentral.nih.gov/articlerender.fcgi?artid=3158087&tool=pmcentrez&rendertype=abstract)  
591 [stract](http://www.pubmedcentral.nih.gov/articlerender.fcgi?artid=3158087&tool=pmcentrez&rendertype=abstract)

592 21. English AC, Richards S, Han Y, Wang M, Vee V, Qu J, et al. Mind the Gap: Upgrading Genomes with  
593 Pacific Biosciences RS Long-Read Sequencing Technology. Liu Z, editor. *PLoS One* [Internet]. 2012 [cited  
594 2019 Apr 4];7:e47768. Available from: <http://www.ncbi.nlm.nih.gov/pubmed/23185243>

595 22. Simão FA, Waterhouse RM, Ioannidis P, Kriventseva E V., Zdobnov EM. BUSCO: assessing genome  
596 assembly and annotation completeness with single-copy orthologs. *Bioinformatics* [Internet]. 2015  
597 [cited 2019 Apr 8];31:3210–2. Available from: [https://academic.oup.com/bioinformatics/article-](https://academic.oup.com/bioinformatics/article-lookup/doi/10.1093/bioinformatics/btv351)  
598 [lookup/doi/10.1093/bioinformatics/btv351](https://academic.oup.com/bioinformatics/article-lookup/doi/10.1093/bioinformatics/btv351)

599 23. Moltschanivskyj NA, Hall K, Lipinski MR, Marian JEAR, Nishiguchi M, Sakai M, et al. Ethical and  
600 welfare considerations when using cephalopods as experimental animals. *Rev. Fish Biol. Fish.* [Internet].  
601 Kluwer Academic Publishers; 2007 [cited 2019 Jun 22];17:455–76. Available from:  
602 <http://link.springer.com/10.1007/s11160-007-9056-8>

603 24. Patel RK, Jain M. NGS QC Toolkit: A Toolkit for Quality Control of Next Generation Sequencing Data.  
604 Liu Z, editor. *PLoS One* [Internet]. Public Library of Science; 2012 [cited 2018 Jul 31];7:e30619. Available



605 from: <http://dx.plos.org/10.1371/journal.pone.0030619>

606 25. Martin M. Cutadapt removes adapter sequences from high-throughput sequencing reads.  
607 EMBnet.journal [Internet]. 2011;17:10–2. Available from:  
608 <http://journal.embnet.org/index.php/embnetjournal/article/view/200>

609 26. Haas BJ, Papanicolaou A, Yassour M, Grabherr M, Blood PD, Bowden J, et al. De novo transcript  
610 sequence reconstruction from RNA-seq using the Trinity platform for reference generation and analysis.  
611 Nat. Protoc. [Internet]. NIH Public Access; 2013 [cited 2018 Jun 24];8:1494–512. Available from:  
612 <http://www.ncbi.nlm.nih.gov/pubmed/23845962>

613 27. Gilbert D. Gene-omes built from mRNA seq not genome DNA [Internet]. Notre Dame: 7th annual  
614 arthropod genomics symposium; 2013. Available from: <http://globalhealth.nd.edu/7th-annual-arthropod-genomics-symposium/>

615

616 28. Kleffmann T, Russenberger D, von Zychlinski A, Christopher W, Sjölander K, Gruissem W, et al. The  
617 Arabidopsis thaliana chloroplast proteome reveals pathway abundance and novel protein functions.  
618 Curr. Biol. [Internet]. 2004 [cited 2014 Aug 23];14:354–62. Available from:  
619 <http://www.ncbi.nlm.nih.gov/pubmed/15028209>

620 29. Bradford MM. A rapid and sensitive method for the quantitation of microgram quantities of protein  
621 utilizing the principle of protein-dye binding. Anal. Biochem. [Internet]. 1976 [cited 2019 Mar  
622 28];72:248–54. Available from: <http://www.ncbi.nlm.nih.gov/pubmed/942051>

623 30. Santos R, da Costa G, Franco C, Gomes-Alves P, Flammang P, Coelho A V. First Insights into the  
624 Biochemistry of Tube Foot Adhesive from the Sea Urchin *Paracentrotus lividus* (Echinoidea,  
625 Echinodermata). Mar. Biotechnol. [Internet]. 2009 [cited 2019 Mar 28];11:686–98. Available from:  
626 <http://www.ncbi.nlm.nih.gov/pubmed/19221839>

627 31. Neuhoff V, Arold N, Taube D, Ehrhardt W. Improved staining of proteins in polyacrylamide gels  
628 including isoelectric focusing gels with clear background at nanogram sensitivity using Coomassie  
629 Brilliant Blue G-250 and R-250. *Electrophoresis* [Internet]. John Wiley & Sons, Ltd; 1988 [cited 2019 Mar  
630 28];9:255–62. Available from: <http://doi.wiley.com/10.1002/elps.1150090603>

631 32. Brejová B, Vinar T, Chen Y, Wang S, Zhao G, Brown DG, et al. Finding genes in *Schistosoma*  
632 japonicum: annotating novel genomes with help of extrinsic evidence. *Nucleic Acids Res.* [Internet].  
633 2009 [cited 2016 Mar 10];37:e52. Available from:  
634 [http://www.pubmedcentral.nih.gov/articlerender.fcgi?artid=2673418&tool=pmcentrez&rendertype=ab](http://www.pubmedcentral.nih.gov/articlerender.fcgi?artid=2673418&tool=pmcentrez&rendertype=abstract)  
635 [stract](http://www.pubmedcentral.nih.gov/articlerender.fcgi?artid=2673418&tool=pmcentrez&rendertype=abstract)

636 33. Korf I. Gene finding in novel genomes. *BMC Bioinformatics* [Internet]. BioMed Central; 2004 [cited  
637 2016 Feb 17];5:59. Available from: [http://bmcbioinformatics.biomedcentral.com/articles/10.1186/1471-](http://bmcbioinformatics.biomedcentral.com/articles/10.1186/1471-2105-5-59)  
638 [2105-5-59](http://bmcbioinformatics.biomedcentral.com/articles/10.1186/1471-2105-5-59)

639 34. Lomsadze A, Ter-Hovhannisyan V, Chernoff YO, Borodovsky M. Gene identification in novel  
640 eukaryotic genomes by self-training algorithm. *Nucleic Acids Res.* [Internet]. 2005 [cited 2019 Nov  
641 13];33:6494–506. Available from: <http://www.ncbi.nlm.nih.gov/pubmed/16314312>

642 35. Musacchia F, Basu S, Petrosino G, Salvemini M, Sanges R. Annocript: a flexible pipeline for the  
643 annotation of transcriptomes able to identify putative long noncoding RNAs. *Bioinformatics* [Internet].  
644 2015 [cited 2016 Mar 14];31:2199–201. Available from:  
645 <http://bioinformatics.oxfordjournals.org/content/early/2015/02/19/bioinformatics.btv106>

646 36. Camacho C, Coulouris G, Avagyan V, Ma N, Papadopoulos J, Bealer K, et al. BLAST+: architecture and  
647 applications. *BMC Bioinformatics* [Internet]. 2009 [cited 2014 Jul 9];10:421. Available from:  
648 [http://www.pubmedcentral.nih.gov/articlerender.fcgi?artid=2803857&tool=pmcentrez&rendertype=ab](http://www.pubmedcentral.nih.gov/articlerender.fcgi?artid=2803857&tool=pmcentrez&rendertype=abstract)  
649 [stract](http://www.pubmedcentral.nih.gov/articlerender.fcgi?artid=2803857&tool=pmcentrez&rendertype=abstract)

650 37. Burge SW, Daub J, Eberhardt R, Tate J, Barquist L, Nawrocki EP, et al. Rfam 11.0: 10 years of RNA  
651 families. *Nucleic Acids Res.* [Internet]. Narnia; 2013 [cited 2019 Apr 4];41:D226–32. Available from:  
652 <http://academic.oup.com/nar/article/41/D1/D226/1050811/Rfam-110-10-years-of-RNA-families>

653 38. Gardner PP, Daub J, Tate J, Moore BL, Osuch IH, Griffiths-Jones S, et al. Rfam: Wikipedia, clans and  
654 the “decimal” release. *Nucleic Acids Res.* [Internet]. Narnia; 2011 [cited 2019 Apr  
655 4];39:D141–5. Available from: <https://academic.oup.com/nar/article-lookup/doi/10.1093/nar/gkq1129>

656 39. Freyhult EK, Bollback JP, Gardner PP. Exploring genomic dark matter: a critical assessment of the  
657 performance of homology search methods on noncoding RNA. *Genome Res.* [Internet]. Cold Spring  
658 Harbor Laboratory Press; 2007 [cited 2019 Apr 4];17:117–25. Available from:  
659 <http://www.ncbi.nlm.nih.gov/pubmed/17151342>

660 40. Chan PP, Lowe TM. GtRNADB: a database of transfer RNA genes detected in genomic sequence.  
661 *Nucleic Acids Res.* [Internet]. Narnia; 2009 [cited 2019 Apr 4];37:D93–7. Available from:  
662 <https://academic.oup.com/nar/article-lookup/doi/10.1093/nar/gkn787>

663 41. Lowe TM, Eddy SR. tRNAscan-SE: a program for improved detection of transfer RNA genes in  
664 genomic sequence. *Nucleic Acids Res.* [Internet]. 1997 [cited 2019 Apr 4];25:955–64. Available from:  
665 <http://www.ncbi.nlm.nih.gov/pubmed/9023104>

666 42. Smit AFA, Hubley RR, Green PR. RepeatMasker Open-4.0. 2013.

667 43. Bao W, Kojima KK, Kohany O. Repbase Update, a database of repetitive elements in eukaryotic  
668 genomes. *Mob. DNA* [Internet]. 2015 [cited 2019 Apr 17];6:11. Available from:  
669 <http://www.ncbi.nlm.nih.gov/pubmed/26045719>

670 44. Smit A, Hubley R. RepeatModeler Open-1.0. 2015.

671 45. Bao Z, Eddy SR. Automated de novo identification of repeat sequence families in sequenced

672 genomes. *Genome Res.* [Internet]. 2002 [cited 2019 Apr 17];12:1269–76. Available from:  
673 <http://www.genome.org/cgi/doi/10.1101/gr.88502>

674 46. Price AL, Jones NC, Pevzner PA. De novo identification of repeat families in large genomes.  
675 *Bioinformatics* [Internet]. 2005 [cited 2019 Apr 17];21:i351–8. Available from:  
676 <http://www.ncbi.nlm.nih.gov/pubmed/15961478>

677 47. Platt RN, Blanco-Berdugo L, Ray DA. Accurate Transposable Element Annotation Is Vital When  
678 Analyzing New Genome Assemblies. *Genome Biol. Evol.* [Internet]. 2016 [cited 2019 Apr 17];8:403–10.  
679 Available from: <https://academic.oup.com/gbe/article-lookup/doi/10.1093/gbe/evw009>

680 48. Schnable PS, Ware D, Fulton RS, Stein JC, Wei F, Pasternak S, et al. The B73 Maize Genome:  
681 Complexity, Diversity, and Dynamics. *Science* (80-. ). [Internet]. 2009 [cited 2019 Apr 17];326:1112–5.  
682 Available from: <http://www.ncbi.nlm.nih.gov/pubmed/19965430>

683 49. Wu C, Twort VG, Crowhurst RN, Newcomb RD, Buckley TR. Assembling large genomes: analysis of  
684 the stick insect (*Clitarchus hookeri*) genome reveals a high repeat content and sex-biased genes  
685 associated with reproduction. *BMC Genomics* [Internet]. 2017 [cited 2019 Apr 17];18:884. Available  
686 from: <http://www.ncbi.nlm.nih.gov/pubmed/29145825>

687 50. Initial sequencing and analysis of the human genome. *Nature* [Internet]. Nature Publishing Group;  
688 2001 [cited 2019 Apr 17];409:860–921. Available from: <http://www.nature.com/articles/35057062>

689 51. Kim B-M, Kang S, Ahn D-H, Jung S-H, Rhee H, Yoo JS, et al. The genome of common long-arm octopus  
690 *Octopus minor*. *Gigascience* [Internet]. 2018 [cited 2019 Apr 17];7. Available from:  
691 <http://www.ncbi.nlm.nih.gov/pubmed/30256935>

692 52. Belcaid M, Casaburi G, McAnulty SJ, Schmidbaur H, Suria AM, Moriano-Gutierrez S, et al. Symbiotic  
693 organs shaped by distinct modes of genome evolution in cephalopods. *Proc. Natl. Acad. Sci. U. S. A.*

694 [Internet]. National Academy of Sciences; 2019 [cited 2019 Apr 17];116:3030–5. Available from:  
695 <http://www.ncbi.nlm.nih.gov/pubmed/30635418>

696 53. Schrader L, Schmitz J. The impact of transposable elements in adaptive evolution. *Mol. Ecol.*  
697 [Internet]. 2018 [cited 2019 Apr 17];28:1537–49. Available from:  
698 <http://www.ncbi.nlm.nih.gov/pubmed/30003608>

699 54. Zarrella I, Herten K, Maes GE, Tai S, Yang M, Seuntjens E, et al. The survey and reference assisted  
700 assembly of the *Octopus vulgaris* genome. *Sci. Data* [Internet]. Nature Publishing Group; 2019 [cited  
701 2019 Jun 9];6:13. Available from: <http://www.nature.com/articles/s41597-019-0017-6>

702 55. Nawrocki EP, Burge SW, Bateman A, Daub J, Eberhardt RY, Eddy SR, et al. Rfam 12.0: updates to the  
703 RNA families database. *Nucleic Acids Res.* [Internet]. 2015 [cited 2019 Apr 4];43:D130–7. Available from:  
704 <http://www.ncbi.nlm.nih.gov/pubmed/25392425>

705 56. Cadigan KM, Nusse R. Wnt signaling: a common theme in animal development. *Genes Dev.*  
706 [Internet]. Cold Spring Harbor Laboratory Press; 1997 [cited 2019 May 8];11:3286–305. Available from:  
707 <http://www.ncbi.nlm.nih.gov/pubmed/9407023>

708 57. Cho S-J, Valles Y, Giani VC, Seaver EC, Weisblat DA. Evolutionary Dynamics of the wnt Gene Family: A  
709 Lophotrochozoan Perspective. *Mol. Biol. Evol.* [Internet]. 2010 [cited 2019 May 16];27:1645–58.  
710 Available from: <http://www.ncbi.nlm.nih.gov/pubmed/20176615>

711 58. Simakov O, Marletaz F, Cho S-J, Edsinger-Gonzales E, Havlak P, Hellsten U, et al. Insights into  
712 bilaterian evolution from three spiralian genomes. *Nature* [Internet]. 2012 [cited 2019 May  
713 16];493:526–31. Available from: <http://www.ncbi.nlm.nih.gov/pubmed/23254933>

714 59. Chen W V, Maniatis T. Clustered protocadherins. *Development* [Internet]. Company of Biologists;  
715 2013 [cited 2018 Oct 21];140:3297–302. Available from:

716 <http://www.ncbi.nlm.nih.gov/pubmed/23900538>

717 60. Zipursky SL, Sanes JR. Chemoaffinity revisited: dscams, protocadherins, and neural circuit assembly.  
718 Cell [Internet]. 2010 [cited 2019 May 16];143:343–53. Available from:  
719 <https://linkinghub.elsevier.com/retrieve/pii/S0092867410011451>

720 61. Pratihari S, Prasad Nath R, Kumar Kundu J. Hox genes and its role in animal development. Int. J. Sci.  
721 Nat. [Internet]. 2010 [cited 2019 Apr 4];1:101–3. Available from:  
722 [http://www.scienceandnature.org/IJSN\\_V1\(2\)\\_D2010/IJSN\\_V1\(2\)\\_2.pdf](http://www.scienceandnature.org/IJSN_V1(2)_D2010/IJSN_V1(2)_2.pdf)

723 62. Fröblius AC, Matus DQ, Seaver EC. Genomic Organization and Expression Demonstrate Spatial and  
724 Temporal Hox Gene Colinearity in the Lophotrochozoan *Capitella* sp. I. Butler G, editor. PLoS One  
725 [Internet]. 2008 [cited 2019 Apr 4];3:e4004. Available from:  
726 <http://www.ncbi.nlm.nih.gov/pubmed/19104667>

727 63. Mallo M, Wellik DM, Deschamps J. Hox genes and regional patterning of the vertebrate body plan.  
728 Dev. Biol. [Internet]. 2010 [cited 2019 Apr 4];344:7–15. Available from:  
729 <http://www.ncbi.nlm.nih.gov/pubmed/20435029>

730 64. Pernice M, Deutsch JS, Andouche A, Boucher-Rodoni R, Bonnaud L. Unexpected variation of Hox  
731 genes' homeodomains in cephalopods. Mol. Phylogenet. Evol. [Internet]. Academic Press; 2006 [cited  
732 2019 Apr 4];40:872–9. Available from:  
733 <https://www.sciencedirect.com/science/article/pii/S1055790306001369?via%3Dihub>

734 65. Barucca M, Canapa A, Biscotti MA, Zappavigna V. An Overview of Hox Genes in Lophotrochozoa:  
735 Evolution and Functionality. J. Dev. Biol. [Internet]. Multidisciplinary Digital Publishing Institute (MDPI);  
736 2016 [cited 2019 Apr 4];4:1–15. Available from: <http://www.ncbi.nlm.nih.gov/pubmed/29615580>

737 66. Crookes WJ, Ding L-L, Huang QL, Kimbell JR, Horwitz J, McFall-Ngai MJ. Reflectins: The Unusual

738 Proteins of Squid Reflective Tissues. *Science* (80-. ). [Internet]. 2004 [cited 2019 Feb 19];303:235–8.  
739 Available from: <http://www.ncbi.nlm.nih.gov/pubmed/14716016>

740 67. Wardill TJ, Gonzalez-Bellido PT, Crook RJ, Hanlon RT. Neural control of tuneable skin iridescence in  
741 squid. *Proc. R. Soc. B Biol. Sci.* [Internet]. The Royal Society; 2012 [cited 2019 May 16];279:4243–52.  
742 Available from: <http://rspb.royalsocietypublishing.org/cgi/doi/10.1098/rspb.2012.1374>

743 68. Pace RM, Grbić M, Nagy LM. Composition and genomic organization of arthropod Hox clusters.  
744 *Evodevo* [Internet]. BioMed Central; 2016 [cited 2019 Oct 27];7:11. Available from:  
745 <http://evodevojournal.biomedcentral.com/articles/10.1186/s13227-016-0048-4>

746 69. Fonseca RR, Couto A, Machado AM, Brejova B, Albertin CB, Silva F, et al. Supporting data for "A draft  
747 genome sequence of the elusive giant squid, *Architeuthis dux*" GigaScience Database 2019.  
748 <http://dx.doi.org/10.5524/100676>

749

750

752 **Table 1.** Statistics of the giant squid genome assembly (Meraculous + Dovetail) and corresponding gene  
 753 prediction and functional annotation. The transcript evidence was confirmed by blastp hits with e-value  
 754  $< 10E^{-6}$  using the transcriptomes of three other species of squid (see the “Transcriptome sequencing”  
 755 section).

756

| <b>Global Statistics</b>                                    |               |                                  |
|-------------------------------------------------------------|---------------|----------------------------------|
| <b>Genome assembly*</b>                                     | <b>Genome</b> | <b>Gene models with evidence</b> |
| Input assembly                                              | Meraculous    |                                  |
| Contig N50 length (Mb)                                      | 0.005         |                                  |
| Longest contig (Mb)                                         | 0.120         |                                  |
| Scaffold N50 length (Mb)                                    | 4.852         |                                  |
| Longest scaffold (Mb)                                       | 32.889        |                                  |
| Total length (Gb)                                           | 2.693         |                                  |
| <b>BUSCO statistics (<sup>1</sup>Euk / <sup>2</sup>Met)</b> |               |                                  |
| Complete BUSCOs, (%)                                        | 86.1 / 88.5   | 81.6 / 78.3                      |
| Complete and single-copy, (%)                               | 85.1 / 87.6   | 79.9 / 77.7                      |
| Complete and duplicated, (%)                                | 1.0 / 0.9     | 1.7 / 0.6                        |
| Partial, (%)                                                | 4.3 / 3.6     | 9.6 / 5.7                        |
| Missing, (%)                                                | 9.6 / 7.9     | 8.8 / 16.0                       |
| Total Buscos found, (%)                                     | 90.4 / 92.1   | 91.2 / 84.0                      |
| <b>Genome annotation / Gene Prediction</b>                  |               |                                  |
| Protein-coding gene number                                  | 33,406        |                                  |
| Transcript evidence                                         | 30,472        |                                  |
| Average Protein length, (aa)                                | 339           |                                  |
| Longest Protein, (aa)                                       | 17,047        |                                  |
| Average CDS length, (bp)                                    | 1,015         |                                  |
| Longest CDS, (bp)                                           | 51,138        |                                  |



|                           |     |
|---------------------------|-----|
| Average exon length, (bp) | 199 |
| Average exons per gene    | 5   |

---

**Functional annotation (Number of Hits)**

---

|                                  |        |
|----------------------------------|--------|
| Swissprot                        | 15,749 |
| Uniref90                         | 29,553 |
| GO Terms                         | 4,712  |
| Conserved Domains Database (CDD) | 15,280 |

---

\*The presented statistics are to contigs/scaffolds with length  $\geq$  500 bp.

<sup>1</sup>Euk: Database of Eukaryota orthologs genes, containing a total of 303 BUSCO groups.

<sup>2</sup>Met: Database of Metazoa orthologs genes, containing a total of 978 BUSCO groups.

757

758

759

760

761 [Figure legends](#)

762 **Figure 1.** Comparison of genome repeat content among available cephalopod genomes with assembled  
763 genomes (repeat data for *O. minor* and *O. bimaculoides* from [51] and for *E. scolopes* from [52]). The  
764 tree indicates evolutionary relationships among the two available octopod cephalopods and the two  
765 available decapod cephalopods. Pie charts are scaled according to genome size (*O. bimaculoides*: 2.7Gb,  
766 *O. minor*: 5.09Gb, *E. scolopes*: 5.1Gb, *A. dux*: 2.7Gb), with different repeat types indicated by the colours  
767 presented in the key.

768 **Figure 2. A)** Stacked bar chart illustrating the proportions (expressed as percentage of the total genome)  
769 of repeats found in genic ( $\leq 2$ kb from an annotated gene) and intergenic regions ( $> 2$ kb from an  
770 annotated gene) for the giant squid genome. **B)** Transposable element (TE) accumulation history in the  
771 giant squid genome, based on a Kimura distance-based copy divergence analysis of TEs, with Kimura  
772 substitution level (CpG adjusted) illustrated on the x-axis, and percentage of the genome represented by  
773 each repeat type on the y-axis. Repeat type is indicated by the colour chart below the x-axis.

774 **Figure 3.** Schematic representation of the Hox gene clusters. Different scaffolds are separated by two  
775 slashes. **A)** Simplified classification of the Hox clusters genomic organisation. Type A identifies the lack of  
776 a “typical” Hox cluster configuration, i.e. genes are scattered through the genome (not closely placed);  
777 Type S indicates a Hox cluster that is separated by a chromosomal breakpoint; Type D clusters  
778 comprehend all the genes in the same location but encompassing a larger region than in organised  
779 clusters and may display non-Hox genes and repeats in between; Type O indicates a very compact  
780 cluster embracing a short region with only Hox genes. Non-coding RNA and miRNA can be found. **B)**  
781 Simplified scheme of the chromosomal organisation in various invertebrates. Scaffold length is shown  
782 underneath. Unlike in other coleoids, for *Architeuthis dux* all Hox genes were found in the same scaffold.  
783 However, the distance between the genes was larger than expected for invertebrate organisms, and

784 non-homeobox genes were also present within the cluster. Hox2 remains undetected in coleoids. *A. dux*  
785 cluster can be found in scaffold25. *E. scolopes*, *O. bimaculoides*, *L. gigantea*, *C. teleta* and *D.*  
786 *melanogaster* assemblies and Hox cluster details can be found in [11,52,58,68]. (\*) This gene was  
787 reported in a different scaffold, adjacent to non-Hox genes (the length corresponds to the size of the  
788 gene). **C)** Complete representation of the Hox cluster found in *A. dux* including the non-Hox genes. PO –  
789 Predicted open reading frame; TATDN2 – Putative deoxyribonuclease TATDN2; ZMYM1 – Zinc finger  
790 MYM-type protein 1; POGK – Pogo transposable element with KRAB; Zinc finger – Zinc finger protein;  
791 MYB-like – Putative Myb-like DNA-binding domain protein; MAPRE1 – Microtubule-associated protein  
792 RP/EB family member 1; MGC12965 – Similar to Cytochrome c, somatic.

793

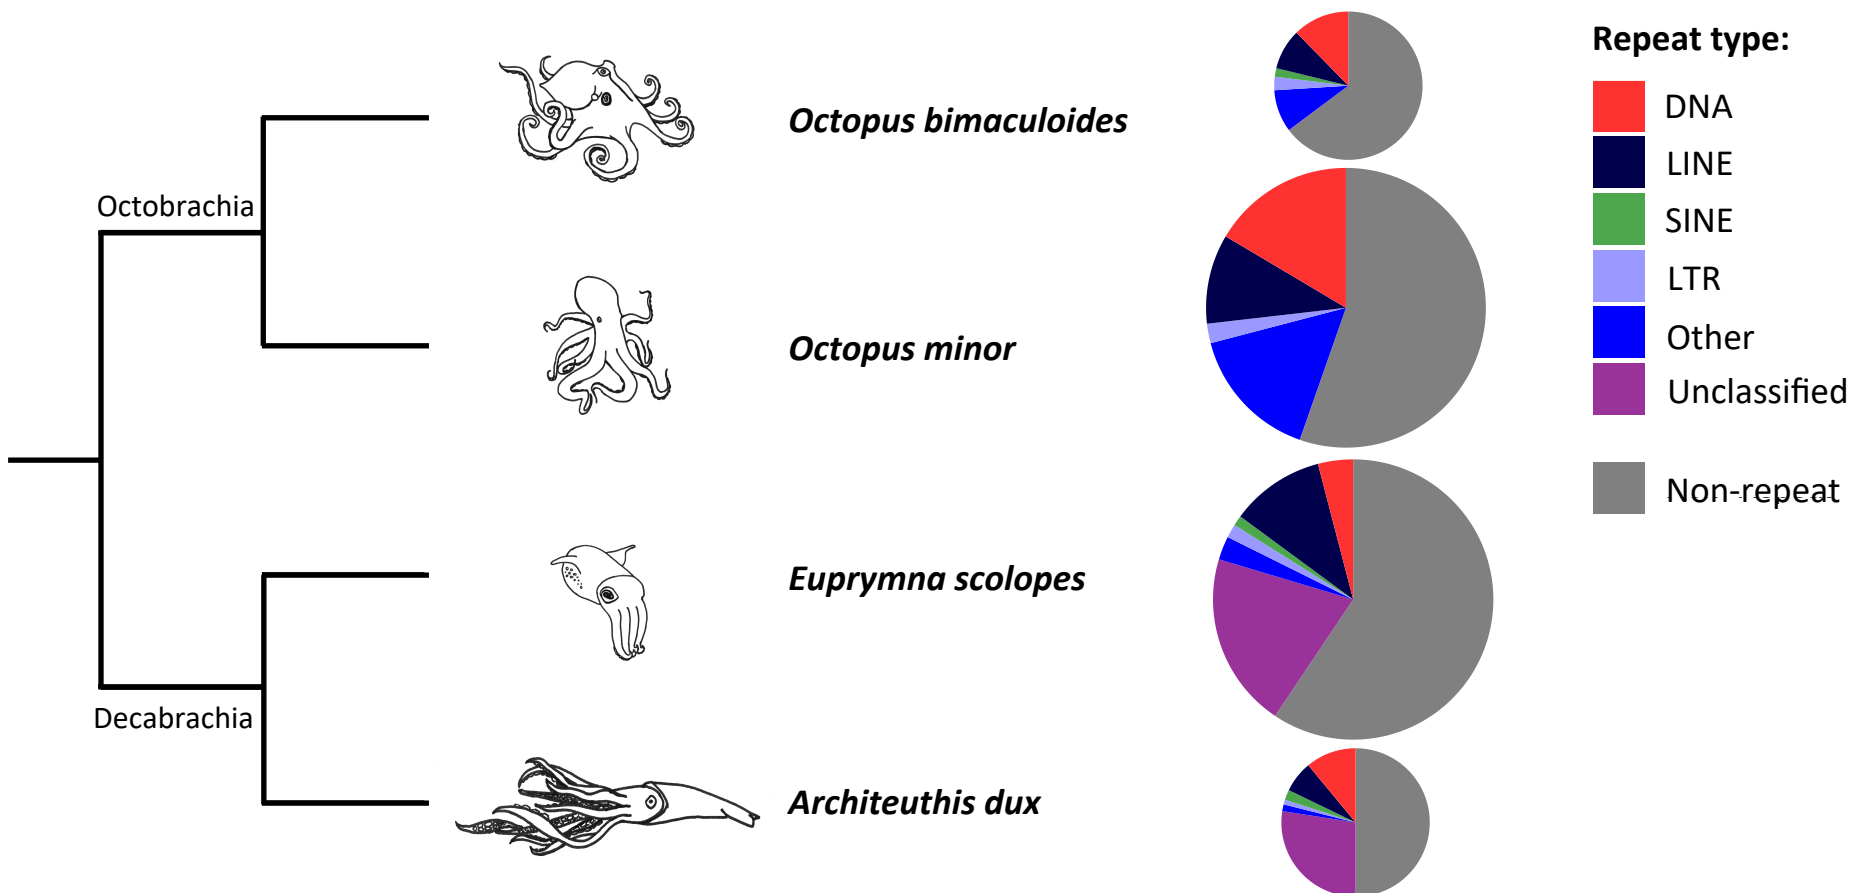

**A**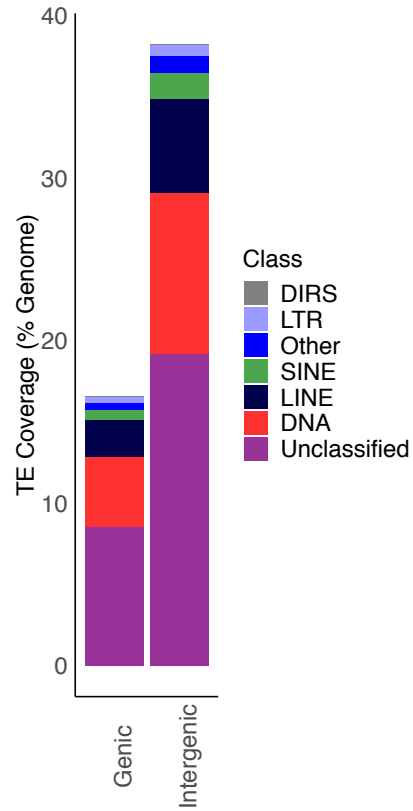**B**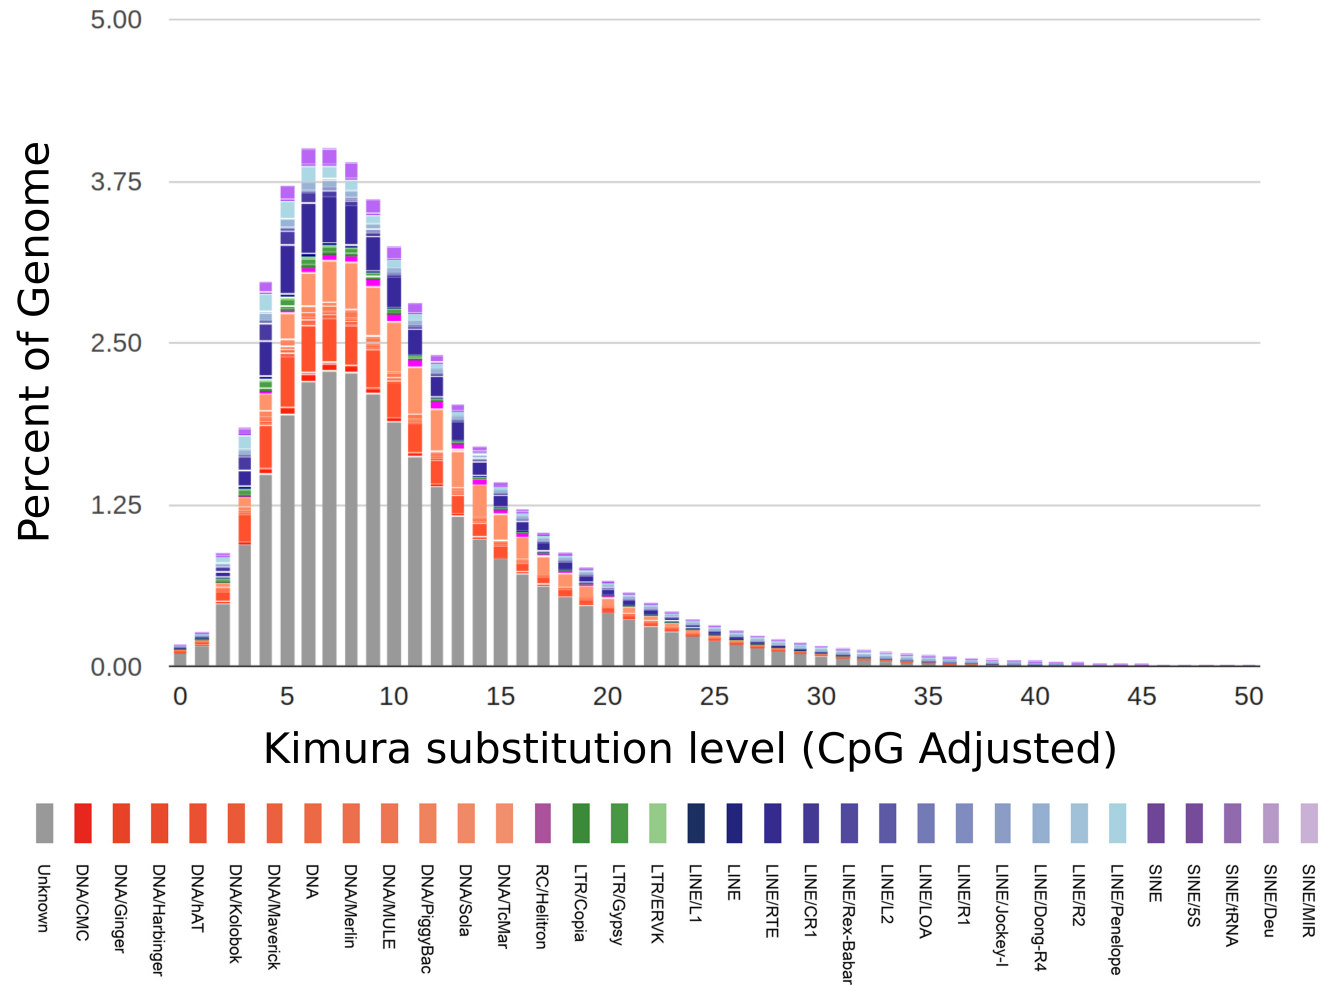

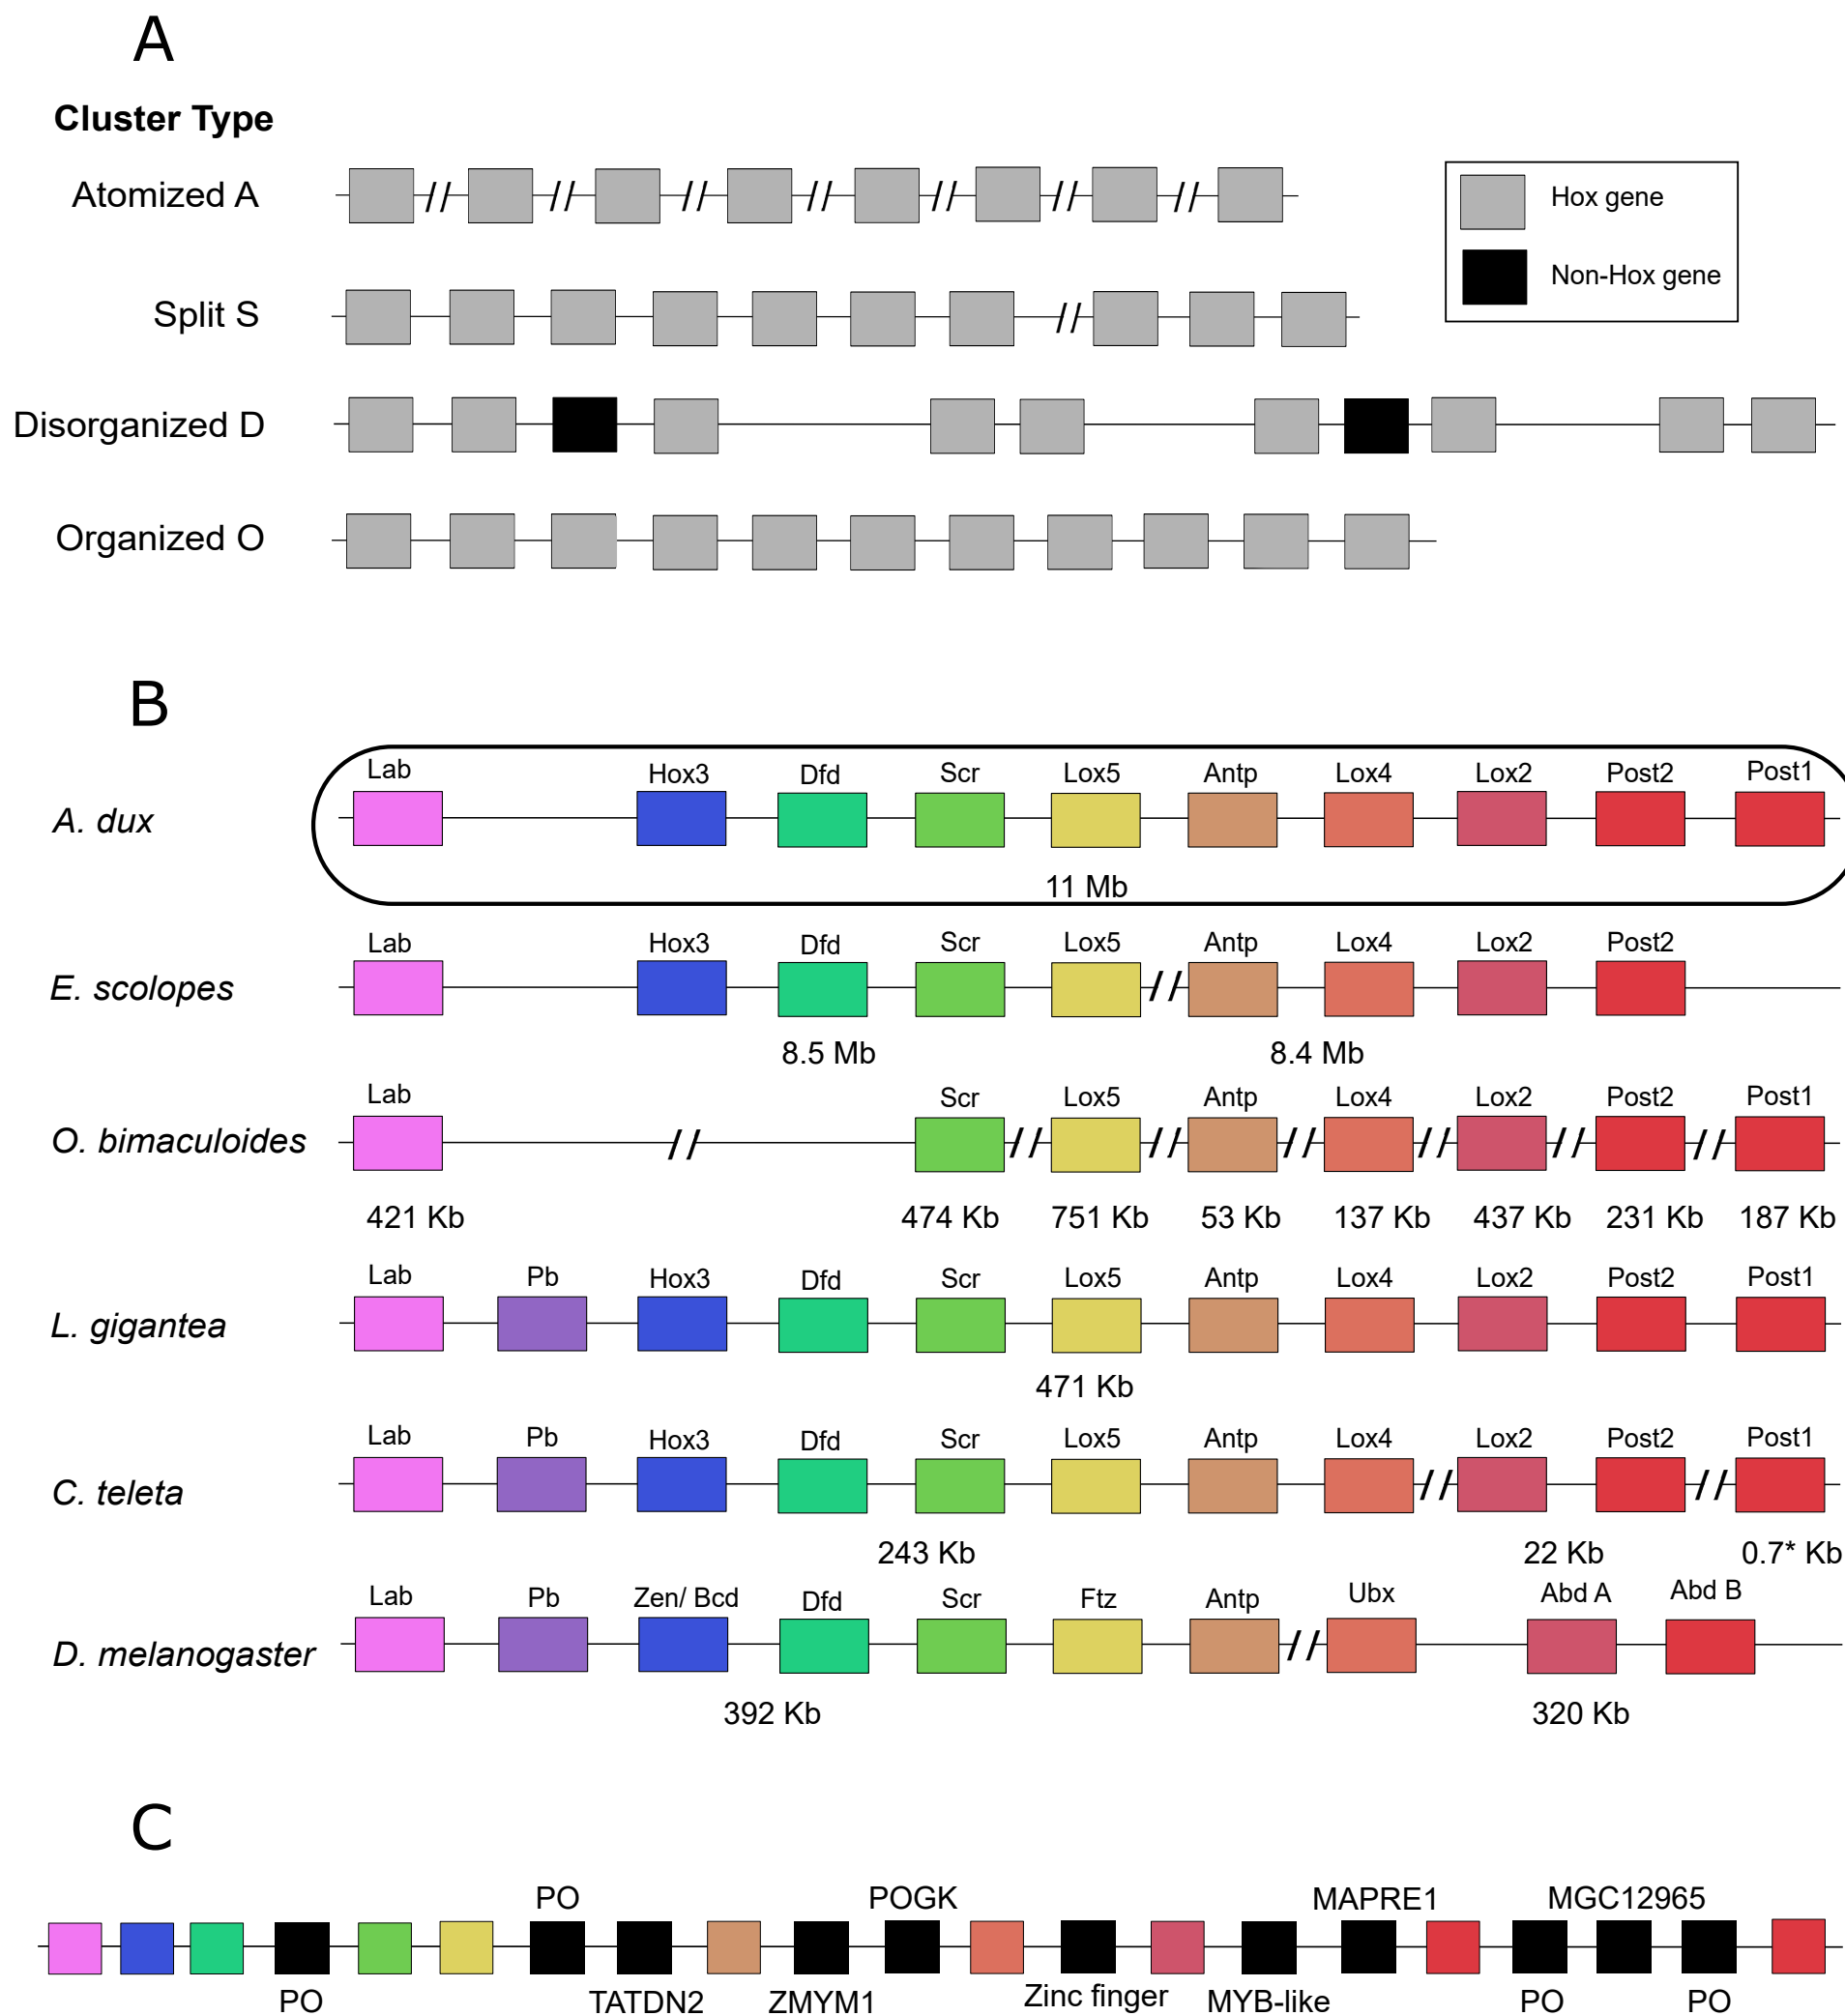

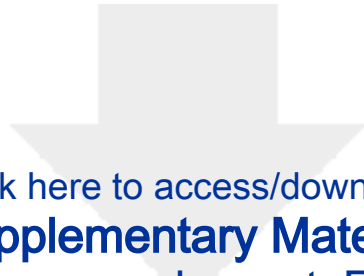

Click here to access/download  
**Supplementary Material**  
RFonseca\_supplement\_RF1.docx

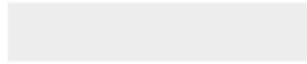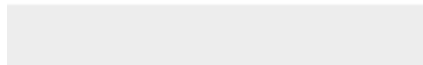

Dear Editor,

We herewith submit our revised manuscript 'A draft genome sequence of the elusive giant squid, *Architeuthis dux*'. We have edited the manuscript to clarify the issues raised by you and Reviewer #2, uploaded the files with the filtered annotations to the GigaScience server and updated the README file accordingly. Please find the answers to all comments below.

Rute Fonseca on behalf of all the authors.

Editor's comments:

Reviewer 2 is still concerned regarding the uncertainty of the gene models and says that, ideally, transcriptome data should be used to address this. The reviewer and I are aware that this may not be possible in this species. In this case, I agree with the reviewer that a good way forward would be to provide both, the original and the filtered versions, and discuss the uncertainties around the gene models in the paper.

We now make it clearer that transcriptomes of closely related squid species were used to guide the annotation process (since it is impossible to get that type of data from a giant squid). We do provide the two sets of annotations and extended our discussion regarding the gene models in the main text (added information from Lines 252 to 278).

Reviewer reports:

Reviewer #2: The authors have addressed most of my comments. However, I am still cautious about their gene model prediction. Running gene prediction using parameters from other species, especially *Drosophila* usually gives rise to very inaccurate results. The best situation would be using the transcriptome from the same species to train the gene model predictor. I understand there might be a technical limitation, but applying a random filter threshold to reduce the numbers of gene models is also problematic. This filtering may remove lineage-specific genes (i.e., novel genes in this species) and neural peptide genes that are usually very short. If having a good gene model is not possible, I would recommend the authors providing both versions of their gene models (i.e., original and filtered). And the authors should address this weakness in their manuscript.

Please note that the model parameters that were used for the final gene prediction were *A. dux* specific, they were definitely not *D. melanogaster* parameters. *D. melanogaster* parameters were used only as a starting point in the iterative process that has been guided, among other things, by RNA-seq and proteomes from closely-related oegopsid squid species (unfortunately, we cannot obtain RNA-seq from *A. dux* due to difficulties of obtaining RNA from long-dead specimens). The RNA-seq and proteome information has also been used in the final stage of gene predictions. In this setup, the gene finder can adapt to new species (even species distant from the original parameters) and can give predictions that is in high concordance with related RNA-seq / proteome information where such information is available, while still predicting novel genes in the areas not covered by such evidence.



Methodology of iterative adaptation of gene finding parameters to new species has been previously rigorously evaluated by us (see reference [32] in the paper) as well as others (see e.g. Korf 2004, Lomsadze et al. 2005) and has been confirmed to lead to fast adaptation of the parameters to new species. **We have made additional changes to the text describing gene finding to make this more apparent.**

As to the high number of gene predictions, we think that this is mostly artefact of low contiguity of the assembly (lots of sequencing gaps) that leads to shorter gene models. (This issue is already discussed in the paper.) You are, of course, correct in pointing out that filtering for “supported” genes may lead to exclusion of truly novel genes. **Based on your suggestion, we now provide both original and filtered data sets of gene models.**

We base the downstream functional analysis on the filtered gene set, which is done based on sequence similarity to transcriptomes and proteomes of related species (not based on a length cutoff). Note that we are unable to assign putative functional characterization to genes without any additional evidence, since such assignment is done based mostly on sequence similarity. Thus, genes that were filtered out are unlikely to affect downstream analysis in significant ways, yet **we agree that they may be a useful resource for other subsequent studies.**

Please note the added information within the text extending from line 252 to line 278, which includes the extra references (below for details).

Korf I. Gene finding in novel genomes. BMC bioinformatics. 2004 Dec;5(1):59.

Lomsadze A, Ter-Hovhannisyan V, Chernoff YO, Borodovsky M. Gene identification in novel eukaryotic genomes by self-training algorithm, Nucleic Acids Res. , 2005, vol. 33 (pg. 6494-6496)

Minor comments:

Lines 261-262: "*Drosophila melanogaster*" -> use italic type

Done.

Line 265: "*A. dux*" -> use italic type

Done.

Line 266: "*A. dux*" -> use italic type

Done.
